# Supplementary material for: What is the care pathway of patients who undergo thyroid surgery in France and its potential pitfalls? A national cohort
Source: PubMed Central journal article supplement — BMJ Open. 2017 Apr 5;7(4):e013589. doi: 10.1136/bmjopen-2016-013589 (PMC5558818; doi:10.1136/bmjopen-2016-013589), 2017-04-05
Supplement: bmjopen-2016-013589.draft_revisions.pdf [file bmjopen-2016-013589.draft_revisions.pdf]

# BMJ Open

## A call to improve the management of patients prior to thyroidectomy and to avoid overdiagnosis and harms to patients.

|                                 |                                                                                                                                                                                                                                                                                                                                                                                                                                                                                                                                                                                                                                                                                                                                                                                                                                                                                                                                                                                                                                                                                                                                                                                                                                                                                                                                                                    |
|---------------------------------|--------------------------------------------------------------------------------------------------------------------------------------------------------------------------------------------------------------------------------------------------------------------------------------------------------------------------------------------------------------------------------------------------------------------------------------------------------------------------------------------------------------------------------------------------------------------------------------------------------------------------------------------------------------------------------------------------------------------------------------------------------------------------------------------------------------------------------------------------------------------------------------------------------------------------------------------------------------------------------------------------------------------------------------------------------------------------------------------------------------------------------------------------------------------------------------------------------------------------------------------------------------------------------------------------------------------------------------------------------------------|
| Journal:                        | <i>BMJ Open</i>                                                                                                                                                                                                                                                                                                                                                                                                                                                                                                                                                                                                                                                                                                                                                                                                                                                                                                                                                                                                                                                                                                                                                                                                                                                                                                                                                    |
| Manuscript ID                   | bmjopen-2016-013589                                                                                                                                                                                                                                                                                                                                                                                                                                                                                                                                                                                                                                                                                                                                                                                                                                                                                                                                                                                                                                                                                                                                                                                                                                                                                                                                                |
| Article Type:                   | Research                                                                                                                                                                                                                                                                                                                                                                                                                                                                                                                                                                                                                                                                                                                                                                                                                                                                                                                                                                                                                                                                                                                                                                                                                                                                                                                                                           |
| Date Submitted by the Author:   | 26-Jul-2016                                                                                                                                                                                                                                                                                                                                                                                                                                                                                                                                                                                                                                                                                                                                                                                                                                                                                                                                                                                                                                                                                                                                                                                                                                                                                                                                                        |
| Complete List of Authors:       | <p>Mathonnet, Muriel; Hospital of Limoges<br/>Cuerq, Anne; Caisse nationale de l'assurance maladie des travailleurs salariés<br/>Tresallet, Christophe; Pitié-Salpêtrière hospital, Department of general, visceral and endocrine surgery, 47/83 Boulevard de l'Hôpital, 75013 Paris, France<br/>Thalabard, Jean-Christophe; Hospital Cochin, Unit of Gynecology and endocrinology, 53 Avenue de l'Observatoire, 75014 Paris, France<br/>Fery-Lemonnier, Elisabeth; Ministry of Health, 14 avenue Duquesne, 75007 Paris<br/>Russ, Gilles; Pitié Salpêtrière hospital, University Paris VI, Institut E3M, Department of thyroid diseases and endocrine tumors, 83 Boulevard de l'Hôpital, 75013 Paris, France<br/>Leenhardt, Laurence; Pitié Salpêtrière hospital, University Paris VI, Institut E3M, Department of thyroid diseases and endocrine tumors, 83 Boulevard de l'Hôpital, 75013 Paris, France<br/>Bigorgne, Claude; La Pitié Salpêtrière Hospital, Department of Pathology, 83 bd de l'Hôpital, 75651 Paris, France<br/>Tuppin, Philippe; Caisse nationale de l'assurance maladie des travailleurs salariés<br/>Millat, Bertrand; Caisse Nationale d'Assurance Maladie des Travailleurs Salariés<br/>Fagot-Campagna, Anne; Caisse Nationale d'Assurance Maladie des Travailleurs Salariés, Département d'études sur les pathologies et les patients</p> |
| <b>Primary Subject Heading</b>: | Diabetes and endocrinology                                                                                                                                                                                                                                                                                                                                                                                                                                                                                                                                                                                                                                                                                                                                                                                                                                                                                                                                                                                                                                                                                                                                                                                                                                                                                                                                         |
| Secondary Subject Heading:      | Public health, Surgery, Ear, nose and throat/otolaryngology, Epidemiology, Oncology                                                                                                                                                                                                                                                                                                                                                                                                                                                                                                                                                                                                                                                                                                                                                                                                                                                                                                                                                                                                                                                                                                                                                                                                                                                                                |
| Keywords:                       | SURGERY, Thyroid disease < DIABETES & ENDOCRINOLOGY, overdiagnosis, cancer                                                                                                                                                                                                                                                                                                                                                                                                                                                                                                                                                                                                                                                                                                                                                                                                                                                                                                                                                                                                                                                                                                                                                                                                                                                                                         |

1  
2  
3  
4  
5  
6  
7  
8  
9  
10  
11  
12  
13  
14  
15  
16  
17  
18  
19  
20  
21  
22  
23  
24  
25  
26  
27  
28  
29  
30  
31  
32  
33  
34  
35  
36  
37  
38  
39  
40  
41  
42  
43  
44  
45  
46  
47  
48  
49  
50  
51  
52  
53  
54  
55  
56  
57  
58  
59  
60

For peer review only

1  
2  
3 **A CALL TO IMPROVE THE MANAGEMENT OF PATIENTS PRIOR TO THYROIDECTOMY AND TO AVOID**  
4  
5 **OVERDIAGNOSIS AND HARMS TO PATIENTS.**  
6

7  
8 Muriel Mathonnet<sup>1</sup> MD PhD, Anne Cuerq<sup>2</sup> MSc, Christophe Tresallet<sup>3</sup> MD PhD, Jean-Christophe  
9  
10 Thalabard<sup>4</sup> MD PhD, Elisabeth Fery-Lemonnier<sup>5</sup> MD, Gilles Russ<sup>6</sup> MD, Laurence Leenhardt<sup>6</sup> MD PhD,  
11  
12 Claude Bigorgne<sup>7</sup> MD, Philippe Tuppin<sup>2</sup> MD PhD, Bertrand Millat<sup>8</sup> MD, Anne Fagot-Campagna<sup>2</sup> MD  
13  
14 PhD.  
15

16  
17  
18  
19 **AFFILIATIONS**  
20

21 1 Hospital of Limoges, 2 Avenue Martin Luther King, 87000 Limoges, France  
22

23 2 Caisse Nationale d'Assurance Maladie des Travailleurs Salariés, 50 avenue du Professeur André  
24 Lemierre, 75986 Paris, France  
25

26 3 Pitié-Salpêtrière hospital, Department of general, visceral and endocrine surgery, 47/83 Boulevard  
27 de l'Hôpital, 75013 Paris, France  
28

29 4 Hospital Cochin, Unit of Gynecology and endocrinology, 53 Avenue de l'Observatoire, 75014 Paris,  
30 France  
31

32 5. Ministry of Health, 14 avenue Duquesne, 75007 Paris  
33

34 6 Pitié Salpêtrière hospital, University Paris VI, Institut E3M, Department of thyroid diseases and  
35 endocrine tumors, 83 Boulevard de l'Hôpital, 75013 Paris, France  
36

37 7 La Pitié Salpêtrière Hospital, Department of Pathology, 83 bd de l'Hôpital, 75651 Paris, France  
38

39 8 Hôpital Lapeyronie, 371 Av. du Doyen Gaston Giraud, 34295 Montpellier Cedex 5 34295  
40 Montpellier cedex 5  
41

42  
43 **CORRESPONDING AUTHOR:** Anne Fagot-Campagna at [anne.fagot@cnamts.fr](mailto:anne.fagot@cnamts.fr)  
44

45  
46 Caisse Nationale d'Assurance Maladie des Travailleurs Salariés, 50 avenue du Professeur André  
47  
48 Lemierre, 75986 Paris, France, Tel 33 1 72 60 20 59  
49

50  
51 **KEY-WORDS:** thyroid; surgery; cancer; Sniiram; overdiagnosis  
52

53 5119 words (text)  
54  
55  
56  
57  
58  
59  
60

**ABSTRACT**

**Context.** The rate of thyroid cancer is increasing in France, as well as concerns about overdiagnosis and treatment.

**Objectives.** To examine the care pathway of patients who undergo thyroid surgery in France and detect potential pitfalls.

**Design.** A large observational study based on medical reimbursements, 2009-2011.

**Setting.** Data from the Sniiram (National Health Insurance Information System).

**Patients.** Patients with thyroid surgery in 2010, classified into four groups: thyroid cancer, benign nodule, goitre or multiple nodules, other (hyperthyroidism, head-neck cancer).

**Main Outcome Measures.** Medical investigations during, prior and after thyroidectomy.

**Results.** A total of 35,367 patients underwent surgery (mean age 51 years, 80% females): 17% had a reported diagnosis of thyroid cancer, 20% benign nodule, 38% goitre or multiple nodules and 25% another diagnosis. The ratio of thyroidectomies with cancer over thyroidectomies with benign nodule was 0.8 and varied across regions. In the year preceding surgery, 82% of patients had an investigation by thyroid ultrasonography, 21% thyroid scintigraphy, 34% fine-needle aspiration cytology, 40% serum calcitonin assay and 54% serum calcium assay. In the following year, all patients with total thyroidectomy and 44% of patients with partial thyroidectomy and a diagnosis of benign nodule were taking thyroid hormone therapy. One hundred patients had been reoperated for a compressive haematoma and 63 died during the first month, half of whom had been operated for cancer. Mean rates of recurrent laryngeal nerve injury and hypocalcaemia (requiring blood tests plus treatments within 4-12 months) were estimated at 1.5% and 3.4%, respectively and were higher in the cancer group (2.3% and 5.7%).

**Conclusion.** This almost nation-wide study demonstrates the suboptimal management of patients prior to thyroidectomy in France. It suggests overdiagnosis and potential harms to patients, and calls for a review of the relevance of thyroidectomy, particularly with regards to microcancers.

## STRENGTHS AND LIMITATIONS OF THIS STUDY

- The Sniiram database includes almost all the insured population in France where medical insurance is mandatory. It is one of the largest administrative databases. It has led to many publications to monitor quality of care, describe health care pathways at a national level and guide public health policies.
- Based on reimbursed data from more than 35,000 patients who underwent thyroidectomy in France in 2010, we document that the care pathway leading to surgery is not optimal and that complications may happen which may result in an alteration of patient's quality of life
- This observational study relies on the quality of the surgical procedure coding performed in public or private hospitals, as these procedure codes are necessary in order to classify the 4 groups: cancer, benign nodule, multiple nodules or goitre, other cases. Misclassifications may have occurred, which are more likely to happen in the case of microcancers considered as benign nodules in our study.
- While ultrasound and histological technologies have led to an increase in the diagnosis of thyroid micronodules and of microcancers that are discovered incidentally and that much discussion is focusing on this issue at an international level, these results call for further advice in the management of thyroid benign nodules and especially for microcancers.

## INTRODUCTION

The prevalence of all forms of thyroid disease is difficult to assess. Published clinical trials are often old and the performances of detection have substantially improved over time,<sup>i</sup>[1] consequently modifying patient management. In countries with sufficient dietary iodine intake, such as France or the USA, the clinical prevalence of thyroid nodules is about 5% and is higher in women (5.3 to 6.4% vs 0.8 to 1.6% for men) and persons over the age of 50 years in whom the prevalence is about 30 to 40%,<sup>ii</sup>[2]. The prevalence of thyroid disease based on ultrasonography screening is much higher and is currently estimated to be 67%<sup>iii</sup>[1,3], comparable to the rate of nodules discovered at autopsy,[1,3,4].

The growing prevalence of thyroid cancer has been clearly established. Over the last three decades, the number of new cases diagnosed in France has increased fivefold in both sexes,[5,6]. This increased prevalence almost exclusively concerns papillary cancers, with no impact on mortality, which has decreased over the same period. Over a period of 20 years, the proportion of microcancers (<10 mm) has increased from 4% to more than 50%. One-half of these microcancers are smaller than 3 mm and are discovered incidentally on thyroidectomy specimens. This increased prevalence of microcancers is directly related to progress in the detection of nodules by increasingly efficient ultrasound machines and progress in the histological diagnosis of cancer as a result of very thin histological sections and the use of immunohistochemistry. In fact, the majority of these microcancers appear to undergo growth arrest, while progression to symptomatic cancer is observed in only 1 out of every 15 nodules. The increased incidence of thyroid cancer is thus due to microcancers and can be considered to constitute a form of overdiagnosis[7]. The diagnosis of thyroid cancer, regardless of stage, results in an alteration of the patient's quality of life and social representation and can be responsible for sometimes unjustified modifications of therapeutic management or potentially morbid treatment follow-up, resulting in increased costs induced by incidentally discovered cancers.

1  
2  
3 Over the last 10 years, several medical authorities have published guidelines for the management of  
4 thyroid nodules and/or thyroid cancers: the European Thyroid Association (ETA) and the American  
5 Association of Clinical Endocrinologists (AACE) in 2006, the British Thyroid Association (BTA) in 2007,  
6  
7 the National Cancer Institute (NCI) in 2008, the American Thyroid Association (ATA) in 2009 and  
8  
9 2015, and the *Société Française d'Endocrinologie* (SFE) in 2011. Despite several differences, all  
10  
11 medical societies recommend TSH assay and thyroid ultrasound in all patients with thyroid disease  
12  
13 combined with fine-needle aspiration cytology of nodules with features suggestive of malignancy  
14  
15 [8,9,10]. According to the *Société Française d'Endocrinologie*, the majority of thyroid incidentalomas  
16  
17 require simple surveillance. The indications for thyroid surgery are rare, limited to nodules  
18  
19 demonstrated to be malignant on preoperative investigations, and very large or retrosternal nodules  
20  
21 (10), symptomatic or unsightly goitre or goitre accompanied by low TSH. Despite existing  
22  
23 international and national recommendations, much concern is being currently raised about  
24  
25 overdiagnosis and an excess of thyroidectomy, which may result in harms to the patients,[7].  
26  
27  
28  
29

30  
31 The objective of this observational study was to analyse the care pathway of patients prior to  
32  
33 thyroidectomy in France during the year 2010 and to study the impact of surgery on postoperative  
34  
35 morbidity and mortality in the Sniiram (French National Health Insurance Information System)  
36  
37 database, a largely published and nationwide comprehensive administrative database of about 56  
38  
39 million people based on medical reimbursement data (11).  
40  
41  
42  
43  
44  
45

## 46 **METHOD**

### 47 **Information system and population**

48  
49 In France, the Sniiram is an anonymous, individual database concerning all the beneficiaries of the  
50  
51 various national health insurance schemes (11,12,13). Medical insurance is mandatory and is  
52  
53 provided by the State for low income people. Many published studies have been based on the  
54  
55  
56  
57  
58  
59  
60

1  
2  
3 Sniiram which stands among the largest medico-administrative databases worldwide and is largely  
4  
5 used to guide public health policies in France as these data allow the systematic follow-up of all  
6  
7 medical care received by the population (12-13). It exhaustively records all reimbursed prescriptions  
8  
9 and outpatient services and procedures, as well as their date, over the previous three years plus the  
10  
11 current year. Identification of medicinal products is based on the ATC code (Anatomical Therapeutic  
12  
13 Classification), that of laboratory examinations is based on the national laboratory test coding table  
14  
15 and that of procedures is based on the *Classification Commune des Actes Médicaux* (CCAM)  
16  
17 [common classification of medical procedures]. The Sniiram does not contain any clinical data  
18  
19 concerning the results related to prescriptions or examinations, but it nevertheless includes  
20  
21 information on the possible presence of long-term diseases (LTD), such as cancers, eligible for 100%  
22  
23 reimbursement of healthcare expenditure following approval by a national health insurance  
24  
25 physician. These LTD are coded according to the international classification of diseases (ICD 10). A  
26  
27 unique and anonymous identification number for each person also allows integration into the  
28  
29 Sniiram database of the hospital discharge database (PMSI, *Programme de médicalisation des*  
30  
31 *systèmes d'information*). The principal diagnoses and associated diagnoses recorded in the PMSI are  
32  
33 coded according to the ICD 10 and the procedures performed, such as thyroidectomies, are coded  
34  
35 according to the CCAM.  
36  
37  
38  
39

40  
41 In 2010, the national health insurance general scheme (excluding local mutualist sections that  
42  
43 provide medical insurance for e.g., students, teachers) covered about 77% of the 65 million  
44  
45 inhabitants in France including low-income people and was the only scheme for which both vital  
46  
47 status and LTD were comprehensively recorded at that time. Data for the health insurance general  
48  
49 scheme beneficiaries who underwent thyroid surgery in 2010 were extracted from the Sniiram  
50  
51 database. The diagnoses recorded during the hospital stay, and the clinical examinations and  
52  
53 complementary investigations performed one year before and one year after surgery, estimated by  
54  
55 reimbursement data, were analysed. In order to establish an estimate for France as a whole, the  
56  
57  
58  
59  
60



1  
2  
3 sample sizes of general scheme beneficiaries undergoing thyroid surgery were extrapolated (by age-  
4  
5 group and gender) to the national estimates provided by Insee (*Institut national de la statistique et*  
6  
7 *des études économiques*) for the total population of France in January 2011. For the purposes of  
8  
9 regional comparisons, regional rates of the general scheme were standardized for the age and  
10  
11 gender structure of the Insee total population of France in January 2011.  
12

13  
14 Patients who had undergone thyroidectomy were classified into four exclusive groups according to  
15  
16 the type of thyroid disease. The first group was composed of patients who had a diagnosis of thyroid  
17  
18 cancer recorded in the databases. This group included patients with ICD 10 codes for malignant  
19  
20 neoplasm of thyroid gland (C73, D09.3), neoplasm of uncertain behaviour of thyroid gland (D44.0),  
21  
22 hypersecretion of calcitonin (E07.0) or multiple endocrine adenomatosis (D44.8) coded during the  
23  
24 hospital stay for thyroidectomy or in the LTD coding, and patients who underwent lymph node  
25  
26 dissection or radioiodine therapy without a diagnosis of hyperthyroidism.  
27  
28

29  
30 The second group was composed of patients who had a recorded diagnosis of benign nodule  
31  
32 according to ICD 10 codes for nontoxic single thyroid nodule (E04.1), benign nodule of the thyroid  
33  
34 gland (D34) or benign tumour of other and unspecified endocrine glands (D35.7, D35.8; D35.9)  
35  
36 during the hospital stay.  
37  
38

39  
40 The third group was composed of patients who had a recorded diagnosis of goitre or multiple  
41  
42 nodules on the basis of ICD 10 codes for nontoxic diffuse goitre (E04.0), nontoxic multinodular goitre  
43  
44 (E04.2), other specified nontoxic goitre (E04.8), nontoxic goitre, unspecified (E04.9), congenital  
45  
46 hypothyroidism with diffuse goitre (E03.0), dysmorphogenetic goitre (E07.1), or iodine-deficiency-  
47  
48 related goitre (E01.0, E01.1, E01.2).  
49

50  
51 Finally, the fourth group comprised patients who had another recorded diagnosis, especially head  
52  
53 and neck cancer and hyperthyroidism. These patients were excluded from the subsequent analysis,  
54  
55 as thyroidectomy was simply an associated procedure or was performed for hyperthyroidism.  
56  
57

### Definitions and statistical analysis

The care pathway was analysed in rolling years, 12 months before and 12 months after the date of thyroidectomy. A thyroidectomy frequency ratio was calculated between group 1 (cancer) and group 2 (benign nodule), overall and by region. In order to study regional variability, data were adjusted for the age and gender of the population of beneficiaries at December 31, 2010. Drug treatments were identified by the presence of at least three reimbursements over the 12-month period before and then the 12-month period after hospitalisation. Thyroid ultrasonography, fine-needle aspiration cytology and scintigraphy were identified by the presence of specific codes, whether they were performed in a hospital outpatient department or in private practice. However, the procedures performed during a public hospital stay were not systematically coded at that time, possibly resulting in missing data. Similarly, laboratory tests performed during a public hospital stay were not identified, as they are not reimbursed individually. Reimbursements for hospital outpatient and private practice endocrinology and visits to an ear-nose-throat (ENT) specialist were taken into account. There again, ambulatory visits to a public hospital specialist were not systematically coded at that time, possibly resulting in missing data. Postoperative sick leave allowances were also taken into account.

Complications were identified during the thyroidectomy hospital stay and over the following year from hospitalisation and/or ambulatory reimbursement data. Severe complications were defined by the development of compressive haematoma during the thyroidectomy hospital stay, death (in-hospital or during the first month), or the presence of a CCAM procedure supposedly related to thyroidectomy (tracheobronchial stent, tracheotomy, arytenoidectomy, etc.). Readmissions for thyroid problems or for phosphorus-calcium imbalance were also identified. Various indicators that could also constitute markers of late ENT complications were constructed: at least 2 visits to an ENT specialist, at least 1 visit to a speech therapist, laryngeal function tests looking for recurrent laryngeal nerve injury, laryngoscopy, etc, over the 12-month period. Hypoparathyroidism was suspected by the

1  
2  
3 presence of at least 3 serum calcium assays and at least 3 deliveries of calcium supplements over the  
4  
5 period ranging from 4 to 12 months after surgery (to avoid selecting very transient  
6  
7 hypoparathyroidism), or the presence of hospitalisation with a diagnosis of hypoparathyroidism over  
8  
9 the 12-month period.  
10

11  
12 Finally, the numbers of patients who had undergone thyroidectomy and those with LTD for thyroid  
13  
14 cancer from 2010 to 2013 were analysed in order to estimate temporal trends.  
15

16  
17 Statistical analyses were performed with SAS software (SAS Enterprise Guide, version 4.3, SAS  
18  
19 Institute Inc, Cary, NC, USA). Analyses of the SNIIRAM database have been approved by the French  
20  
21 personal data protection agency (*Commission Nationale Informatique et Libertés*). Because the  
22  
23 SNIIRAM database is anonymous, no other ethical approval was required for this study.  
24  
25  
26  
27  
28  
29  
30  
31  
32  
33  
34  
35  
36  
37  
38  
39  
40  
41  
42  
43  
44  
45  
46  
47  
48  
49  
50  
51  
52  
53  
54  
55  
56  
57  
58  
59  
60

## RESULTS

A total of 35,367 health insurance general scheme beneficiaries underwent thyroid surgery in 2010, i.e. by extrapolation, about 45,800 people in the overall French population. Patient characteristics and characteristics of the surgical procedures performed are reported in Table 1.

**Table 1 - Characteristics of the 35,367 health insurance general scheme beneficiaries who underwent thyroidectomy in 2010, by the type of thyroid diagnosis, Sniiram, France.**

|                                                                  | Cancer<br>N=5,979<br>(17%) | Benign nodule<br>N=7,270<br>(20%) | Multiple nodules<br>and goitre<br>N=13,350<br>(38%) | Others<br>N=8,768<br>(25%) |
|------------------------------------------------------------------|----------------------------|-----------------------------------|-----------------------------------------------------|----------------------------|
| Age < 20 years                                                   | 1.4%                       | 1.6%                              | 0.4%                                                | 1.0%                       |
| Age < 50 years                                                   | 47%                        | 53%                               | 40%                                                 | 44%                        |
| Women                                                            | 76%                        | 79%                               | 83%                                                 | 79%                        |
| Thyroidectomy                                                    |                            |                                   |                                                     |                            |
| - total or subtotal                                              | 77%                        | 26%                               | 85%                                                 | 79%                        |
| - partial                                                        | 11%                        | 71%                               | 12%                                                 | 18%                        |
| - completion                                                     | 12%                        | 3%                                | 3%                                                  | 3%                         |
| Surgery performed in a public hospital                           | 54%                        | 38%                               | 46%                                                 | 54%                        |
| Surgery practiced in a public or private hospital that performed |                            |                                   |                                                     |                            |
| < 30 thyroid surgeries / year                                    | 16%                        | 24%                               | 17%                                                 | 15%                        |
| > 100 thyroid surgeries / year                                   | 51%                        | 37%                               | 41%                                                 | 55%                        |

Patients with a diagnosis of multiple nodules or goitre represented the largest subgroup (38% of patients), followed by those with a benign nodule (20%) and those with thyroid cancer, regardless of the stage (17%). One quarter of patients had another type of diagnosis, mainly head and neck cancer or hyperthyroidism. Each of these subgroups comprised 80% women with a mean age of 51 years.

1  
2  
3 Total thyroidectomy (or completion thyroidectomy) was performed for about 89% of patients with a  
4  
5 postoperative diagnosis of thyroid cancer and 86% of cases of multiple nodules or goitres, while  
6  
7 partial thyroidectomy was performed in 71% of patients with benign nodules. Patients were more  
8  
9 frequently operated in private or public hospitals with high thyroid surgery rates, especially when  
10  
11 they had a diagnosis of thyroid cancer or multiple nodules or goitres.  
12

13  
14 The frequency of thyroidectomy with a diagnosis reported as thyroid cancer, nodule or goitre in 2010  
15  
16 (excluding thyroidectomies for head and neck cancer or hyperthyroidism) was 7.1 per 10,000  
17  
18 inhabitants and varied according to regions between 5.3 and 10.7 per 10,000 inhabitants. In patients  
19  
20 20 years and older, the ratio of the number of thyroidectomies with a diagnosis of cancer over the  
21  
22 number of thyroidectomies with a diagnosis of benign nodule was 0.8. This ratio varied between  
23  
24 regions from 0.5 in Basse-Normandie, Bretagne, Limousin and Languedoc-Roussillon to 2.6 in Nord-  
25  
26 Pas-de-Calais.  
27  
28

29  
30 During the year preceding thyroid surgery, the health care varied according to the group. Eighty  
31  
32 percent of patients of group 1 (n=5,979) who finally had a diagnosis of thyroid cancer had evidence of  
33  
34 investigation by thyroid ultrasonography and 44% by fine-needle aspiration cytology (Table 2) prior  
35  
36 to surgery. In group 2 (n=7,270), corresponding to patients who had a recorded diagnosis of benign  
37  
38 nodule, the fine-needle aspiration cytology rate was 34%.  
39  
40  
41  
42  
43  
44  
45  
46  
47  
48  
49  
50  
51  
52  
53  
54  
55  
56  
57  
58  
59  
60

**Table 2 - Pre-thyroidectomy care pathway (previous 12 months prior surgery in 2010), by the type of thyroid diagnosis, Sniiram, France.**

|                                                | Cancer<br>N=5,979 | Benign<br>nodule<br>N=7,270 | Multiple<br>nodules<br>and goitre<br>N=13,350 | Cancer /<br>Benign<br>nodule ratio | Cancer /<br>Goitre ratio |
|------------------------------------------------|-------------------|-----------------------------|-----------------------------------------------|------------------------------------|--------------------------|
| Thyroid ultrasound                             | 80%               | 84%                         | 82%                                           | 1.0                                | 1.0                      |
| Fine-needle aspiration cytology of the thyroid | 44%               | 34%                         | 23%                                           | 1.3                                | 1.9                      |
| Thyroid scintigraphy                           | 18%               | 21%                         | 22%                                           | 0.9                                | 0.8                      |
| <i>At least one of the 3</i>                   | 89%               | 91%                         | 88%                                           | 1.0                                | 1.0                      |
| TSH assay                                      | 89%               | 91%                         | 92%                                           | 1.0                                | 1.0                      |
| T3 assay                                       | 36%               | 35%                         | 37%                                           | 1.0                                | 1.0                      |
| T4 assay                                       | 63%               | 65%                         | 66%                                           | 1.0                                | 1.0                      |
| Calcitonin assay                               | 44%               | 39%                         | 39%                                           | 1.1                                | 1.1                      |
| Calcium assay                                  | 58%               | 50%                         | 55%                                           | 1.2                                | 1.1                      |
| <i>No T3, T4 or TSH assay</i>                  | 10%               | 8%                          | 8%                                            | 1.2                                | 1.3                      |
| ≥ 3 thyroid hormone deliveries                 | 21%               | 16%                         | 19%                                           | 1.3                                | 1.1                      |
| ≥ 1 endocrinology consultation                 | 49%               | 44%                         | 49%                                           | 1.1                                | 1.0                      |
| ≥ 1 ear-nose-throat specialist consultation    | 43%               | 49%                         | 43%                                           | 0.9                                | 1.0                      |

In the 3 groups of patients, TSH assays had been performed in about 90% of patients, T4 assay in more than 63% , T3 assay in more than 35% and a thyroid scintigraphy in more than 18%, prior to surgery. Serum calcitonin assay had been performed in 44% of patients and serum calcium assay in 58% of patients who finally had a diagnosis of thyroid cancer. These proportions were 39% and 50%, respectively, for patients with a diagnosis of benign nodule. Less than one-half of patients, regardless of their thyroid disease, were referred to an endocrinologist. Finally, neither thyroid ultrasonography nor fine-needle aspiration cytology was performed in 10% of patients, neither T3, T4 nor TSH assay was performed in about 9% of patients in groups 1 and 2.

The fine-needle aspiration cytology rate varied according to the region and was probably related to the availability of doctors able to perform this technique and cytopathologists. Among the patients who had undergone surgery and had a diagnosis of thyroid cancer or benign nodule, the fine-needle aspiration cytology rate was 53% in patients from Ile-de-France and Rhône-Alpes, but only 10% in those from Franche-Comté (and 0% in Guyane for only 28 operated patients).

During the 12 months following surgery, TSH assay was performed in almost all patients (Table 3). T3 assay was performed in 51% of patients with thyroid cancer, while the rate of total thyroidectomy in this group was 76%. T3 assay was also performed in 26% of patients with a diagnosis of benign nodule, but the rate of partial thyroidectomy in this group was 71%. Thyroid hormone replacement therapy was administered to all patients who had undergone total thyroidectomy and in 44% of patients who had undergone partial thyroidectomy and had a diagnosis of benign nodule. The endocrinologist referral rate remained low: 56% of patients with thyroid cancer and 34% of patients with benign nodule consulted an endocrinologist. The mean duration of sick leave for employed patients was 89 days for patients with thyroid cancer and 38 days for patients with benign nodules. Sick leave lasted more than 3 weeks in 60 to 81% of cases, depending on the group.

**Table 3 - Post-thyroidectomy care pathway (following 12 months after surgery in 2010), by the type of thyroid diagnosis, Sniiram, France.**

|                                                  | Cancer<br>N=5,979 | Benign<br>nodule<br>N=7,270 | Multiple<br>nodules<br>and goitre<br>N=13,350 | Cancer /<br>Benign<br>nodule ratio | Cancer /<br>Goitre ratio |
|--------------------------------------------------|-------------------|-----------------------------|-----------------------------------------------|------------------------------------|--------------------------|
| TSH assay                                        | 96%               | 93%                         | 97%                                           | 1.0                                | 1.0                      |
| T3 assay                                         | 51%               | 26%                         | 28%                                           | 2.0                                | 1.9                      |
| T4 assay                                         | 76%               | 63%                         | 68%                                           | 1.2                                | 1.1                      |
| Levothyroxine replacement therapy                | 95%               | 58%                         | 92%                                           | 1.6                                | 1.0                      |
| In those with total thyroidectomy                | 99%               | 97%                         | 99%                                           | 1.0                                | 1.0                      |
| In those with partial thyroidectomy              | 73%               | 44%                         | 48%                                           | 1.7                                | 1.5                      |
| ≥ 1 endocrinology consultation                   | 56%               | 34%                         | 39%                                           | 1.7                                | 1.4                      |
| ≥ 1 ear-nose-throat specialist consultation      | 33%               | 36%                         | 32%                                           | 0.9                                | 1.0                      |
| In patients with at least one day of sick leave: |                   |                             |                                               |                                    |                          |
| mean number of days/patient                      | 89 days           | 38 days                     | 45 days                                       | 2.3                                | 2.0                      |
| % of patients, with                              |                   |                             |                                               |                                    |                          |
| > 10 days of sick leave                          | 96%               | 94%                         | 97%                                           | 1.0                                | 1.0                      |
| >14 days of sick leave                           | 93%               | 85%                         | 93%                                           | 1.1                                | 1.0                      |
| >21 days of sick leave                           | 81%               | 60%                         | 75%                                           | 1.4                                | 1.1                      |

Severe complications of thyroid surgery were rare (Table 4). About twenty patients, 14 in the cancer group and less than 10 in the multiple nodules and goitre group (none in the benign nodule group), died in hospital; another 11 patients died during the first 30 days after surgery, i.e. an overall short-term mortality of about 30 patients. The cause of death is not indicated in these administrative

databases. One hundred patients, 25 in the cancer group and 75 all together in the benign nodule group and the goitre group, experienced postoperative compressive haematoma requiring reoperation. This compressive haematoma rate (0.4%) did not appear to be related to the underlying thyroid disease or to the type of surgical procedure performed, such as radical thyroidectomy or lymph node dissection.

**Table 4 – Immediate and late complications of thyroidectomy performed in 2010, by the type of thyroid diagnosis, Sniiram, France.**

|                                                                                       | Cancer<br>N=5,979 | Benign<br>nodule<br>N=7,270 | Multiple<br>nodules<br>and goitre<br>N=13,350 | Cancer /<br>Benign<br>nodule ratio | Cancer /<br>Goitre ratio |
|---------------------------------------------------------------------------------------|-------------------|-----------------------------|-----------------------------------------------|------------------------------------|--------------------------|
| <b>Immediate complications</b>                                                        |                   |                             |                                               |                                    |                          |
| <b>During the hospitalisation:</b>                                                    |                   |                             |                                               |                                    |                          |
| Mean length of stay > 3 days                                                          | 42%               | 29%                         | 39%                                           | 1.4                                | 1.1                      |
| Compressive haematoma                                                                 | 0.4% (n=25)       | 0.3% (n=23)                 | 0.4% (n=52)                                   | 1.3                                | 1.0                      |
| Mortality                                                                             | 0.2% (n=14)       | 0.0% (n=0)                  | 0.0% (n<10)                                   | -                                  | -                        |
| One-month mortality                                                                   | 0.3% (n=19)       | 0.0% (n<10)                 | 0.1% (n=10)                                   | -                                  | -                        |
| <b>Late complications</b>                                                             |                   |                             |                                               |                                    |                          |
| <b>Severe complications*</b>                                                          | 1.4% (n=84)       | 0.4% (n=32)                 | 0.6% (n=86)                                   | 3.5                                | 2.3                      |
| <b>Other complications during the first year</b>                                      |                   |                             |                                               |                                    |                          |
| - At least 2 ear-nose-throat specialist consultations                                 | 15%               | 13%                         | 11%                                           | 1.2                                | 1.3                      |
| - At least 1 speech therapy session                                                   | 8.8%              | 4.1%                        | 6.5%                                          | 2.1                                | 1.4                      |
| - Testing for recurrent laryngeal nerve injury**                                      | 2.3% (n=137)      | 1.2% (n=90)                 | 1.2% (n=164)                                  | 1.9                                | 1.9                      |
| <i>At least 1 of these complications</i>                                              | 23%               | 17%                         | 17%                                           | 1.3                                | 1.3                      |
| <b>Hypoparathyroidism complications</b>                                               |                   |                             |                                               |                                    |                          |
| - At least 3 serum calcium assays and at least 3 deliveries of calcium supplements*** | 5.7%              | 1.0%                        | 3.5%                                          | 5.7                                | 1.6                      |
| - Readmission for hypoparathyroidism                                                  | 0.2% (n=11)       | 0% (n=0)                    | 0% (n=0)                                      | -                                  | -                        |
| <i>At least 1 hypoparathyroidism complication</i>                                     | 5.8%              | 1.0%                        | 3.5%                                          | 5.8                                | 1.7                      |
| <i>At least 1 complication or hypoparathyroidism</i>                                  | 27%               | 18%                         | 20%                                           | 1.5                                | 1.3                      |
| <b>Other readmissions for</b>                                                         |                   |                             |                                               |                                    |                          |
| - Thyroid disorders                                                                   | 6.4%              | 1.4%                        | 2.2%                                          | 4.6                                | 2.9                      |
| - Hypercalcaemia                                                                      | 1.2% (n=71)       | 0.1% (n<10)                 | 0.1% (n=18)                                   | -                                  | -                        |

\* Tracheobronchial stent, tracheotomy, arytenoidectomy, etc.

\*\* Laryngeal function tests, indirect laryngoscopy, etc.

\*\*\* during the 4th to 12th months after thyroidectomy.

The late complication rate was estimated by the number of specialist visits or procedures, or the readmission rate during the year following surgery. Patients with more than 2 ENT or speech therapy visits and patients in whom a laryngeal procedure was performed were considered to have experienced a laryngeal complication. The late complication rate varied according to the group from



1  
2  
3 17% to 23%, and the recurrent laryngeal nerve injury rate varied from 2.3% to 1.2%. Patients in  
4  
5 whom more than 3 serum calcium assays were performed and to whom calcium supplements were  
6  
7 dispensed more than three times during the 4<sup>th</sup> to the 12<sup>th</sup> month following surgery were considered  
8  
9 to suffer from persistent hypoparathyroidism. This hypoparathyroidism rate ranged from 5.7% for  
10  
11 the thyroid cancer group to 1% for the nodule group. The readmission rate in the thyroid cancer  
12  
13 group was higher for hypercalcaemia than for hypocalcaemia: 1.2% and 0.2%, respectively.  
14  
15

16  
17 Between 2010 and 2012, the number of patients who had undergone thyroidectomy increased by  
18  
19 400 patients each year, from about 35,400 in 2010 to 36,200 in 2012, i.e. a mean annual growth rate  
20  
21 of +1.1%. This trend was reversed between 2012 and 2013, as the number of patients decreased by  
22  
23 900 patients to 35,300, i.e. a growth rate of -2.6%. The number of patients with LTD 100% health  
24  
25 insurance cover for thyroid cancer increased from 63,311 in 2011, to 65,401 in 2012 and 67,461 in  
26  
27 2013, i.e. a mean annual growth rate of +3.2%. In parallel, between 2010 and 2013 among all general  
28  
29 scheme beneficiaries, the number of thyroid ultrasonography examinations performed increased  
30  
31 from 1.12 million to 1.19 million (+2.2%/year) and the number of thyroid fine-needle aspiration  
32  
33 cytology procedures increased from 89,000 to 98,000 (+3.4%/year), while the number of thyroid  
34  
35 scintigraphies decreased from 66,000 to 58,500 (-3.8%/year). The number of TSH assays (alone or  
36  
37 combined with other parameters) increased from 12.2 million to 14.8 million (+7%/year), while the  
38  
39 number of free T4 assays (alone or combined with other parameters) increased from 3.0 million to  
40  
41 3.6 million (+7%/year), and the number of free T3 assays (alone or combined with other parameters)  
42  
43 also increased from 1.0 million to 1.3 million (+10%/year).  
44  
45  
46  
47  
48  
49  
50  
51  
52  
53  
54  
55  
56  
57  
58  
59  
60

## DISCUSSION

This observational and almost nation-wide study based on more than 35,000 patients first demonstrates the suboptimal management of patients prior to thyroidectomy in France. The thyroidectomy rate with a diagnosis of benign nodule appears to be excessively high compared to the thyroidectomy rate with a diagnosis of thyroid cancer. Furthermore, these rates vary considerably from one region to another, documenting variations in clinical practices across the country. Fine-needle aspiration cytology before surgery for a suspicious thyroid nodule is performed in less than one-half of cases, while this procedure could avoid surgery for a certain number of patients, which, as shown by this study as well as other studies, is not devoid of complications. Secondly, some examinations are performed too frequently, such as preoperative thyroid scintigraphy and T4 assay, and preoperative and postoperative T3 assay. Therefore these data suggest that suboptimal management prior to thyroidectomy leads to overdiagnosis and potential harms to patients,[7] as well as a lack of efficiency for the medical insurance system.

The volume of data collected from a database covering 77% of the French population allows us to analyse the health care pathway and evaluate its health impact, as medical insurance is mandatory and the Sniiram database records the follow-up of all patients [11-13]. Although guidelines [8-10] do not specify a maximum interval between preoperative assessment and thyroid surgery, the one-year interval adopted for this study appears to be reasonable. Some non-surgical procedures considered to be necessary to the preoperative and postoperative care pathways may not have been identified from the Sniiram database when they were performed during a public hospital stay as they are not systematically coded within the hospital when they do not provide higher funding to the hospital. However, these non-surgical procedures to investigate thyroid disease are rarely performed during a hospital stay. More importantly, the quality of this study relies on the quality of the surgical

1  
2  
3 procedure coding performed in public or private hospitals, as these procedure codes are necessary in  
4  
5 order to classify the 4 groups of thyroidectomies: cancer, benign nodule, multiple nodules or goitre,  
6  
7 other cases. Other data were therefore investigated, such as requests for LTD coverage for thyroid  
8  
9 cancer, reimbursement for radioiodine therapy or lymph node dissection, to isolate cancer cases.  
10  
11 Nevertheless, it is still possible that the group described as surgery with a diagnosis of benign nodule  
12  
13 included few cases of thyroid cancer, which are more likely to be microcancers.  
14  
15

16  
17  
18  
19  
20 Despite a number of differences, all guidelines [8-10] recommend a basic work-up in patients with  
21  
22 any form of thyroid disease, comprising TSH assay to detect thyroid dysfunction, specific thyroid  
23  
24 ultrasonography to map and characterise the nodule, followed, if necessary, by a fine-needle  
25  
26 aspiration cytology targeted to suspicious nodules, whenever they are sufficiently large to allow this  
27  
28 procedure. In France, the *Société française d'endocrinology* like other medical societies,[8-10]  
29  
30 published guidelines for the management of thyroid nodules to preoperatively determine the nature  
31  
32 of the nodules and their potential for progression starting at least in 2008. The French guidelines  
33  
34 were published in 2010, during the study period. Our analyses show that the thyroidectomy rate  
35  
36 started to decline between 2012 and 2013 (-900 thyroidectomies), although the number of patients  
37  
38 with 100% fee coverage for thyroid cancer as LTD continued to increase. There therefore appears to  
39  
40 be both an effect and latency in the diffusion of knowledge concerning the management of thyroid  
41  
42 nodules.  
43  
44

45  
46 TSH assay must be performed as first-line assessment of thyroid disease, as its sensitivity allows the  
47  
48 detection of all cases of thyroid dysfunction [10]. T4 assay should only be requested as second-line  
49  
50 test, together with T3 when TSH is low, and together with anti-TPO antibody assay when TSH is high  
51  
52 [10]. However, in 2010, T4 assay was performed in almost two-thirds of patients and T3 assay in  
53  
54 more than one-third of patients prior to thyroidectomy with thyroid cancer or benign nodule.  
55  
56

1  
2  
3 Similarly, thyroid scintigraphy is no longer indicated in euthyroid patients [10], but it was performed  
4  
5 prior to thyroidectomy in almost one in five patients who had thyroid cancer or benign nodule.  
6  
7

8 On the other hand, thyroid ultrasonography is an essential part of the diagnostic work-up [8-10,14].  
9  
10 It was frequently performed in our study, but only in 80% to 84% of cases rather than 100% of cases,  
11  
12 as other diagnostic examinations may have been performed: neck vessel ultrasonography, neck CT  
13  
14 scan or MRI, for example, which also suggests the possibility of incidentalomas, i.e. incidentally  
15  
16 discovered nodules. The Tirads score, proposed in 2009 [15], can be used to evaluate the ultrasound  
17  
18 risk of malignancy by taking 6 features into account. Based on a series of 4,550 operated nodules, the  
19  
20 sensitivity of the Tirads score to detect malignant lesions varied from 87% to 95%, with a negative  
21  
22 predictive value of 99%, and an excellent inter-observer reproducibility,[3,15]. Use of the Tirads score  
23  
24 therefore allows fine-needle aspiration cytology to be reserved for nodules with an elevated Tirads  
25  
26 score. It was however impossible in our data to determine the percentage of patients in whom this  
27  
28 score may have limited the indications for fine-needle aspiration cytology.  
29  
30  
31

32 Fine-needle aspiration cytology is recommended for all nodules associated with a high-risk context,  
33  
34 all suspicious nodules or nodules larger than 2 cm, before deciding on the indication for surgery [10].  
35  
36 However, fine-needle aspiration cytology was performed in less than one-half of patients operated  
37  
38 with a diagnosis of thyroid cancer (44%) or benign nodule (34%).  
39  
40  
41

42 The percentage of patients receiving postoperative levothyroxine replacement therapy appears to be  
43  
44 consistent with the surgical procedure performed, as this rate was 99% among patients who had  
45  
46 undergone total thyroidectomy. Levothyroxine therapy rates after partial thyroidectomy were 73% in  
47  
48 the thyroid cancer group and 44% in the nodule group. The expected hypothyroidism rate after  
49  
50 partial thyroidectomy has been estimated by others to be 11% [16], but this figure must be adjusted  
51  
52 to the volume of thyroid parenchyma left, which is not available in our study. T4 assay was  
53  
54 performed at least once in more than two-thirds of patients. At least one T3 assay was performed in  
55  
56  
57  
58  
59  
60

1  
2  
3 more than one-fourth of patients after surgery. Although a proportion of patients require adjustment  
4  
5 of thyroid hormone replacement therapy, T3 assay appears to be inappropriate and generates a  
6  
7 considerable excess cost.  
8  
9

10 This excess cost must be added to sick leave allowances received by employed patients. Guidelines  
11  
12 for practitioners were introduced in France in 2010 to recommend sick leave of 10 to 15 days after  
13  
14 thyroidectomy. In our study, more than 85% of patients received sick leave allowances for more than  
15  
16 14 days and more than 60% received sick leave allowances for more than 21 days. However, the  
17  
18 specific reasons for extension of sick leave (i.e. difficulties adjusting replacement therapy,  
19  
20 complications of surgery or other causes) are not recorded in the Sniiram database.  
21  
22  
23

24 The postoperative or short-term mortality rates and the rate of compressive haematoma requiring  
25  
26 reoperation, 0.1% and 0.4%, respectively, are situated in the lower end of the ranges reported in the  
27  
28 literature. The postoperative bleeding rate reported in the literature ranges from 0 to 6.5% [17,18].  
29  
30 In 2014, Weiss et al. reported a compressive haematoma rate of 1.25% in a series of 150,012 patients  
31  
32 [19]. Compressive haematoma is associated with a 2.9-fold increased risk of mortality, as mortality  
33  
34 rates were 1.34% in the presence of haematoma vs 0.32% for the overall group. Some authors  
35  
36 consider that thyroid cancer is associated with an increased risk of haematoma,[20] but such an  
37  
38 association was not observed in our cohort. Compressive haematoma can be life-threatening and  
39  
40 requires emergency decompression. It can also occur beyond the 6th postoperative hour. The  
41  
42 *Association Francophone de Chirurgie Endocrinienne* (AFCE) has recently recommended that total  
43  
44 thyroidectomy should not be performed as an ambulatory procedure [21].  
45  
46  
47

48 Hypoparathyroidism and recurrent laryngeal nerve injuries were the most common complications of  
49  
50 thyroidectomy. In the present study, the estimated hypoparathyroidism rate between 4 months and  
51  
52 1 year after surgery was 6% in the thyroid cancer group and 1% in the benign nodule group, on the  
53  
54 basis of more than 3 serum calcium assays and more than 3 deliveries of calcium supplements. The  
55  
56  
57  
58  
59  
60

1  
2  
3 recurrent laryngeal nerve injury rate is more difficult to estimate: 9% and 4% of patients in the 2  
4  
5 groups attended speech therapy sessions, and 23% and 17% attended at least 2 ENT visits or speech  
6  
7 therapy sessions or underwent functional testing for recurrent laryngeal nerve injuries during the  
8  
9 first 12 postoperative months. The complication rate depends on the time since the operation, the  
10  
11 mode of detection and the definition of postoperative complications. For example, Duclos et al.,  
12  
13 using a serum calcium cut-off of 2mmol/L, reported postoperative hypoparathyroidism and  
14  
15 permanent hypoparathyroidism rates of 25.9% and 2.7%, respectively [22]. The unilateral or bilateral  
16  
17 recurrent laryngeal nerve injury rate varies according to the time since the operation, 2.3% after one  
18  
19 year vs 9.8% immediately postoperatively, and the mode of detection, less than 2% without specific  
20  
21 examination vs more than 6% when indirect laryngoscopy is performed [23]. Our estimations are  
22  
23 based on an indirect approach, which can overestimate or underestimate the true complication rate.  
24  
25  
26  
27  
28  
29

### 30 **Conclusion**

31  
32  
33 With more than 35,400 general scheme beneficiaries (or about 45,800 nation-wide) who underwent  
34  
35 surgery in 2010, and 35,300 in 2013, thyroidectomy is one of the surgical procedures most commonly  
36  
37 performed in France. The thyroidectomy rate with a diagnosis of benign nodule appears to be  
38  
39 excessively high compared to the thyroidectomy rate with a diagnosis of thyroid cancer. Such  
40  
41 assessment is likely to be shared by many European countries [7]. Partial compliance with guidelines  
42  
43 prior to thyroidectomy, especially the low rate of fine-needle aspiration cytology, indicates the need  
44  
45 for large-scale diffusion of current guidelines and clinical practice evaluation by all professionals  
46  
47 involved in the care pathway. Several actions have been initiated by the French national health  
48  
49 insurance in 2015 to reduce potential harms from overdiagnosis and overtreatment. Specific  
50  
51 booklets have been developed for general practitioners and patients [24]. Dedicated visits to general  
52  
53 practitioners, specialists and surgeons are performed. Public or private hospitals with a low ratio of  
54  
55  
56  
57  
58  
59  
60

1  
2  
3 thyroidectomies with a diagnosis of cancer over thyroidectomies with a diagnosis of benign nodule  
4  
5 are monitored. An international review of the relevance of thyroidectomy and assessment of the  
6  
7 long-term risk of microcancers is necessary in view of changing international clinical practices [7].  
8  
9  
10  
11  
12  
13  
14  
15  
16  
17  
18  
19  
20  
21  
22  
23  
24  
25  
26  
27  
28  
29  
30  
31  
32  
33  
34  
35  
36  
37  
38  
39  
40  
41  
42  
43  
44  
45  
46  
47  
48  
49  
50  
51  
52  
53  
54  
55  
56  
57  
58  
59  
60

For peer review only

**AUTHOR CONTRIBUTION**

**Study concept and design:** Muriel Mathonnet, Anne Cuerq, Chirstophe Tresallet, Jean-Claude Thalabard, Elisabeth Fery-Lemonnier, Philippe Tuppin, Bertrand Millat, Anne Fagot-Campagna

**Interpretation of data:** Muriel Mathonnet, Anne Cuerq, Chirstophe Tresallet, Jean-Claude Thalabard, Elisabeth Fery-Lemonnier, Gilles Russ, Laurence Leenhardt, Claude Bigorgne, Philippe Tuppin, Bertrand Millat, Anne Fagot-Campagna

**Drafting of the manuscript:** Muriel Mathonnet, Anne Cuerq, Anne Fagot-Campagna

**Critical revision of the manuscript for important intellectual content:** Muriel Mathonnet, Anne Cuerq, Chirstophe Tresallet, Jean-Claude Thalabard, Elisabeth Fery-Lemonnier, Gilles Russ, Laurence Leenhardt, Claude Bigorgne, Philippe Tuppin, Bertrand Millat, Anne Fagot-Campagna

**Statistical analysis:** Anne Cuerq

**Study supervision:** Muriel Mathonnet, Bertrand Millat, Anne Fagot-Campagna

All authors give final approval of the version to be published.

The authors have no competing interest.

No additional data are available due to a restrictive access provided by the Commission Nationale Informatique et Libertés (CNIL) to the SNIRAM database.

No specific funding was provided to this study apart from the time of the employees of the medical insurance system and of experts.



## References

- 1- Dean DS, Gharib H. Epidemiology of thyroid nodules. *Best Pract Res Clin Endocrinol Metab* 2008;22:901-11. PMID: 19041821
- 2- Mazzaferri EL. Management of a solitary thyroid nodule. *N Engl J Med* 1993;238:553-9. PMID: 8426623
- 3- Russ G, Leboulleux S, Leenhardt L, et al. Thyroid incidentalomas: epidemiology, risk stratification with ultrasound and workup. *Eur Thyroid J* 2014;3:154-63. doi:10.1159/000365289
- 4- Ezzat S, Sarti DA, Cain DR, et al. Thyroid incidentalomas. Prevalence by palpation and ultrasonography. *Arch Intern Med* 1994;154:1838-40. PMID: 8053752
- 5- Colonna M, Bossard N, Guizard AV, et al. Descriptive epidemiology of thyroid cancer in France: incidence, mortality and survival. *Ann Endocrinol* 2010;71:95-101. doi:10.1016/j.ando.2009.11.006
- 6 - Colonna M, Guizard AV, Schwartz C, et al. A time trend analysis of papillary and follicular cancers as function of tumour size: a study of data from six cancers registries in France (1983-2000). *Eur J Cancer* 2007;43:891-900. PMID:17289376
- 7 - Brito JP, Morris JC, Montori VM. Thyroid cancer: zealous imaging has increased detection and treatment of low risk tumours. *BMJ* 2013;347:f4706. doi: 10.1136/bmj.f4706
- 8- Gharib H, Papini E, Paschke R. Thyroid nodules: a review of current guidelines, practices, and prospects. *Eur J Endocrinol* 2008;159:493-505. doi:10.1530/EJE-08-0135
- 9 - Paschke R, Hegedüs L, Alexander E, et al. Thyroid nodules guidelines: agreement, disagreement and need for future research. *Nat Rev Endocrinol* 2011;7:354-361. doi:10.1038/nrendo.2011.1
- 10- Wémeau JL, Sadoul JL, d'Herbomez M, et al. Recommandations de la Société Française d'Endocrinologie pour la prise en charge des nodules thyroïdiens. *Presse Med* 2011;40:793-826. doi:10.1016/j.lpm.2011.05.001
- 11 - Tuppin P, de Roquefeuil L, Weill A, Ricordeau P, Merliere Y. French national health insurance information system and the permanent beneficiaries sample. *Rev Epidemiol Sante Pub.* Aug 2010;58(4):286-290. PMID: 20598822. doi:10.1016/j.respe.2010.04.005
- 12 - Maura G1, Blotière PO2, Bouillon K2, Billionnet C2, Ricordeau P2, Alla F2, Zureik M2. Comparison of the short-term risk of bleeding and arterial thromboembolic events in nonvalvular atrial fibrillation patients newly treated with dabigatran or rivaroxaban versus vitamin K antagonists: a French nationwide propensity-matched cohort study. *Circulation.* 2015 Sep 29;132(13):1252-60. doi: 10.1161/CIRCULATIONAHA.115.015710.
- 13- Weill A, Dalichampt M, Raguideau F, Ricordeau P, Blotière PO, Rudant J, Alla F, Zureik M. Low dose oestrogen combined oral contraception and risk of pulmonary embolism, stroke, and myocardial infarction in five million French women: cohort study. *BMJ* 2016 May 10;353:i2002. doi: 10.1136/bmj.i2002.

- 1  
2  
3  
4 14 - Horvath E, Majlis S, Rossi R, et al. An ultrasonogram reporting system for thyroid nodules  
5 stratifying cancer risk for clinical management. *J Clin Endocrinol Metab* 2009;94:1748-51.  
6 doi:10.1210/jc.2008-1724  
7
- 8 15 - Russ G, Royer B, Bigorgne C, et al. Prospective evaluation of thyroid Imaging reporting and data  
9 system on 4550 nodules with and without elastography. *Eur J Endocrinol* 2013;168:649-55.  
10 doi:10.1530/EJE-12-0936  
11
- 12 16- Su SY, Grodski S, Serpell JW. Hypothyroidism following hemithyroidectomy: a retrospective  
13 review. *Ann Surg* 2009;250:991-994. doi: 10.1097/SLA.0b013e3181ae5426.  
14
- 15 17- Calo PG, Pisano G, Piga G, et al. Postoperative hematoma after thyroid surgery. Incidence and  
16 risks factors in our experience. *Ann Ital Chir* 2010;81:343-347.  
17
- 18 18- Leyre P, Desurmont T, Lacoste L, et al. Does the risk of compressive hematoma after  
19 thyroidectomy authorize 1-day surgery ? *Langenbecks Arch Surg* 2008;393:733-737.  
20
- 21 19- Weiss A, Lee KC, Brumund KT, et al. Risk factors for hematoma after thyroidectomy: results from  
22 the nationwide inpatient sample. *Surgery* 2014;156:399-404. doi: 10.1016/j.surg.2014.03.015  
23
- 24 20- Promberger R, Ott J, Kober F, et al. Risk factors for postoperative bleeding after thyroid surgery.  
25 *Br J Surg* 2012;99:373-379.  
26
- 27 21- Menegaud F. Ambulatory thyroidectomy: recommendations from the Association Francophone  
28 de Chirurgie Endocrinienne (AFCE). Investigating current practices. *J Visc Surg* 2013;150:165-171. doi:  
29 10.1016/j.jvisc.2013.04.002  
30
- 31 22- Duclos A, Peix JL, Colin C, et al. Influence of experience on performance of individual surgeons in  
32 thyroid surgery: prospective cross-sectional multicentre study. *BMJ* 2012;10. doi:10.1136/BMJD8041  
33
- 34 23- Jeannon JP, Orabi AA, Bruch GA, et al. Diagnosis of recurrent laryngeal nerve palsy after  
35 thyroidectomy: a systematic review. *Int J Clin Pract* 2009;63:624-9  
36
- 37 24- [http://www.ameli.fr/professionnels-de-sante/medecins/exercer-au-quotidien/aide-a-la-](http://www.ameli.fr/professionnels-de-sante/medecins/exercer-au-quotidien/aide-a-la-pratique-memos/les-memos-de-bonne-pratique/nodule-thyroidien-sans-hyperthyroidie.php)  
38 [pratique-memos/les-memos-de-bonne-pratique/nodule-thyroidien-sans-hyperthyroidie.php](http://www.ameli.fr/professionnels-de-sante/medecins/exercer-au-quotidien/aide-a-la-pratique-memos/les-memos-de-bonne-pratique/nodule-thyroidien-sans-hyperthyroidie.php),  
39 consulted 12/28/2015.  
40  
41  
42  
43  
44  
45  
46  
47  
48  
49  
50  
51  
52  
53  
54  
55  
56  
57  
58  
59  
60

## STROBE Statement—checklist of items that should be included in reports of observational studies

|                              | Item No    | Recommendation                                                                                                                                                                                                                                                                                                                                                                                                                                                                                                                                                                                                                                                                                   |
|------------------------------|------------|--------------------------------------------------------------------------------------------------------------------------------------------------------------------------------------------------------------------------------------------------------------------------------------------------------------------------------------------------------------------------------------------------------------------------------------------------------------------------------------------------------------------------------------------------------------------------------------------------------------------------------------------------------------------------------------------------|
| <b>Title and abstract</b>    | 1 P3<br>P3 | (a) Indicate the study's design with a commonly used term in the title or the abstract<br>(b) Provide in the abstract an informative and balanced summary of what was done and what was found                                                                                                                                                                                                                                                                                                                                                                                                                                                                                                    |
| <b>Introduction</b>          |            |                                                                                                                                                                                                                                                                                                                                                                                                                                                                                                                                                                                                                                                                                                  |
| Background/rationale         | 2<br>P5-6  | Explain the scientific background and rationale for the investigation being reported                                                                                                                                                                                                                                                                                                                                                                                                                                                                                                                                                                                                             |
| Objectives                   | 3<br>P6    | State specific objectives, including any prespecified hypotheses                                                                                                                                                                                                                                                                                                                                                                                                                                                                                                                                                                                                                                 |
| <b>Methods</b>               |            |                                                                                                                                                                                                                                                                                                                                                                                                                                                                                                                                                                                                                                                                                                  |
| Study design                 | 4<br>P6-10 | Present key elements of study design early in the paper                                                                                                                                                                                                                                                                                                                                                                                                                                                                                                                                                                                                                                          |
| Setting                      | 5<br>P7+P9 | Describe the setting, locations, and relevant dates, including periods of recruitment, exposure, follow-up, and data collection                                                                                                                                                                                                                                                                                                                                                                                                                                                                                                                                                                  |
| Participants                 | 6<br>P7-9  | (a) <i>Cohort study</i> —Give the eligibility criteria, and the sources and methods of selection of participants. Describe methods of follow-up<br><i>Case-control study</i> —Give the eligibility criteria, and the sources and methods of case ascertainment and control selection. Give the rationale for the choice of cases and controls<br><i>Cross-sectional study</i> —Give the eligibility criteria, and the sources and methods of selection of participants<br>(b) <i>Cohort study</i> —For matched studies, give matching criteria and number of exposed and unexposed<br><i>Case-control study</i> —For matched studies, give matching criteria and the number of controls per case |
| Variables                    | 7<br>P9-10 | Clearly define all outcomes, exposures, predictors, potential confounders, and effect modifiers. Give diagnostic criteria, if applicable                                                                                                                                                                                                                                                                                                                                                                                                                                                                                                                                                         |
| Data sources/<br>measurement | P7         | For each variable of interest, give sources of data and details of methods of assessment (measurement). Describe comparability of assessment methods if there is more than one group                                                                                                                                                                                                                                                                                                                                                                                                                                                                                                             |
| Bias                         | 9<br>P9    | Describe any efforts to address potential sources of bias                                                                                                                                                                                                                                                                                                                                                                                                                                                                                                                                                                                                                                        |
| Study size                   | 10<br>P8   | Explain how the study size was arrived at                                                                                                                                                                                                                                                                                                                                                                                                                                                                                                                                                                                                                                                        |
| Quantitative variables       | 11<br>P8   | Explain how quantitative variables were handled in the analyses. If applicable, describe which groupings were chosen and why                                                                                                                                                                                                                                                                                                                                                                                                                                                                                                                                                                     |
| Statistical methods          | 12<br>P7-8 | (a) Describe all statistical methods, including those used to control for confounding<br>(b) Describe any methods used to examine subgroups and interactions<br>(c) Explain how missing data were addressed<br>(d) <i>Cohort study</i> —If applicable, explain how loss to follow-up was addressed<br><i>Case-control study</i> —If applicable, explain how matching of cases and controls was addressed<br><i>Cross-sectional study</i> —If applicable, describe analytical methods taking account of sampling strategy                                                                                                                                                                         |

1  
2  
3  
4  
5  
6  
7  
8  
9  
10  
11  
12  
13  
14  
15  
16  
17  
18  
19  
20  
21  
22  
23  
24  
25  
26  
27  
28  
29  
30  
31  
32  
33  
34  
35  
36  
37  
38  
39  
40  
41  
42  
43  
44  
45  
46  
47  
48  
49  
50  
51  
52  
53  
54  
55  
56  
57  
58  
59  
60

(e) Describe any sensitivity analyses

Continued on next page

For peer review only

**Results**

|                  |                     |                                                                                                                                                                                                                                                                                                                                                                                                               |
|------------------|---------------------|---------------------------------------------------------------------------------------------------------------------------------------------------------------------------------------------------------------------------------------------------------------------------------------------------------------------------------------------------------------------------------------------------------------|
| Participants     | 13*<br>P10          | (a) Report numbers of individuals at each stage of study—eg numbers potentially eligible, examined for eligibility, confirmed eligible, included in the study, completing follow-up, and analysed<br>(b) Give reasons for non-participation at each stage<br>(c) Consider use of a flow diagram                                                                                                               |
| Descriptive data | 14*<br>Table 1      | (a) Give characteristics of study participants (eg demographic, clinical, social) and information on exposures and potential confounders<br>(b) Indicate number of participants with missing data for each variable of interest<br>(c) <i>Cohort study</i> —Summarise follow-up time (eg, average and total amount)                                                                                           |
| Outcome data     | 15*<br>Tables 2-3-4 | <i>Cohort study</i> —Report numbers of outcome events or summary measures over time<br><i>Case-control study</i> —Report numbers in each exposure category, or summary measures of exposure<br><i>Cross-sectional study</i> —Report numbers of outcome events or summary measures                                                                                                                             |
| Main results     | 16<br>NA            | (a) Give unadjusted estimates and, if applicable, confounder-adjusted estimates and their precision (eg, 95% confidence interval). Make clear which confounders were adjusted for and why they were included<br>(b) Report category boundaries when continuous variables were categorized<br>(c) If relevant, consider translating estimates of relative risk into absolute risk for a meaningful time period |
| Other analyses   | 17<br>Tables 2-3-4  | Report other analyses done—eg analyses of subgroups and interactions, and sensitivity analyses                                                                                                                                                                                                                                                                                                                |

**Discussion**

|                  |              |                                                                                                                                                                            |
|------------------|--------------|----------------------------------------------------------------------------------------------------------------------------------------------------------------------------|
| Key results      | 18<br>P13-14 | Summarise key results with reference to study objectives                                                                                                                   |
| Limitations      | 19<br>P14    | Discuss limitations of the study, taking into account sources of potential bias or imprecision. Discuss both direction and magnitude of any potential bias                 |
| Interpretation   | 20<br>P15-18 | Give a cautious overall interpretation of results considering objectives, limitations, multiplicity of analyses, results from similar studies, and other relevant evidence |
| Generalisability | 21<br>P18    | Discuss the generalisability (external validity) of the study results                                                                                                      |

**Other information**

|         |          |                                                                                                                                                               |
|---------|----------|---------------------------------------------------------------------------------------------------------------------------------------------------------------|
| Funding | 22<br>P2 | Give the source of funding and the role of the funders for the present study and, if applicable, for the original study on which the present article is based |
|---------|----------|---------------------------------------------------------------------------------------------------------------------------------------------------------------|

\*Give information separately for cases and controls in case-control studies and, if applicable, for exposed and unexposed groups in cohort and cross-sectional studies.

**Note:** An Explanation and Elaboration article discusses each checklist item and gives methodological background and published examples of transparent reporting. The STROBE checklist is best used in conjunction with this article (freely available on the Web sites of PLoS Medicine at <http://www.plosmedicine.org/>, Annals of Internal Medicine at <http://www.annals.org/>, and Epidemiology at <http://www.epidem.com/>). Information on the STROBE Initiative is available at [www.strobe-statement.org](http://www.strobe-statement.org).

# BMJ Open

## WHAT IS THE CARE PATHWAY OF PATIENTS WHO UNDERGO THYROID SURGERY IN FRANCE AND ITS POTENTIAL PITFALLS ? A NATIONAL COHORT

|                                 |                                                                                                                                                                                                                                                                                                                                                                                                                                                                                                                                                                                                                                                                                                                                                                                                                                                                                                                                                                                                                                                                                                                                                                                                                                                                                                                                                                    |
|---------------------------------|--------------------------------------------------------------------------------------------------------------------------------------------------------------------------------------------------------------------------------------------------------------------------------------------------------------------------------------------------------------------------------------------------------------------------------------------------------------------------------------------------------------------------------------------------------------------------------------------------------------------------------------------------------------------------------------------------------------------------------------------------------------------------------------------------------------------------------------------------------------------------------------------------------------------------------------------------------------------------------------------------------------------------------------------------------------------------------------------------------------------------------------------------------------------------------------------------------------------------------------------------------------------------------------------------------------------------------------------------------------------|
| Journal:                        | <i>BMJ Open</i>                                                                                                                                                                                                                                                                                                                                                                                                                                                                                                                                                                                                                                                                                                                                                                                                                                                                                                                                                                                                                                                                                                                                                                                                                                                                                                                                                    |
| Manuscript ID                   | bmjopen-2016-013589.R1                                                                                                                                                                                                                                                                                                                                                                                                                                                                                                                                                                                                                                                                                                                                                                                                                                                                                                                                                                                                                                                                                                                                                                                                                                                                                                                                             |
| Article Type:                   | Research                                                                                                                                                                                                                                                                                                                                                                                                                                                                                                                                                                                                                                                                                                                                                                                                                                                                                                                                                                                                                                                                                                                                                                                                                                                                                                                                                           |
| Date Submitted by the Author:   | 02-Dec-2016                                                                                                                                                                                                                                                                                                                                                                                                                                                                                                                                                                                                                                                                                                                                                                                                                                                                                                                                                                                                                                                                                                                                                                                                                                                                                                                                                        |
| Complete List of Authors:       | <p>Mathonnet, Muriel; Hospital of Limoges<br/>Cuerq, Anne; Caisse nationale de l'assurance maladie des travailleurs salariés<br/>Tresallet, Christophe; Pitié-Salpêtrière hospital, Department of general, visceral and endocrine surgery, 47/83 Boulevard de l'Hôpital, 75013 Paris, France<br/>Thalabard, Jean-Christophe; Hospital Cochin, Unit of Gynecology and endocrinology, 53 Avenue de l'Observatoire, 75014 Paris, France<br/>Fery-Lemonnier, Elisabeth; Ministry of Health, 14 avenue Duquesne, 75007 Paris<br/>Russ, Gilles; Pitié Salpêtrière hospital, University Paris VI, Institut E3M, Department of thyroid diseases and endocrine tumors, 83 Boulevard de l'Hôpital, 75013 Paris, France<br/>Leenhardt, Laurence; Pitié Salpêtrière hospital, University Paris VI, Institut E3M, Department of thyroid diseases and endocrine tumors, 83 Boulevard de l'Hôpital, 75013 Paris, France<br/>Bigorgne, Claude; La Pitié Salpêtrière Hospital, Department of Pathology, 83 bd de l'Hôpital, 75651 Paris, France<br/>Tuppin, Philippe; Caisse nationale de l'assurance maladie des travailleurs salariés<br/>Millat, Bertrand; Caisse Nationale d'Assurance Maladie des Travailleurs Salariés<br/>Fagot-Campagna, Anne; Caisse Nationale d'Assurance Maladie des Travailleurs Salariés, Département d'études sur les pathologies et les patients</p> |
| <b>Primary Subject Heading</b>: | Diabetes and endocrinology                                                                                                                                                                                                                                                                                                                                                                                                                                                                                                                                                                                                                                                                                                                                                                                                                                                                                                                                                                                                                                                                                                                                                                                                                                                                                                                                         |
| Secondary Subject Heading:      | Public health, Surgery, Ear, nose and throat/otolaryngology, Epidemiology, Oncology                                                                                                                                                                                                                                                                                                                                                                                                                                                                                                                                                                                                                                                                                                                                                                                                                                                                                                                                                                                                                                                                                                                                                                                                                                                                                |
| Keywords:                       | SURGERY, Thyroid disease < DIABETES & ENDOCRINOLOGY, overdiagnosis, cancer                                                                                                                                                                                                                                                                                                                                                                                                                                                                                                                                                                                                                                                                                                                                                                                                                                                                                                                                                                                                                                                                                                                                                                                                                                                                                         |

1  
2  
3  
4  
5  
6  
7  
8  
9  
10  
11  
12  
13  
14  
15  
16  
17  
18  
19  
20  
21  
22  
23  
24  
25  
26  
27  
28  
29  
30  
31  
32  
33  
34  
35  
36  
37  
38  
39  
40  
41  
42  
43  
44  
45  
46  
47  
48  
49  
50  
51  
52  
53  
54  
55  
56  
57  
58  
59  
60

For peer review only

1  
2  
3 **WHAT IS THE CARE PATHWAY OF PATIENTS WHO UNDERGO THYROID SURGERY IN FRANCE AND**  
4  
5 **ITS POTENTIAL PITFALLS? A NATIONAL COHORT.**  
6  
7

8 Muriel Mathonnet<sup>1</sup> MD PhD, Anne Cuerq<sup>2</sup> MSc, Christophe Tresallet<sup>3</sup> MD PhD, Jean-Christophe  
9  
10 Thalabard<sup>4</sup> MD PhD, Elisabeth Fery-Lemonnier<sup>5</sup> MD, Gilles Russ<sup>6</sup> MD, Laurence Leenhardt<sup>6</sup> MD PhD,  
11  
12 Claude Bigorgne<sup>7</sup> MD, Philippe Tuppin<sup>2</sup> MD PhD, Bertrand Millat<sup>8</sup> MD, Anne Fagot-Campagna<sup>2</sup> MD  
13  
14 PhD.  
15  
16  
17  
18  
19

20 **AFFILIATIONS**

21 1 Hospital of Limoges, 2 Avenue Martin Luther King, 87000 Limoges, France

22  
23 2 Caisse Nationale d'Assurance Maladie des Travailleurs Salariés, 50 avenue du Professeur André  
24 Lemierre, 75986 Paris, France  
25

26 3 Pitié-Salpêtrière hospital, Department of general, visceral and endocrine surgery, 47/83 Boulevard  
27 de l'Hôpital, 75013 Paris, France  
28

29 4 Cochin hospital, Unit of Gynecology and endocrinology, 53 Avenue de l'Observatoire, 75014 Paris,  
30 France  
31

32 5. Ministry of Health, 14 avenue Duquesne, 75007 Paris  
33

34 6 Pitié Salpêtrière hospital, University Paris VI, Institut E3M, Department of thyroid diseases and  
35 endocrine tumors, 83 Boulevard de l'Hôpital, 75013 Paris, France  
36

37 7 La Pitié Salpêtrière Hospital, Department of Pathology, 83 bd de l'Hôpital, 75651 Paris, France  
38

39 8 Lapeyronie Hospital, 371 Av. du Doyen Gaston Giraud, 34295 Montpellier Cedex 5 34295  
40 Montpellier cedex 5  
41

42  
43 **CORRESPONDING AUTHOR:** Anne Fagot-Campagna at [anne.fagot@cnamts.fr](mailto:anne.fagot@cnamts.fr)  
44  
45

46 Caisse Nationale d'Assurance Maladie des Travailleurs Salariés, 50 avenue du Professeur André  
47  
48 Lemierre, 75986 Paris, France, Tel 33 1 72 60 20 59  
49

50  
51 **KEY-WORDS:** thyroid; surgery; cancer; Sniiram; overdiagnosis  
52

53 5519 words (text)  
54  
55  
56  
57  
58  
59  
60



**ABSTRACT**

**Context.** The rate of thyroid cancer is increasing in France, as well as concerns about overdiagnosis and treatment.

**Objectives.** To examine the care pathway of patients who undergo thyroid surgery in France and detect potential pitfalls.

**Design.** A large observational study based on medical reimbursements, 2009-2011.

**Setting.** Data from the Sniiram (National Health Insurance Information System).

**Patients.** Patients with thyroid surgery in 2010, classified into four groups: thyroid cancer, benign nodule, goitre or multiple nodules, other (hyperthyroidism, head-neck cancer).

**Main Outcome Measures.** Medical investigations during, prior and after thyroidectomy.

**Results.** A total of 35,367 patients underwent surgery (mean age 51 years, 80% females): 17% had a reported diagnosis of thyroid cancer, 20% benign nodule, 38% goitre or multiple nodules and 25% another diagnosis. The ratio of thyroidectomies with cancer over thyroidectomies with benign nodule was 0.8 and varied across regions. In the year preceding surgery, 82% of patients had an investigation by thyroid ultrasonography, 21% thyroid scintigraphy, 34% fine-needle aspiration cytology, 40% serum calcitonin assay and 54% serum calcium assay. In the following year, all patients with total thyroidectomy and 44% of patients with partial thyroidectomy and a diagnosis of benign nodule were taking thyroid hormone therapy. One hundred patients had been reoperated for a compressive haematoma and 63 died during the first month, half of whom had been operated for cancer. Mean rates of recurrent laryngeal nerve injury and hypocalcaemia (requiring blood tests plus treatments within 4-12 months) were estimated at 1.5% and 3.4%, respectively and were higher in the cancer group (2.3% and 5.7%).

**Conclusion.** This almost nation-wide study demonstrates the suboptimal management of patients prior to thyroidectomy in France. It suggests overdiagnosis and potential harms to patients, and calls for a review of the relevance of thyroidectomy, particularly with regards to microcancers.

## STRENGTHS AND LIMITATIONS OF THIS STUDY

- The Sniiram database includes almost all the insured population in France where medical insurance is mandatory. It is one of the largest administrative databases. It has led to many publications to monitor quality of care, describe health care pathways at a national level and guide public health policies. In this paper, data from 77% of the French population were extracted to study the health care pathway of a cohort of 35,000 people who underwent thyroidectomy in 2010 and provide a national picture.
- This observational study relies on the quality of the surgical procedure coding performed in public or private hospitals, as these procedure codes are necessary in order to classify the 4 groups: cancer, benign nodule, multiple nodules or goitre, other cases. Misclassifications may have occurred, which are more likely to happen in the case of microcancers considered as benign nodules in our study.
- While the Sniiram database records the follow-up and reimbursements of all patients, we still may have missed some non-surgical investigations performed prior to surgery. We used a reasonable one-year interval to define this period but procedures performed during a public hospital stay are not systematically coded within the hospital when they do not provide higher funding to the hospital. However, procedures such as thyroid ultrasonography, scintigraphy, fine-needle aspiration cytology, serum calcitonin and calcium assays are rarely performed during a hospital stay.
- As the Sniiram does not provide outpatient diagnoses, we constructed several algorithms to define potential complications that did not require systematic hospitalisation, such as hypoparathyroidism (defined with more than 3 serum calcium assays and 3 deliveries of calcium supplements during the 4th to 12th months after thyroidectomy) or recurrent laryngeal nerve injury (several definition based on speech therapy sessions, ENT visits or functional testing during the first 12 postoperative months).

## INTRODUCTION

The prevalence of all forms of thyroid disease is difficult to assess. Published clinical trials are often old and the performances of detection have substantially improved over time,<sup>i</sup>[1] consequently modifying patient management. In countries with sufficient dietary iodine intake, such as France or the USA, the clinical prevalence of thyroid nodules is about 5% and is higher in women (5.3 to 6.4% vs 0.8 to 1.6% for men) and persons over the age of 50 years in whom the prevalence is about 30 to 40%,<sup>ii</sup>[2]. The prevalence of thyroid disease based on ultrasonography screening is much higher and is currently estimated to be 67%<sup>iii</sup>[1,3], comparable to the rate of nodules discovered at autopsy,[1,3,4].

The growing prevalence of thyroid cancer has been clearly established. Over the last three decades, the number of new cases diagnosed in France has increased fivefold in both sexes,[5,6]. This increased prevalence almost exclusively concerns papillary cancers, with no impact on mortality, which has decreased over the same period. Over a period of 20 years, the proportion of microcancers (<10 mm) has increased from 4% to more than 50%. One-half of these microcancers are smaller than 3 mm and are discovered incidentally on thyroidectomy specimens. This increased prevalence of microcancers is directly related to progress in the detection of nodules by increasingly efficient ultrasound machines and progress in the histological diagnosis of cancer as a result of very thin histological sections and the use of immunohistochemistry. In fact, the majority of these microcancers appear to undergo growth arrest, while progression to symptomatic cancer is observed in only 1 out of every 15 nodules. The increased incidence of thyroid cancer is thus due to microcancers and can be considered to constitute a form of overdiagnosis[7]. The diagnosis of thyroid cancer, regardless of stage, results in an alteration of the patient's quality of life and social representation and can be responsible for sometimes unjustified modifications of therapeutic management or potentially morbid treatment follow-up, resulting in increased costs induced by incidentally discovered cancers.

1  
2  
3 Over the last 10 years, several medical authorities have published guidelines for the management of  
4 thyroid nodules and/or thyroid cancers: the European Thyroid Association (ETA) and the American  
5 Association of Clinical Endocrinologists (AACE) in 2006, the British Thyroid Association (BTA) in 2007,  
6  
7 the National Cancer Institute (NCI) in 2008, the American Thyroid Association (ATA) in 2009 and  
8  
9 2015, and the *Société Française d'Endocrinologie* (SFE) in 2011. Despite several differences, all  
10  
11 medical societies recommend TSH assay and thyroid ultrasound in all patients with thyroid disease  
12  
13 combined with fine-needle aspiration cytology of nodules with features suggestive of malignancy  
14  
15 [8,9,10]. According to the *Société Française d'Endocrinologie*, the majority of thyroid incidentalomas  
16  
17 require simple surveillance. The indications for thyroid surgery are rare, limited to nodules  
18  
19 demonstrated to be malignant on preoperative investigations, and very large or retrosternal nodules  
20  
21 (10), symptomatic or unsightly goitre or goitre accompanied by low TSH. Despite existing  
22  
23 international and national recommendations, much concern is being currently raised about  
24  
25 overdiagnosis and an excess of thyroidectomy, which may result in harms to the patients,[7].  
26  
27  
28  
29

30  
31 The objective of this observational study was to analyse the care pathway of patients prior to  
32  
33 thyroidectomy in France during the year 2010 and to study the impact of surgery on postoperative  
34  
35 morbidity and mortality in the Sniiram (French National Health Insurance Information System)  
36  
37 database, a largely published and nationwide comprehensive administrative database of about 56  
38  
39 million people based on medical reimbursement data (11).  
40  
41  
42  
43  
44  
45

## 46 **METHOD**

### 47 **Information system and population**

48  
49 In France, the Sniiram is an anonymous, individual database concerning all the beneficiaries of the  
50  
51 various national health insurance schemes (11,12,13). Medical insurance is mandatory and is  
52  
53 provided by the State for low income people. Many published studies have been based on the  
54  
55  
56  
57  
58  
59  
60

1  
2  
3 Sniiram which stands among the largest medico-administrative databases worldwide and is largely  
4  
5 used to guide public health policies in France as these data allow the systematic follow-up of all  
6  
7 medical care received by the population (12-13). It exhaustively records all reimbursed prescriptions  
8  
9 and outpatient services and procedures, as well as their date, over the previous three years plus the  
10  
11 current year. Identification of medicinal products is based on the ATC code (Anatomical Therapeutic  
12  
13 Classification), that of laboratory examinations is based on the national laboratory test coding table  
14  
15 and that of procedures is based on the *Classification Commune des Actes Médicaux* (CCAM)  
16  
17 [common classification of medical procedures]. The Sniiram does not contain any clinical data  
18  
19 concerning the results related to prescriptions or examinations, but it nevertheless includes  
20  
21 information on the possible presence of long-term diseases (LTD), such as cancers, eligible for 100%  
22  
23 reimbursement of healthcare expenditure following approval by a national health insurance  
24  
25 physician. These LTD are coded according to the international classification of diseases (ICD 10). A  
26  
27 unique and anonymous identification number for each person also allows integration into the  
28  
29 Sniiram database of the hospital discharge database (PMSI, *Programme de médicalisation des*  
30  
31 *systèmes d'information*). The principal diagnoses and associated diagnoses recorded in the PMSI are  
32  
33 coded according to the ICD 10 and the procedures performed, such as thyroidectomies, are coded  
34  
35 according to the CCAM.  
36  
37  
38  
39

40  
41 In 2010, the national health insurance general scheme (excluding local mutualist sections that  
42  
43 provide medical insurance for e.g., students, teachers) covered about 77% of the 65 million  
44  
45 inhabitants in France including low-income people and was the only scheme for which both vital  
46  
47 status and LTD were comprehensively recorded at that time. Data for the health insurance general  
48  
49 scheme beneficiaries who underwent thyroid surgery in 2010 were extracted from the Sniiram  
50  
51 database. The diagnoses recorded during the hospital stay, and the clinical examinations and  
52  
53 complementary investigations performed one year before and one year after surgery, estimated by  
54  
55 reimbursement data, were analysed. In order to establish an estimate for France as a whole, the  
56  
57  
58  
59  
60

1  
2  
3 sample sizes of general scheme beneficiaries undergoing thyroid surgery were extrapolated (by age-  
4  
5 group and gender) to the national estimates provided by Insee (*Institut national de la statistique et*  
6  
7 *des études économiques*) for the total population of France in January 2011. For the purposes of  
8  
9 regional comparisons, regional rates of the general scheme were standardized for the age and  
10  
11 gender structure of the Insee total population of France in January 2011.  
12

13  
14 Patients who had undergone thyroidectomy were classified into four exclusive groups according to  
15  
16 the type of thyroid disease. The first group was composed of patients who had a diagnosis of thyroid  
17  
18 cancer recorded in the databases. This group included patients with ICD 10 codes for malignant  
19  
20 neoplasm of thyroid gland (C73, D09.3), neoplasm of uncertain behaviour of thyroid gland (D44.0),  
21  
22 hypersecretion of calcitonin (E07.0) or multiple endocrine adenomatosis (D44.8) coded during the  
23  
24 hospital stay for thyroidectomy or in the LTD coding, and patients who underwent lymph node  
25  
26 dissection or radioiodine therapy without a diagnosis of hyperthyroidism.  
27  
28

29  
30 The second group was composed of patients who had a recorded diagnosis of benign nodule  
31  
32 according to ICD 10 codes for nontoxic single thyroid nodule (E04.1), benign nodule of the thyroid  
33  
34 gland (D34) or benign tumour of other and unspecified endocrine glands (D35.7, D35.8; D35.9)  
35  
36 during the hospital stay.  
37  
38

39  
40 The third group was composed of patients who had a recorded diagnosis of goitre or multiple  
41  
42 nodules on the basis of ICD 10 codes for nontoxic diffuse goitre (E04.0), nontoxic multinodular goitre  
43  
44 (E04.2), other specified nontoxic goitre (E04.8), nontoxic goitre, unspecified (E04.9), congenital  
45  
46 hypothyroidism with diffuse goitre (E03.0), dysmorphogenetic goitre (E07.1), or iodine-deficiency-  
47  
48 related goitre (E01.0, E01.1, E01.2).  
49

50  
51 Finally, the fourth group comprised patients who had another recorded diagnosis, especially head  
52  
53 and neck cancer and hyperthyroidism. These patients were excluded from the subsequent analysis,  
54  
55 as thyroidectomy was simply an associated procedure or was performed for hyperthyroidism.  
56  
57

### Definitions and statistical analysis

The care pathway was analysed in rolling years, 12 months before and 12 months after the date of thyroidectomy. A thyroidectomy frequency ratio was calculated between group 1 (cancer) and group 2 (benign nodule), overall and by region. In order to study regional variability, data were standardised for the age and gender of the population of beneficiaries at December 31, 2010. We compared the lowest to the highest value of 25 French regions using chi-square tests. The 26<sup>th</sup> region (Guyana) was excluded due to a small number of cases (7 cases of cancer and 19 benign nodule) and different care pathways occurring in this rural region. Drug treatments were identified by the presence of at least three reimbursements over the 12-month period before and then the 12-month period after hospitalisation. Thyroid ultrasonography, fine-needle aspiration cytology and scintigraphy were identified by the presence of specific codes, whether they were performed in a hospital outpatient department or in private practice. However, the procedures performed during a public hospital stay were not systematically coded at that time, possibly resulting in missing data. Similarly, laboratory tests performed during a public hospital stay were not identified, as they are not reimbursed individually. Reimbursements for hospital outpatient and private practice endocrinology and visits to an ear-nose-throat (ENT) specialist were taken into account. There again, ambulatory visits to a public hospital specialist were not systematically coded at that time, possibly resulting in missing data. Postoperative sick leave allowances were also taken into account.

Complications were identified during the thyroidectomy hospital stay and over the following year from hospitalisation and/or ambulatory reimbursement data. Severe complications were defined by the development of compressive haematoma during the thyroidectomy hospital stay, death (in-hospital or during the first month), or the presence of a CCAM procedure supposedly related to thyroidectomy (tracheobronchial stent, tracheotomy, arytenoidectomy, etc.). Readmissions for thyroid problems or for phosphorus-calcium imbalance were also identified. Various indicators that could also constitute markers of late ENT complications were constructed: at least 2 visits to an ENT

1  
2  
3 specialist, at least 1 visit to a speech therapist, laryngeal function tests looking for recurrent laryngeal  
4  
5 nerve injury, laryngoscopy, etc, over the 12-month period. Hypoparathyroidism was suspected by the  
6  
7 presence of at least 3 serum calcium assays and at least 3 deliveries of calcium supplements over the  
8  
9 period ranging from 4 to 12 months after surgery (to avoid selecting very transient  
10  
11 hypoparathyroidism), or the presence of hospitalisation with a diagnosis of hypoparathyroidism over  
12  
13 the 12-month period.  
14

15  
16  
17 Finally, the numbers of patients who had undergone thyroidectomy and those with LTD for thyroid  
18  
19 cancer from 2010 to 2013 were analysed in order to estimate temporal trends.  
20

21  
22 Statistical analyses were performed with SAS software (SAS Enterprise Guide, version 4.3, SAS  
23  
24 Institute Inc, Cary, NC, USA). Analyses of the SNIIRAM database have been approved by the French  
25  
26 personal data protection agency (*Commission Nationale Informatique et Libertés*). Because the  
27  
28 SNIIRAM database is anonymous, no other ethical approval was required for this study.  
29  
30  
31  
32  
33  
34  
35  
36  
37  
38  
39  
40  
41  
42  
43  
44  
45  
46  
47  
48  
49  
50  
51  
52  
53  
54  
55  
56  
57  
58  
59  
60



## RESULTS

Among 50 million people insured by the health insurance general scheme (77% of the French population), 35,367 underwent thyroid surgery in 2010, i.e. by extrapolation based on the age and gender structure of the French population, about 45,800 people in the overall French population. Patient characteristics and characteristics of the surgical procedures performed are reported in Table 1.

**Table 1 - Characteristics of the 35,367 health insurance general scheme beneficiaries who underwent thyroidectomy in 2010, by the type of thyroid diagnosis, Sniiram, France.**

|                                                                  | Cancer<br>N=5,979<br>(17%) | Benign nodule<br>N=7,270<br>(20%) | Multiple nodules<br>and goitre<br>N=13,350<br>(38%) | Others<br>N=8,768<br>(25%) |
|------------------------------------------------------------------|----------------------------|-----------------------------------|-----------------------------------------------------|----------------------------|
| Age < 20 years                                                   | 1.4%                       | 1.6%                              | 0.4%                                                | 1.0%                       |
| Age < 50 years                                                   | 47%                        | 53%                               | 40%                                                 | 44%                        |
| Women                                                            | 76%                        | 79%                               | 83%                                                 | 79%                        |
| Thyroidectomy                                                    |                            |                                   |                                                     |                            |
| - total or subtotal                                              | 77%                        | 26%                               | 85%                                                 | 79%                        |
| - partial                                                        | 11%                        | 71%                               | 12%                                                 | 18%                        |
| - completion                                                     | 12%                        | 3%                                | 3%                                                  | 3%                         |
| Surgery performed in a public hospital                           | 54%                        | 38%                               | 46%                                                 | 54%                        |
| Surgery practiced in a public or private hospital that performed |                            |                                   |                                                     |                            |
| < 30 thyroid surgeries / year                                    | 16%                        | 24%                               | 17%                                                 | 15%                        |
| > 100 thyroid surgeries / year                                   | 51%                        | 37%                               | 41%                                                 | 55%                        |

Patients with a diagnosis of multiple nodules or goitre represented the largest subgroup (38% of patients), followed by those with a benign nodule (20%) and those with thyroid cancer, regardless of

1  
2  
3 the stage (17%). One quarter of patients had another type of diagnosis, mainly head and neck cancer  
4  
5 or hyperthyroidism. Each of these subgroups comprised 80% women with a mean age of 51 years.  
6  
7 Total thyroidectomy (or completion thyroidectomy) was performed for about 89% of patients with a  
8  
9 postoperative diagnosis of thyroid cancer and 86% of cases of multiple nodules or goitres, while  
10  
11 partial thyroidectomy was performed in 71% of patients with benign nodules. Patients were more  
12  
13 frequently operated in private or public hospitals with high thyroid surgery rates, especially when  
14  
15 they had a diagnosis of thyroid cancer or multiple nodules or goitres.  
16  
17

18  
19 The rate of thyroidectomy with a diagnosis reported as thyroid cancer, nodule or goitre in 2010  
20  
21 (excluding thyroidectomies for head and neck cancer or hyperthyroidism) was 5.3 per 10,000  
22  
23 inhabitants and the standardised rates varied according to regions between 4.0 and 8.1 per 10,000  
24  
25 inhabitants ( $p=0.003$ ) as shown in figure 1.  
26  
27

28  
29 In patients 20 years and older, the ratio of the number of thyroidectomies with a diagnosis of cancer  
30  
31 over the number of thyroidectomies with a diagnosis of benign nodule was 0.8. This ratio varied  
32  
33 between regions from 0.5 in Basse-Normandie, Bretagne, Limousin and Languedoc-Roussillon to 2.6  
34  
35 in Nord-Pas-de-Calais, as shown in figure 2. The percentage of thyroidectomies with a diagnosis of  
36  
37 cancer over the total number of thyroidectomies with a diagnosis of cancer or benign nodule varied  
38  
39 significantly from 28% to 69% ( $p=0.001$ ).  
40  
41

42 During the year preceding thyroid surgery, the health care varied according to the group. Eighty  
43  
44 percent of patients of group 1 ( $n=5,979$ ) who finally had a diagnosis of thyroid cancer had evidence  
45  
46 of investigation by thyroid ultrasonography and 44% by fine-needle aspiration cytology (Table 2)  
47  
48 prior to surgery. In group 2 ( $n=7,270$ ), corresponding to patients who had a recorded diagnosis of  
49  
50 benign nodule, the fine-needle aspiration cytology rate was 34%.  
51  
52  
53  
54  
55  
56  
57  
58  
59  
60

Among people with thyroidectomy and a diagnosis of cancer or benign nodule, the overall fine-needle aspiration cytology rate was 39% and the standardised rates varied according to regions between 11% (Franche-Comté) and 53% (Ile de France) ( $p=0.001$ , figure 3).

**Table 2 - Pre-thyroidectomy care pathway (previous 12 months prior surgery in 2010), by the type of thyroid diagnosis, Sniiram, France.**

|                                                | Cancer<br>N=5,979 | Benign<br>nodule<br>N=7,270 | Multiple<br>nodules<br>and goitre<br>N=13,350 | Cancer /<br>Benign<br>nodule ratio | Cancer /<br>Goitre ratio |
|------------------------------------------------|-------------------|-----------------------------|-----------------------------------------------|------------------------------------|--------------------------|
| Thyroid ultrasound                             | 80%               | 84%                         | 82%                                           | 1.0                                | 1.0                      |
| Fine-needle aspiration cytology of the thyroid | 44%               | 34%                         | 23%                                           | 1.3                                | 1.9                      |
| Thyroid scintigraphy                           | 18%               | 21%                         | 22%                                           | 0.9                                | 0.8                      |
| <i>At least one of the 3</i>                   | <i>89%</i>        | <i>91%</i>                  | <i>88%</i>                                    | <i>1.0</i>                         | <i>1.0</i>               |
| TSH assay                                      | 89%               | 91%                         | 92%                                           | 1.0                                | 1.0                      |
| T3 assay                                       | 36%               | 35%                         | 37%                                           | 1.0                                | 1.0                      |
| T4 assay                                       | 63%               | 65%                         | 66%                                           | 1.0                                | 1.0                      |
| Calcitonin assay                               | 44%               | 39%                         | 39%                                           | 1.1                                | 1.1                      |
| Calcium assay                                  | 58%               | 50%                         | 55%                                           | 1.2                                | 1.1                      |
| <i>No T3, T4 or TSH assay</i>                  | <i>10%</i>        | <i>8%</i>                   | <i>8%</i>                                     | <i>1.2</i>                         | <i>1.3</i>               |
| ≥ 3 thyroid hormone deliveries                 | 21%               | 16%                         | 19%                                           | 1.3                                | 1.1                      |
| ≥ 1 endocrinology consultation                 | 49%               | 44%                         | 49%                                           | 1.1                                | 1.0                      |
| ≥ 1 ear-nose-throat specialist consultation    | 43%               | 49%                         | 43%                                           | 0.9                                | 1.0                      |

In the 3 groups of patients, TSH assays had been performed in about 90% of patients, T4 assay in more than 63% , T3 assay in more than 35% and a thyroid scintigraphy in more than 18%, prior to surgery. Serum calcitonin assay had been performed in 44% of patients and serum calcium assay in 58% of patients who finally had a diagnosis of thyroid cancer. These proportions were 39% and 50%, respectively, for patients with a diagnosis of benign nodule. Less than one-half of patients, regardless of their thyroid disease, were referred to an endocrinologist. Finally, neither thyroid ultrasonography nor fine-needle aspiration cytology was performed in 10% of patients, neither T3, T4 nor TSH assay was performed in about 9% of patients in groups 1 and 2.

1  
2  
3 The fine-needle aspiration cytology rate varied according to the region and was probably related to  
4 the availability of doctors able to perform this technique and cytopathologists. Among the patients  
5 who had undergone surgery and had a diagnosis of thyroid cancer or benign nodule, the fine-needle  
6 aspiration cytology rate was 53% in patients from Ile-de-France and Rhône-Alpes, but only 10% in  
7 those from Franche-Comté (and 0% in Guyana for only 28 operated patients).  
8  
9

10  
11  
12 During the 12 months following surgery, TSH assay was performed in almost all patients (Table 3). T3  
13 assay was performed in 51% of patients with thyroid cancer, while the rate of total thyroidectomy in  
14 this group was 76%. T3 assay was also performed in 26% of patients with a diagnosis of benign  
15 nodule, but the rate of partial thyroidectomy in this group was 71%. Thyroid hormone replacement  
16 therapy was administered to all patients who had undergone total thyroidectomy and in 44% of  
17 patients who had undergone partial thyroidectomy and had a diagnosis of benign nodule. The  
18 endocrinologist referral rate remained low: 56% of patients with thyroid cancer and 34% of patients  
19 with benign nodule consulted an endocrinologist. The mean duration of sick leave for employed  
20 patients was 89 days for patients with thyroid cancer and 38 days for patients with benign nodules.  
21 Sick leave lasted more than 3 weeks in 60 to 81% of cases, depending on the group.  
22  
23  
24  
25  
26  
27  
28  
29  
30  
31  
32  
33  
34  
35  
36  
37  
38  
39  
40  
41  
42  
43  
44  
45  
46  
47  
48  
49  
50  
51  
52  
53  
54  
55  
56  
57  
58  
59  
60

**Table 3 - Post-thyroidectomy care pathway (following 12 months after surgery in 2010), by the type of thyroid diagnosis, Sniiram, France.**

|                                                  | Cancer<br>N=5,979 | Benign<br>nodule<br>N=7,270 | Multiple<br>nodules<br>and goitre<br>N=13,350 | Cancer /<br>Benign<br>nodule ratio | Cancer /<br>Goitre ratio |
|--------------------------------------------------|-------------------|-----------------------------|-----------------------------------------------|------------------------------------|--------------------------|
| TSH assay                                        | 96%               | 93%                         | 97%                                           | 1.0                                | 1.0                      |
| T3 assay                                         | 51%               | 26%                         | 28%                                           | 2.0                                | 1.9                      |
| T4 assay                                         | 76%               | 63%                         | 68%                                           | 1.2                                | 1.1                      |
| Levothyroxine replacement therapy                | 95%               | 58%                         | 92%                                           | 1.6                                | 1.0                      |
| In those with total thyroidectomy                | 99%               | 97%                         | 99%                                           | 1.0                                | 1.0                      |
| In those with partial thyroidectomy              | 73%               | 44%                         | 48%                                           | 1.7                                | 1.5                      |
| ≥ 1 endocrinology consultation                   | 56%               | 34%                         | 39%                                           | 1.7                                | 1.4                      |
| ≥ 1 ear-nose-throat specialist consultation      | 33%               | 36%                         | 32%                                           | 0.9                                | 1.0                      |
| In patients with at least one day of sick leave: |                   |                             |                                               |                                    |                          |
| mean number of days/patient                      | 89 days           | 38 days                     | 45 days                                       | 2.3                                | 2.0                      |
| % of patients, with                              |                   |                             |                                               |                                    |                          |
| > 10 days of sick leave                          | 96%               | 94%                         | 97%                                           | 1.0                                | 1.0                      |
| >14 days of sick leave                           | 93%               | 85%                         | 93%                                           | 1.1                                | 1.0                      |
| >21 days of sick leave                           | 81%               | 60%                         | 75%                                           | 1.4                                | 1.1                      |

Severe complications of thyroid surgery were rare (Table 4). About twenty patients, 14 in the cancer group and less than 10 in the multiple nodules and goitre group (none in the benign nodule group), died in hospital; another 11 patients died during the first 30 days after surgery, i.e. an overall short-term mortality of about 30 patients. The cause of death is not indicated in these administrative databases. One hundred patients, 25 in the cancer group and 75 all together in the benign nodule group and the goitre group, experienced postoperative compressive haematoma requiring reoperation. This compressive haematoma rate (0.4%) did not appear to be related to the underlying thyroid disease or to the type of surgical procedure performed, such as radical thyroidectomy or lymph node dissection.

**Table 4 – Immediate and late complications of thyroidectomy performed in 2010, by the type of thyroid diagnosis, Sniiram, France.**

|                                                                                       | Cancer<br>N=5,979 | Benign<br>nodule<br>N=7,270 | Multiple<br>nodules<br>and goitre<br>N=13,350 | Cancer /<br>Benign<br>nodule ratio | Cancer /<br>Goitre ratio |
|---------------------------------------------------------------------------------------|-------------------|-----------------------------|-----------------------------------------------|------------------------------------|--------------------------|
| <b>Immediate complications</b>                                                        |                   |                             |                                               |                                    |                          |
| <b>During the hospitalisation:</b>                                                    |                   |                             |                                               |                                    |                          |
| Mean length of stay > 3 days                                                          | 42%               | 29%                         | 39%                                           | 1.4                                | 1.1                      |
| Compressive haematoma                                                                 | 0.4% (n=25)       | 0.3% (n=23)                 | 0.4% (n=52)                                   | 1.3                                | 1.0                      |
| Mortality                                                                             | 0.2% (n=14)       | 0.0% (n=0)                  | 0.0% (n<10)                                   | -                                  | -                        |
| One-month mortality                                                                   | 0.3% (n=19)       | 0.0% (n<10)                 | 0.1% (n=10)                                   | -                                  | -                        |
| <b>Late complications</b>                                                             |                   |                             |                                               |                                    |                          |
| <b>Severe complications*</b>                                                          | 1.4% (n=84)       | 0.4% (n=32)                 | 0.6% (n=86)                                   | 3.5                                | 2.3                      |
| <b>Other complications during the first year</b>                                      |                   |                             |                                               |                                    |                          |
| - At least 2 ear-nose-throat specialist consultations                                 | 15%               | 13%                         | 11%                                           | 1.2                                | 1.3                      |
| - At least 1 speech therapy session                                                   | 8.8%              | 4.1%                        | 6.5%                                          | 2.1                                | 1.4                      |
| - Testing for recurrent laryngeal nerve injury**                                      | 2.3% (n=137)      | 1.2% (n=90)                 | 1.2% (n=164)                                  | 1.9                                | 1.9                      |
| <i>At least 1 of these complications</i>                                              | 23%               | 17%                         | 17%                                           | 1.3                                | 1.3                      |
| <b>Hypoparathyroidism complications</b>                                               |                   |                             |                                               |                                    |                          |
| - At least 3 serum calcium assays and at least 3 deliveries of calcium supplements*** | 5.7%              | 1.0%                        | 3.5%                                          | 5.7                                | 1.6                      |
| - Readmission for hypoparathyroidism                                                  | 0.2% (n=11)       | 0% (n=0)                    | 0% (n=0)                                      | -                                  | -                        |
| <i>At least 1 hypoparathyroidism complication</i>                                     | 5.8%              | 1.0%                        | 3.5%                                          | 5.8                                | 1.7                      |
| <i>At least 1 complication or hypoparathyroidism</i>                                  | 27%               | 18%                         | 20%                                           | 1.5                                | 1.3                      |
| <b>Other readmissions for</b>                                                         |                   |                             |                                               |                                    |                          |
| - Thyroid disorders                                                                   | 6.4%              | 1.4%                        | 2.2%                                          | 4.6                                | 2.9                      |
| - Hypercalcaemia                                                                      | 1.2% (n=71)       | 0.1% (n<10)                 | 0.1% (n=18)                                   | -                                  | -                        |

\* Tracheobronchial stent, tracheotomy, arytenoidectomy, etc.

\*\* Laryngeal function tests, indirect laryngoscopy, etc.

\*\*\* during the 4th to 12th months after thyroidectomy.

The late complication rate was estimated by the number of specialist visits or procedures, or the readmission rate during the year following surgery. Patients with more than 2 ENT or speech therapy visits and patients in whom a laryngeal procedure was performed were considered to have experienced a laryngeal complication. The late complication rate varied according to the group from 17% to 23%, and the recurrent laryngeal nerve injury rate varied from 2.3% to 1.2%. Patients in whom more than 3 serum calcium assays were performed and to whom calcium supplements were dispensed more than three times during the 4<sup>th</sup> to the 12<sup>th</sup> month following surgery were considered to suffer from persistent hypoparathyroidism. This hypoparathyroidism rate ranged from 5.7% for the thyroid cancer group to 1% for the nodule group. Among people with a diagnosis of benign

1  
2  
3 nodule, a marker of hypoparathyroidism was recorded in 10 persons (0.2%) who underwent partial  
4  
5 thyroidectomy and 63 (3%) of those with total or subtotal thyroidectomy. The readmission rate in  
6  
7 the thyroid cancer group was higher for hypercalcaemia than for hypocalcaemia: 1.2% and 0.2%,  
8  
9 respectively.

10  
11  
12 Between 2010 and 2012, the number of patients who had undergone thyroidectomy increased by  
13  
14 400 patients each year, from about 35,400 in 2010 to 36,200 in 2012, i.e. a mean annual growth rate  
15  
16 of +1.1%. This trend was reversed between 2012 and 2013, as the number of patients decreased by  
17  
18 900 patients to 35,300, i.e. a growth rate of -2.6%. The number of patients with LTD 100% health  
19  
20 insurance cover for thyroid cancer increased from 63,311 in 2011, to 65,401 in 2012 and 67,461 in  
21  
22 2013, i.e. a mean annual growth rate of +3.2%. In parallel, between 2010 and 2013 among all general  
23  
24 scheme beneficiaries, the number of thyroid ultrasonography examinations performed increased  
25  
26 from 1.12 million to 1.19 million (+2.2%/year) and the number of thyroid fine-needle aspiration  
27  
28 cytology procedures increased from 89,000 to 98,000 (+3.4%/year), while the number of thyroid  
29  
30 scintigraphies decreased from 66,000 to 58,500 (-3.8%/year). The number of TSH assays (alone or  
31  
32 combined with other parameters) increased from 12.2 million to 14.8 million (+7%/year), while the  
33  
34 number of free T4 assays (alone or combined with other parameters) increased from 3.0 million to  
35  
36 3.6 million (+7%/year), and the number of free T3 assays (alone or combined with other parameters)  
37  
38 also increased from 1.0 million to 1.3 million (+10%/year).  
39  
40  
41  
42  
43  
44  
45  
46  
47  
48  
49  
50  
51  
52  
53  
54  
55  
56  
57  
58  
59  
60

## DISCUSSION

This observational and almost nation-wide study based on more than 35,000 patients first demonstrates the suboptimal management of patients prior to thyroidectomy in France. The thyroidectomy rate with a diagnosis of benign nodule appears to be excessively high compared to the thyroidectomy rate with a diagnosis of thyroid cancer. Furthermore, these rates vary considerably from one region to another, documenting variations in clinical practices across the country. Fine-needle aspiration cytology before surgery for a suspicious thyroid nodule is performed in less than one-half of cases, while this procedure could avoid surgery for a certain number of patients, which, as shown by this study as well as other studies, is not devoid of complications. Secondly, some examinations are performed too frequently, such as preoperative thyroid scintigraphy and T4 assay, and preoperative and postoperative T3 assay. Therefore these data suggest that suboptimal management prior to thyroidectomy leads to overdiagnosis and potential harms to patients,[7] as well as a lack of efficiency for the medical insurance system.

The volume of data collected from a database covering 77% of the French population allows us to analyse the health care pathway and evaluate its health impact, as medical insurance is mandatory and the Sniiram database records the follow-up of all patients [11-13]. Although guidelines [8-10] do not specify a maximum interval between preoperative assessment and thyroid surgery, the one-year interval adopted for this study appears to be reasonable. Some non-surgical procedures considered to be necessary to the preoperative and postoperative care pathways may not have been identified from the Sniiram database when they were performed during a public hospital stay as they are not systematically coded within the hospital when they do not provide higher funding to the hospital. However, these non-surgical procedures to investigate thyroid disease are rarely performed during a hospital stay. More importantly, the quality of this study relies on the quality of the surgical procedure coding performed in public or private hospitals, as these procedure codes are necessary in order to classify the 4 groups of thyroidectomies: cancer, benign nodule, multiple nodules or goitre,



1  
2  
3 other cases. Other data were therefore investigated, such as requests for LTD coverage for thyroid  
4  
5 cancer, reimbursement for radioiodine therapy or lymph node dissection, to isolate cancer cases.  
6  
7 Nevertheless, it is still possible that the group described as surgery with a diagnosis of benign nodule  
8  
9 included few cases of thyroid cancer, which are more likely to be microcancers. Our dataset also does  
10  
11 not provide information on cancer size. However, the incidence of thyroid cancers and especially the  
12  
13 incidence of micro papillary carcinomas has been studied based on a French registry covering over  
14  
15 3000 cases of thyroid carcinomas and a population over 4,6 million inhabitants [14]. During the 1998-  
16  
17 2000 period, half of thyroid carcinomas diagnosed had a size lower than 10 mm and a third 5 mm or  
18  
19 less. Between the years 1983-1985 and 1998-2000, the number of tumors with a size lower than 10  
20  
21 mm increased 9-fold over the same period.  
22  
23

24  
25 Despite a number of differences, all guidelines [8-10] recommend a basic work-up in patients with  
26  
27 any form of thyroid disease, comprising TSH assay to detect thyroid dysfunction, specific thyroid  
28  
29 ultrasonography to map and characterise the nodule, followed, if necessary, by a fine-needle  
30  
31 aspiration cytology targeted to suspicious nodules, whenever they are sufficiently large to allow this  
32  
33 procedure. In France, the *Société française d'endocrinology* like other medical societies,[8-10]  
34  
35 published guidelines for the management of thyroid nodules to preoperatively determine the nature  
36  
37 of the nodules and their potential for progression starting at least in 2008. The French guidelines  
38  
39 were published in 2010, during the study period. Our analyses show that the thyroidectomy rate  
40  
41 started to decline between 2012 and 2013 (-900 thyroidectomies), although the number of patients  
42  
43 with 100% fee coverage for thyroid cancer as LTD continued to increase. There therefore appears to  
44  
45 be both an effect and latency in the diffusion of knowledge concerning the management of thyroid  
46  
47 nodules.  
48  
49

50  
51 TSH assay must be performed as first-line assessment of thyroid disease, as its sensitivity allows the  
52  
53 detection of all cases of thyroid dysfunction [10]. T4 assay should only be requested as second-line  
54  
55 test, together with T3 when TSH is low, and together with anti-TPO antibody assay when TSH is high  
56  
57  
58  
59  
60

1  
2  
3 [10]. However, in 2010, T4 assay was performed in almost two-thirds of patients and T3 assay in  
4 more than one-third of patients prior to thyroidectomy with thyroid cancer or benign nodule.  
5 Similarly, thyroid scintigraphy is no longer indicated in euthyroid patients [10], but it was performed  
6 prior to thyroidectomy in almost one in five patients who had thyroid cancer or benign nodule.  
7  
8  
9

10  
11  
12 On the other hand, thyroid ultrasonography is an essential part of the diagnostic work-up [8-10,15].  
13 It was frequently performed in our study, but only in 80% to 84% of cases rather than 100% of cases,  
14 as other diagnostic examinations may have been performed: neck vessel ultrasonography, neck CT  
15 scan or MRI, for example, which also suggests the possibility of incidentalomas, i.e. incidentally  
16 discovered nodules. The Tirads score, proposed in 2009 [16], can be used to evaluate the ultrasound  
17 risk of malignancy by taking 6 features into account. Based on a series of 4,550 operated nodules, the  
18 sensitivity of the Tirads score to detect malignant lesions varied from 87% to 95%, with a negative  
19 predictive value of 99%, and an excellent inter-observer reproducibility,[3,16]. Use of the Tirads score  
20 therefore allows fine-needle aspiration cytology to be reserved for nodules with an elevated Tirads  
21 score. It was however impossible in our data to determine the percentage of patients in whom this  
22 score may have limited the indications for fine-needle aspiration cytology.  
23  
24  
25  
26  
27  
28  
29  
30  
31  
32  
33  
34  
35

36  
37 Fine-needle aspiration cytology is recommended for all nodules associated with a high-risk context,  
38 all suspicious nodules or nodules larger than 2 cm, before deciding on the indication for surgery [10].  
39 However, fine-needle aspiration cytology was performed in less than one-half of patients operated  
40 with a diagnosis of thyroid cancer (44%) or benign nodule (34%).  
41  
42  
43  
44  
45

46  
47 The percentage of patients receiving postoperative levothyroxine replacement therapy appears to be  
48 consistent with the surgical procedure performed, as this rate was 99% among patients who had  
49 undergone total thyroidectomy. Levothyroxine therapy rates after partial thyroidectomy were 73% in  
50 the thyroid cancer group and 44% in the nodule group. The expected hypothyroidism rate after  
51 partial thyroidectomy has been estimateavd by others to be 11% [17], but this figure must be  
52  
53  
54  
55  
56  
57  
58  
59  
60

1  
2  
3 adjusted to the volume of thyroid parenchyma left, which is not available in our study. T4 assay was  
4  
5 performed at least once in more than two-thirds of patients. At least one T3 assay was performed in  
6  
7 more than one-fourth of patients after surgery. Although a proportion of patients require adjustment  
8  
9 of thyroid hormone replacement therapy, T3 assay appears to be inappropriate and generates a  
10  
11 considerable excess cost.  
12

13  
14 This excess cost must be added to sick leave allowances received by employed patients. Guidelines  
15  
16 for practitioners were introduced in France in 2010 to recommend sick leave of 10 to 15 days after  
17  
18 thyroidectomy. In our study, more than 85% of patients received sick leave allowances for more than  
19  
20 14 days and more than 60% received sick leave allowances for more than 21 days. However, the  
21  
22 specific reasons for extension of sick leave (i.e. difficulties adjusting replacement therapy,  
23  
24 complications of surgery or other causes) are not recorded in the Sniiram database.  
25  
26

27  
28 The postoperative or short-term mortality rates and the rate of compressive haematoma requiring  
29  
30 reoperation, 0.1% and 0.4%, respectively, are situated in the lower end of the ranges reported in the  
31  
32 literature. The postoperative bleeding rate reported in the literature ranges from 0 to 6.5% [18,19].  
33  
34 In 2014, Weiss et al. reported a compressive haematoma rate of 1.25% in a series of 150,012 patients  
35  
36 [20]. Compressive haematoma is associated with a 2.9-fold increased risk of mortality, as mortality  
37  
38 rates were 1.34% in the presence of haematoma vs 0.32% for the overall group. Some authors  
39  
40 consider that thyroid cancer is associated with an increased risk of haematoma,[21] but such an  
41  
42 association was not observed in our cohort. Compressive haematoma can be life-threatening and  
43  
44 requires emergency decompression. It can also occur beyond the 6th postoperative hour. The  
45  
46 *Association Francophone de Chirurgie Endocrinienne* (AFCE) has recently recommended that total  
47  
48 thyroidectomy should not be performed as an ambulatory procedure [22].  
49  
50

51  
52 Hypoparathyroidism and recurrent laryngeal nerve injuries were the most common complications of  
53  
54 thyroidectomy. In the present study, the estimated hypoparathyroidism rate between 4 months and  
55  
56

1  
2  
3 1 year after surgery was 6% in the thyroid cancer group and 1% in the benign nodule group, on the  
4 basis of more than 3 serum calcium assays and more than 3 deliveries of calcium supplements.  
5  
6 However, it increased up to 3% in the benign nodule group when total thyroidectomy was  
7 performed. The recurrent laryngeal nerve injury rate is more difficult to estimate: 9% and 4% of  
8 patients in the 2 groups attended speech therapy sessions, and 23% and 17% attended at least 2 ENT  
9 visits or speech therapy sessions or underwent functional testing for recurrent laryngeal nerve  
10 injuries during the first 12 postoperative months. The complication rate depends on the time since  
11 the operation, the mode of detection and the definition of postoperative complications. For  
12 example, Duclos et al., using a serum calcium cut-off of 2mmol/L, reported postoperative  
13 hypoparathyroidism and permanent hypoparathyroidism rates of 25.9% and 2.7%, respectively [23].  
14 The unilateral or bilateral recurrent laryngeal nerve injury rate varies according to the time since the  
15 operation, 2.3% after one year vs 9.8% immediately postoperatively, and the mode of detection, less  
16 than 2% without specific examination vs more than 6% when indirect laryngoscopy is performed [24].  
17  
18 Our estimations are based on an indirect approach, which can overestimate or underestimate the  
19 true complication rate.  
20  
21  
22  
23  
24  
25  
26  
27  
28  
29  
30  
31  
32  
33  
34  
35  
36  
37  
38

### 39 **Conclusion**

40  
41  
42 With more than 35,400 general scheme beneficiaries (or about 45,800 nation-wide) who underwent  
43 surgery in 2010, and 35,300 in 2013, thyroidectomy is one of the surgical procedures most commonly  
44 performed in France. The thyroidectomy rate with a diagnosis of benign nodule appears to be  
45 excessively high compared to the thyroidectomy rate with a diagnosis of thyroid cancer. Such  
46 assessment is likely to be shared by many European countries [7]. Partial compliance with guidelines  
47 prior to thyroidectomy, especially the low rate of fine-needle aspiration cytology, indicates the need  
48  
49  
50  
51  
52  
53  
54  
55  
56  
57  
58  
59  
60

1  
2  
3 for large-scale diffusion of current guidelines and clinical practice evaluation by all professionals  
4  
5 involved in the care pathway.  
6  
7

8  
9 Several actions have been initiated by the French national health insurance in 2015 to reduce  
10  
11 potential harms from overdiagnosis and overtreatment. Specific booklets have been developed for  
12  
13 general practitioners and patients [25]. Dedicated visits to general practitioners, specialists and  
14  
15 surgeons are performed. Public or private hospitals with a low ratio of thyroidectomies with a  
16  
17 diagnosis of cancer over thyroidectomies with a diagnosis of benign nodule are monitored.  
18  
19

20  
21 Active surveillance of microcarcinomas with a rigorous patient selection is also being discussed  
22  
23 among international experts [26]. It involves a psychological cost to the patient and a financial cost to  
24  
25 the society due to the annual follow-up (medical visit, thyroid and lymph node ultrasound) and  
26  
27 should be discussed with each patient. Some French experts recommend to practice fine needle  
28  
29 aspiration of a micronodule in case of suspicion of lymph node or extra-thyroid involvement, or of a  
30  
31 documented increasing size of the nodule, if the micronodule is based on the isthmas or at the highest  
32  
33 third part of the thyroid, or if the patient is aged less than 40 years. An international review of the  
34  
35 relevance of thyroidectomy and assessment of the long-term risk of microcancers is necessary in  
36  
37 view of changing international clinical practices [7,26].  
38  
39  
40  
41  
42  
43  
44  
45  
46  
47  
48  
49  
50  
51  
52  
53  
54  
55  
56  
57  
58  
59  
60

1  
2  
3 **Figure 1. Age and gender standardised rates of patients with thyroidectomy, by region, in 2010,**  
4 **Sniiram, France**

5  
6 **Figure 2. Ratios of the number of thyroidectomies with a diagnosis of cancer over the number of**  
7 **thyroidectomies with a diagnosis of benign nodule, by region, in 2010, Sniiram, France**

8  
9 **Figure 3. Fine-needle aspiration cytology standardised rates among people with thyroidectomy and**  
10 **a diagnosis of cancer or benign nodule, by region, in 2010, Sniiram, France**  
11  
12  
13  
14  
15  
16  
17  
18  
19  
20  
21  
22  
23  
24  
25  
26  
27  
28  
29  
30  
31  
32  
33  
34  
35  
36  
37  
38  
39  
40  
41  
42  
43  
44  
45  
46  
47  
48  
49  
50  
51  
52  
53  
54  
55  
56  
57  
58  
59  
60

For peer review only

**AUTHOR CONTRIBUTION**

**Study concept and design:** Muriel Mathonnet, Anne Cuerq, Christophe Tresallet, Jean-Claude Thalabard, Elisabeth Fery-Lemonnier, Philippe Tuppin, Bertrand Millat, Anne Fagot-Campagna

**Interpretation of data:** Muriel Mathonnet, Anne Cuerq, Christophe Tresallet, Jean-Claude Thalabard, Elisabeth Fery-Lemonnier, Gilles Russ, Laurence Leenhardt, Claude Bigorgne, Philippe Tuppin, Bertrand Millat, Anne Fagot-Campagna

**Drafting of the manuscript:** Muriel Mathonnet, Anne Cuerq, Anne Fagot-Campagna

**Critical revision of the manuscript for important intellectual content:** Muriel Mathonnet, Anne Cuerq, Christophe Tresallet, Jean-Claude Thalabard, Elisabeth Fery-Lemonnier, Gilles Russ, Laurence Leenhardt, Claude Bigorgne, Philippe Tuppin, Bertrand Millat, Anne Fagot-Campagna

**Statistical analysis:** Anne Cuerq

**Study supervision:** Muriel Mathonnet, Bertrand Millat, Anne Fagot-Campagna

All authors give final approval of the version to be published.

The authors have no competing interest.

No additional data are available due to a restrictive access provided by the Commission Nationale Informatique et Libertés (CNIL) to the SNIRAM database.

No specific funding was provided to this study apart from the time of the employees of the medical insurance system and of experts.

## References

- 1- Dean DS, Gharib H. Epidemiology of thyroid nodules. *Best Pract Res Clin Endocrinol Metab* 2008;22:901-11. PMID: 19041821
- 2- Mazzaferri EL. Management of a solitary thyroid nodule. *N Engl J Med* 1993;238:553-9. PMID: 8426623
- 3- Russ G, Leboulleux S, Leenhardt L, et al. Thyroid incidentalomas: epidemiology, risk stratification with ultrasound and workup. *Eur Thyroid J* 2014;3:154-63. doi:10.1159/000365289
- 4- Ezzat S, Sarti DA, Cain DR, et al. Thyroid incidentalomas. Prevalence by palpation and ultrasonography. *Arch Intern Med* 1994;154:1838-40. PMID: 8053752
- 5- Colonna M, Bossard N, Guizard AV, et al. Descriptive epidemiology of thyroid cancer in France: incidence, mortality and survival. *Ann Endocrinol* 2010;71:95-101. doi:10.1016/j.ando.2009.11.006
- 6 - Colonna M, Guizard AV, Schwartz C, et al. A time trend analysis of papillary and follicular cancers as function of tumour size: a study of data from six cancers registries in France (1983-2000). *Eur J Cancer* 2007;43:891-900. PMID:17289376
- 7 - Brito JP, Morris JC, Montori VM. Thyroid cancer: zealous imaging has increased detection and treatment of low risk tumours. *BMJ* 2013;347:f4706. doi: 10.1136/bmj.f4706
- 8- Gharib H, Papini E, Paschke R. Thyroid nodules: a review of current guidelines, practices, and prospects. *Eur J Endocrinol* 2008;159:493-505. doi:10.1530/EJE-08-0135
- 9 - Paschke R, Hegedüs L, Alexander E, et al. Thyroid nodules guidelines: agreement, disagreement and need for future research. *Nat Rev Endocrinol* 2011;7:354-361. doi:10.1038/nrendo.2011.1
- 10- Wémeau JL, Sadoul JL, d'Herbomez M, et al. Recommandations de la Société Française d'Endocrinologie pour la prise en charge des nodules thyroïdiens. *Presse Med* 2011;40:793-826. doi:10.1016/j.lpm.2011.05.001
- 11 - Tuppin P, de Roquefeuil L, Weill A, Ricordeau P, Merliere Y. French national health insurance information system and the permanent beneficiaries sample. *Rev Epidemiol Sante Pub.* Aug 2010;58(4):286-290. PMID: 20598822. doi:10.1016/j.respe.2010.04.005
- 12 - Maura G1, Blotière PO2, Bouillon K2, Billionnet C2, Ricordeau P2, Alla F2, Zureik M2. Comparison of the short-term risk of bleeding and arterial thromboembolic events in nonvalvular atrial fibrillation patients newly treated with dabigatran or rivaroxaban versus vitamin K antagonists: a French nationwide propensity-matched cohort study. *Circulation.* 2015 Sep 29;132(13):1252-60. doi: 10.1161/CIRCULATIONAHA.115.015710.
- 13- Weill A, Dalichampt M, Raguideau F, Ricordeau P, Blotière PO, Rudant J, Alla F, Zureik M. Low dose oestrogen combined oral contraception and risk of pulmonary embolism, stroke, and myocardial infarction in five million French women: cohort study. *BMJ* 2016 May 10;353:i2002. doi: 10.1136/bmj.i2002.



- 1  
2  
3  
4 14. Colonna M1, Guizard AV, Schwartz C, Velten M, Raverdy N, Molinie F, Delafosse P, Franc  
5 B, Grosclaude P. A time trend analysis of papillary and follicular cancers as a function of  
6 tumour size: a study of data from six cancer registries in France (1983-2000). *Eur J Cancer*  
7 2007 Mar;43(5):891-900. Epub 2007 Feb 7  
8  
9  
10 15 - Horvath E, Majlis S, Rossi R, et al. An ultrasonogram reporting system for thyroid nodules  
11 stratifying cancer risk for clinical management. *J Clin Endocrinol Metab* 2009;94:1748-51.  
12 doi:10.1210/jc.2008-1724  
13  
14 16 - Russ G, Royer B, Bigorgne C, et al. Prospective evaluation of thyroid Imaging reporting and data  
15 system on 4550 nodules with and without elastography. *Eur J Endocrinol* 2013;168:649-55.  
16 doi:10.1530/EJE-12-0936  
17  
18 17- Su SY, Grodski S, Serpell JW. Hypothyroidism following hemithyroidectomy: a retrospective  
19 review. *Ann Surg* 2009;250:991-994. doi: 10.1097/SLA.0b013e3181ae5426.  
20  
21 18- Calo PG, Pisano G, Piga G, et al. Postoperative hematoma after thyroid surgery. Incidence and  
22 risks factors in our experience. *Ann Ital Chir* 2010;81:343-347.  
23  
24 19- Leyre P, Desurmont T, Lacoste L, et al. Does the risk of compressive hematoma after  
25 thyroidectomy authorize 1-day surgery ? *Langenbecks Arch Surg* 2008;393:733-737.  
26  
27 20- Weiss A, Lee KC, Brumund KT, et al. Risk factors for hematoma after thyroidectomy: results from  
28 the nationwide inpatient sample. *Surgery* 2014;156:399-404. doi: 10.1016/j.surg.2014.03.015  
29  
30 21- Promberger R, Ott J, Kober F, et al. Risk factors for postoperative bleeding after thyroid surgery.  
31 *Br J Surg* 2012;99:373-379.  
32  
33 22- Menegaud F. Ambulatory thyroidectomy: recommendations from the Association Francophone  
34 de Chirurgie Endocrinienne (AFCE). Investigating current practices. *J Visc Surg* 2013;150:165-171. doi:  
35 10.1016/j.jviscsurg.2013.04.002  
36  
37 23- Duclos A, Peix JL, Colin C, et al. Influence of experience on performance of individual surgeons in  
38 thyroid surgery: prospective cross-sectional multicentre study. *BMJ* 2012;10. doi:10.1136/BMJD8041  
39  
40 24- Jeannon JP, Orabi AA, Bruch GA, et al. Diagnosis of recurrent laryngeal nerve palsy after  
41 thyroidectomy: a systematic review. *Int J Clin Pract* 2009;63:624-9  
42  
43 25- [http://www.ameli.fr/professionnels-de-sante/medecins/exercer-au-quotidien/aide-a-la-](http://www.ameli.fr/professionnels-de-sante/medecins/exercer-au-quotidien/aide-a-la-pratique-memos/les-memos-de-bonne-pratique/nodule-thyroidien-sans-hyperthyroidie.php)  
44 [pratique-memos/les-memos-de-bonne-pratique/nodule-thyroidien-sans-hyperthyroidie.php,](http://www.ameli.fr/professionnels-de-sante/medecins/exercer-au-quotidien/aide-a-la-pratique-memos/les-memos-de-bonne-pratique/nodule-thyroidien-sans-hyperthyroidie.php)  
45 consulted 12/28/2015.  
46  
47 26. Leboulleux S, Tuttle RM, Pacini F, Schlumberger M. *Lancet Diabetes Endocrinol*. 2016  
48 Nov;4(11):933-942. doi: 10.1016/S2213-8587(16)30180-2. Epub 2016 Aug 20. Papillary thyroid  
49 microcarcinoma: time to shift from surgery to active surveillance?  
50  
51  
52  
53  
54  
55  
56  
57  
58  
59  
60

1  
2  
3  
4  
5  
6  
7  
8  
9  
10  
11  
12  
13  
14  
15  
16  
17  
18  
19  
20  
21  
22  
23  
24  
25  
26  
27  
28  
29  
30  
31  
32  
33  
34  
35  
36  
37  
38  
39  
40  
41  
42  
43  
44  
45  
46  
47  
48  
49  
50  
51  
52  
53  
54  
55  
56  
57  
58  
59  
60

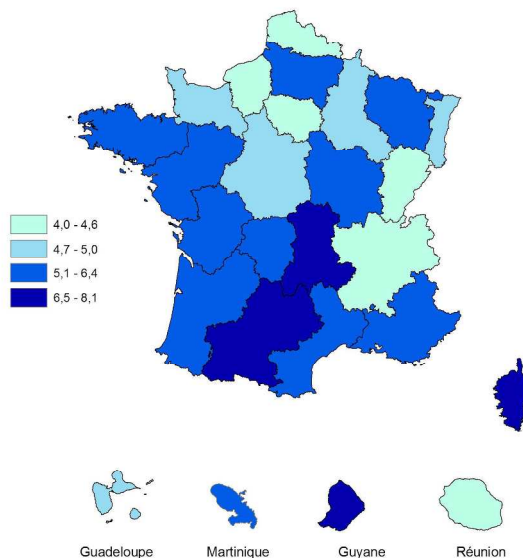

Age and gender standardised rates of patients with thyroidectomy, by region, in 2010, Sniiram, France

254x190mm (300 x 300 DPI)

ew only

1  
2  
3  
4  
5  
6  
7  
8  
9  
10  
11  
12  
13  
14  
15  
16  
17  
18  
19  
20  
21  
22  
23  
24  
25  
26  
27  
28  
29  
30  
31  
32  
33  
34  
35  
36  
37  
38  
39  
40  
41  
42  
43  
44  
45  
46  
47  
48  
49  
50  
51  
52  
53  
54  
55  
56  
57  
58  
59  
60

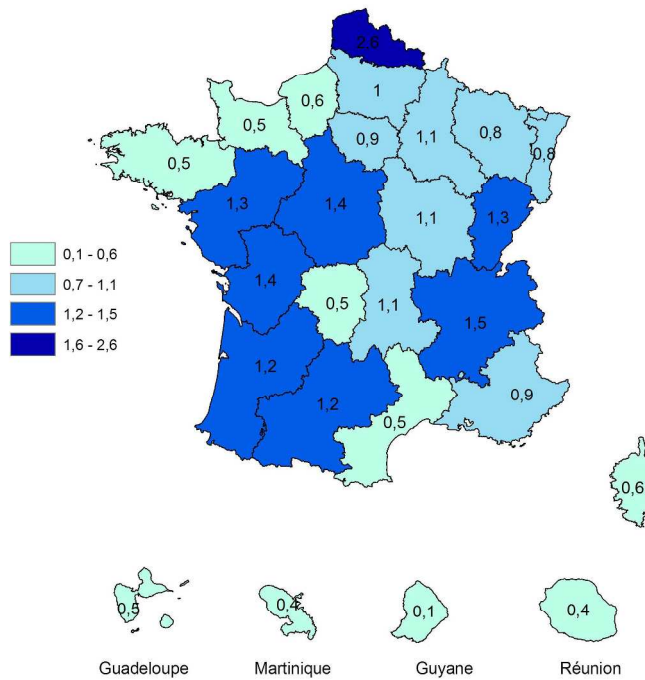

Ratios of the number of thyroidectomies with a diagnosis of cancer over the number of thyroidectomies with a diagnosis of benign nodule, by region, in 2010, Sniiram, France

254x190mm (300 x 300 DPI)

1  
2  
3  
4  
5  
6  
7  
8  
9  
10  
11  
12  
13  
14  
15  
16  
17  
18  
19  
20  
21  
22  
23  
24  
25  
26  
27  
28  
29  
30  
31  
32  
33  
34  
35  
36  
37  
38  
39  
40  
41  
42  
43  
44  
45  
46  
47  
48  
49  
50  
51  
52  
53  
54  
55  
56  
57  
58  
59  
60

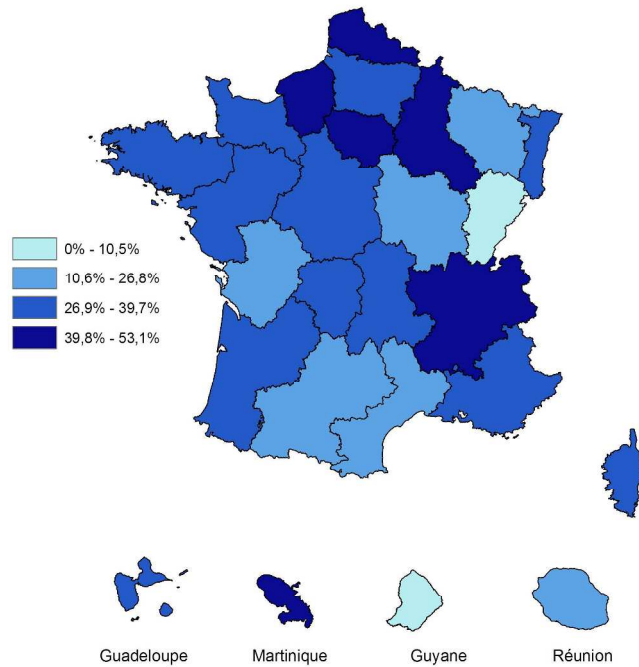

Fine-needle aspiration cytology standardised rates among people with thyroidectomy and a diagnosis of cancer or benign nodule, by region, in 2010, Sniiram, France

254x190mm (300 x 300 DPI)

## STROBE Statement—checklist of items that should be included in reports of observational studies

|                              | Item No    | Recommendation                                                                                                                                                                                                                                                                                                                                                                                                                                                                                                                                                                                                                                                                                   |
|------------------------------|------------|--------------------------------------------------------------------------------------------------------------------------------------------------------------------------------------------------------------------------------------------------------------------------------------------------------------------------------------------------------------------------------------------------------------------------------------------------------------------------------------------------------------------------------------------------------------------------------------------------------------------------------------------------------------------------------------------------|
| <b>Title and abstract</b>    | 1 P3<br>P3 | (a) Indicate the study's design with a commonly used term in the title or the abstract<br>(b) Provide in the abstract an informative and balanced summary of what was done and what was found                                                                                                                                                                                                                                                                                                                                                                                                                                                                                                    |
| <b>Introduction</b>          |            |                                                                                                                                                                                                                                                                                                                                                                                                                                                                                                                                                                                                                                                                                                  |
| Background/rationale         | 2<br>P5-6  | Explain the scientific background and rationale for the investigation being reported                                                                                                                                                                                                                                                                                                                                                                                                                                                                                                                                                                                                             |
| Objectives                   | 3<br>P6    | State specific objectives, including any prespecified hypotheses                                                                                                                                                                                                                                                                                                                                                                                                                                                                                                                                                                                                                                 |
| <b>Methods</b>               |            |                                                                                                                                                                                                                                                                                                                                                                                                                                                                                                                                                                                                                                                                                                  |
| Study design                 | 4<br>P6-10 | Present key elements of study design early in the paper                                                                                                                                                                                                                                                                                                                                                                                                                                                                                                                                                                                                                                          |
| Setting                      | 5<br>P7+P9 | Describe the setting, locations, and relevant dates, including periods of recruitment, exposure, follow-up, and data collection                                                                                                                                                                                                                                                                                                                                                                                                                                                                                                                                                                  |
| Participants                 | 6<br>P7-9  | (a) <i>Cohort study</i> —Give the eligibility criteria, and the sources and methods of selection of participants. Describe methods of follow-up<br><i>Case-control study</i> —Give the eligibility criteria, and the sources and methods of case ascertainment and control selection. Give the rationale for the choice of cases and controls<br><i>Cross-sectional study</i> —Give the eligibility criteria, and the sources and methods of selection of participants<br>(b) <i>Cohort study</i> —For matched studies, give matching criteria and number of exposed and unexposed<br><i>Case-control study</i> —For matched studies, give matching criteria and the number of controls per case |
| Variables                    | 7<br>P9-10 | Clearly define all outcomes, exposures, predictors, potential confounders, and effect modifiers. Give diagnostic criteria, if applicable                                                                                                                                                                                                                                                                                                                                                                                                                                                                                                                                                         |
| Data sources/<br>measurement | P7         | For each variable of interest, give sources of data and details of methods of assessment (measurement). Describe comparability of assessment methods if there is more than one group                                                                                                                                                                                                                                                                                                                                                                                                                                                                                                             |
| Bias                         | 9<br>P9    | Describe any efforts to address potential sources of bias                                                                                                                                                                                                                                                                                                                                                                                                                                                                                                                                                                                                                                        |
| Study size                   | 10<br>P8   | Explain how the study size was arrived at                                                                                                                                                                                                                                                                                                                                                                                                                                                                                                                                                                                                                                                        |
| Quantitative variables       | 11<br>P8   | Explain how quantitative variables were handled in the analyses. If applicable, describe which groupings were chosen and why                                                                                                                                                                                                                                                                                                                                                                                                                                                                                                                                                                     |
| Statistical methods          | 12<br>P7-8 | (a) Describe all statistical methods, including those used to control for confounding<br>(b) Describe any methods used to examine subgroups and interactions<br>(c) Explain how missing data were addressed<br>(d) <i>Cohort study</i> —If applicable, explain how loss to follow-up was addressed<br><i>Case-control study</i> —If applicable, explain how matching of cases and controls was addressed<br><i>Cross-sectional study</i> —If applicable, describe analytical methods taking account of sampling strategy                                                                                                                                                                         |

(e) Describe any sensitivity analyses

Continued on next page

For peer review only

1  
2  
3  
4  
5  
6  
7  
8  
9  
10  
11  
12  
13  
14  
15  
16  
17  
18  
19  
20  
21  
22  
23  
24  
25  
26  
27  
28  
29  
30  
31  
32  
33  
34  
35  
36  
37  
38  
39  
40  
41  
42  
43  
44  
45  
46  
47  
48  
49  
50  
51  
52  
53  
54  
55  
56  
57  
58  
59  
60

**Results**

|                  |                     |                                                                                                                                                                                                                                                                                                                                                                                                               |
|------------------|---------------------|---------------------------------------------------------------------------------------------------------------------------------------------------------------------------------------------------------------------------------------------------------------------------------------------------------------------------------------------------------------------------------------------------------------|
| Participants     | 13*<br>P10          | (a) Report numbers of individuals at each stage of study—eg numbers potentially eligible, examined for eligibility, confirmed eligible, included in the study, completing follow-up, and analysed<br>(b) Give reasons for non-participation at each stage<br>(c) Consider use of a flow diagram                                                                                                               |
| Descriptive data | 14*<br>Table 1      | (a) Give characteristics of study participants (eg demographic, clinical, social) and information on exposures and potential confounders<br>(b) Indicate number of participants with missing data for each variable of interest<br>(c) <i>Cohort study</i> —Summarise follow-up time (eg, average and total amount)                                                                                           |
| Outcome data     | 15*<br>Tables 2-3-4 | <i>Cohort study</i> —Report numbers of outcome events or summary measures over time<br><i>Case-control study</i> —Report numbers in each exposure category, or summary measures of exposure<br><i>Cross-sectional study</i> —Report numbers of outcome events or summary measures                                                                                                                             |
| Main results     | 16<br>NA            | (a) Give unadjusted estimates and, if applicable, confounder-adjusted estimates and their precision (eg, 95% confidence interval). Make clear which confounders were adjusted for and why they were included<br>(b) Report category boundaries when continuous variables were categorized<br>(c) If relevant, consider translating estimates of relative risk into absolute risk for a meaningful time period |
| Other analyses   | 17<br>Tables 2-3-4  | Report other analyses done—eg analyses of subgroups and interactions, and sensitivity analyses                                                                                                                                                                                                                                                                                                                |

**Discussion**

|                  |              |                                                                                                                                                                            |
|------------------|--------------|----------------------------------------------------------------------------------------------------------------------------------------------------------------------------|
| Key results      | 18<br>P13-14 | Summarise key results with reference to study objectives                                                                                                                   |
| Limitations      | 19<br>P14    | Discuss limitations of the study, taking into account sources of potential bias or imprecision. Discuss both direction and magnitude of any potential bias                 |
| Interpretation   | 20<br>P15-18 | Give a cautious overall interpretation of results considering objectives, limitations, multiplicity of analyses, results from similar studies, and other relevant evidence |
| Generalisability | 21<br>P18    | Discuss the generalisability (external validity) of the study results                                                                                                      |

**Other information**

|         |          |                                                                                                                                                               |
|---------|----------|---------------------------------------------------------------------------------------------------------------------------------------------------------------|
| Funding | 22<br>P2 | Give the source of funding and the role of the funders for the present study and, if applicable, for the original study on which the present article is based |
|---------|----------|---------------------------------------------------------------------------------------------------------------------------------------------------------------|

\*Give information separately for cases and controls in case-control studies and, if applicable, for exposed and unexposed groups in cohort and cross-sectional studies.

**Note:** An Explanation and Elaboration article discusses each checklist item and gives methodological background and published examples of transparent reporting. The STROBE checklist is best used in conjunction with this article (freely available on the Web sites of PLoS Medicine at <http://www.plosmedicine.org/>, Annals of Internal Medicine at <http://www.annals.org/>, and Epidemiology at <http://www.epidem.com/>). Information on the STROBE Initiative is available at [www.strobe-statement.org](http://www.strobe-statement.org).

# BMJ Open

## WHAT IS THE CARE PATHWAY OF PATIENTS WHO UNDERGO THYROID SURGERY IN FRANCE AND ITS POTENTIAL PITFALLS ? A NATIONAL COHORT

|                                 |                                                                                                                                                                                                                                                                                                                                                                                                                                                                                                                                                                                                                                                                                                                                                                                                                                                                                                                                                                                                                                                                                                                                                                                                                                                                                                                                                                    |
|---------------------------------|--------------------------------------------------------------------------------------------------------------------------------------------------------------------------------------------------------------------------------------------------------------------------------------------------------------------------------------------------------------------------------------------------------------------------------------------------------------------------------------------------------------------------------------------------------------------------------------------------------------------------------------------------------------------------------------------------------------------------------------------------------------------------------------------------------------------------------------------------------------------------------------------------------------------------------------------------------------------------------------------------------------------------------------------------------------------------------------------------------------------------------------------------------------------------------------------------------------------------------------------------------------------------------------------------------------------------------------------------------------------|
| Journal:                        | <i>BMJ Open</i>                                                                                                                                                                                                                                                                                                                                                                                                                                                                                                                                                                                                                                                                                                                                                                                                                                                                                                                                                                                                                                                                                                                                                                                                                                                                                                                                                    |
| Manuscript ID                   | bmjopen-2016-013589.R2                                                                                                                                                                                                                                                                                                                                                                                                                                                                                                                                                                                                                                                                                                                                                                                                                                                                                                                                                                                                                                                                                                                                                                                                                                                                                                                                             |
| Article Type:                   | Research                                                                                                                                                                                                                                                                                                                                                                                                                                                                                                                                                                                                                                                                                                                                                                                                                                                                                                                                                                                                                                                                                                                                                                                                                                                                                                                                                           |
| Date Submitted by the Author:   | 06-Jan-2017                                                                                                                                                                                                                                                                                                                                                                                                                                                                                                                                                                                                                                                                                                                                                                                                                                                                                                                                                                                                                                                                                                                                                                                                                                                                                                                                                        |
| Complete List of Authors:       | <p>Mathonnet, Muriel; Hospital of Limoges<br/>Cuerq, Anne; Caisse nationale de l'assurance maladie des travailleurs salariés<br/>Tresallet, Christophe; Pitié-Salpêtrière hospital, Department of general, visceral and endocrine surgery, 47/83 Boulevard de l'Hôpital, 75013 Paris, France<br/>Thalabard, Jean-Christophe; Hospital Cochin, Unit of Gynecology and endocrinology, 53 Avenue de l'Observatoire, 75014 Paris, France<br/>Fery-Lemonnier, Elisabeth; Ministry of Health, 14 avenue Duquesne, 75007 Paris<br/>Russ, Gilles; Pitié Salpêtrière hospital, University Paris VI, Institut E3M, Department of thyroid diseases and endocrine tumors, 83 Boulevard de l'Hôpital, 75013 Paris, France<br/>Leenhardt, Laurence; Pitié Salpêtrière hospital, University Paris VI, Institut E3M, Department of thyroid diseases and endocrine tumors, 83 Boulevard de l'Hôpital, 75013 Paris, France<br/>Bigorgne, Claude; La Pitié Salpêtrière Hospital, Department of Pathology, 83 bd de l'Hôpital, 75651 Paris, France<br/>Tuppin, Philippe; Caisse nationale de l'assurance maladie des travailleurs salariés<br/>Millat, Bertrand; Caisse Nationale d'Assurance Maladie des Travailleurs Salariés<br/>Fagot-Campagna, Anne; Caisse Nationale d'Assurance Maladie des Travailleurs Salariés, Département d'études sur les pathologies et les patients</p> |
| <b>Primary Subject Heading</b>: | Diabetes and endocrinology                                                                                                                                                                                                                                                                                                                                                                                                                                                                                                                                                                                                                                                                                                                                                                                                                                                                                                                                                                                                                                                                                                                                                                                                                                                                                                                                         |
| Secondary Subject Heading:      | Public health, Surgery, Ear, nose and throat/otolaryngology, Epidemiology, Oncology                                                                                                                                                                                                                                                                                                                                                                                                                                                                                                                                                                                                                                                                                                                                                                                                                                                                                                                                                                                                                                                                                                                                                                                                                                                                                |
| Keywords:                       | SURGERY, Thyroid disease < DIABETES & ENDOCRINOLOGY, overdiagnosis, cancer                                                                                                                                                                                                                                                                                                                                                                                                                                                                                                                                                                                                                                                                                                                                                                                                                                                                                                                                                                                                                                                                                                                                                                                                                                                                                         |



1  
2  
3  
4  
5  
6  
7  
8  
9  
10  
11  
12  
13  
14  
15  
16  
17  
18  
19  
20  
21  
22  
23  
24  
25  
26  
27  
28  
29  
30  
31  
32  
33  
34  
35  
36  
37  
38  
39  
40  
41  
42  
43  
44  
45  
46  
47  
48  
49  
50  
51  
52  
53  
54  
55  
56  
57  
58  
59  
60

For peer review only

1  
2  
3 **WHAT IS THE CARE PATHWAY OF PATIENTS WHO UNDERGO THYROID SURGERY IN FRANCE AND**  
4  
5 **ITS POTENTIAL PITFALLS? A NATIONAL COHORT.**  
6  
7

8 Muriel Mathonnet<sup>1</sup> MD PhD, Anne Cuerq<sup>2</sup> MSc, Christophe Tresallet<sup>3</sup> MD PhD, Jean-Christophe  
9  
10 Thalabard<sup>4</sup> MD PhD, Elisabeth Fery-Lemonnier<sup>5</sup> MD, Gilles Russ<sup>6</sup> MD, Laurence Leenhardt<sup>6</sup> MD PhD,  
11  
12 Claude Bigorgne<sup>7</sup> MD, Philippe Tuppin<sup>2</sup> MD PhD, Bertrand Millat<sup>8</sup> MD, Anne Fagot-Campagna<sup>2</sup> MD  
13  
14 PhD.  
15

16  
17  
18  
19 **AFFILIATIONS**  
20

21 1 Hospital of Limoges, 2 Avenue Martin Luther King, 87000 Limoges, France  
22

23 2 Caisse Nationale d'Assurance Maladie des Travailleurs Salariés, 50 avenue du Professeur André  
24 Lemierre, 75986 Paris, France  
25

26 3 Pitié-Salpêtrière hospital, Department of general, visceral and endocrine surgery, 47/83 Boulevard  
27 de l'Hôpital, 75013 Paris, France  
28

29 4 Cochin hospital, Unit of Gynecology and endocrinology, 53 Avenue de l'Observatoire, 75014 Paris,  
30 France  
31

32 5. Ministry of Health, 14 avenue Duquesne, 75007 Paris  
33

34 6 Pitié Salpêtrière hospital, University Paris VI, Institut E3M, Department of thyroid diseases and  
35 endocrine tumors, 83 Boulevard de l'Hôpital, 75013 Paris, France  
36

37 7 La Pitié Salpêtrière Hospital, Department of Pathology, 83 bd de l'Hôpital, 75651 Paris, France  
38

39 8 Lapeyronie Hospital, 371 Av. du Doyen Gaston Giraud, 34295 Montpellier Cedex 5 34295  
40 Montpellier cedex 5  
41

42  
43 **CORRESPONDING AUTHOR:** Anne Fagot-Campagna at [anne.fagot@cnamts.fr](mailto:anne.fagot@cnamts.fr)  
44

45  
46 Caisse Nationale d'Assurance Maladie des Travailleurs Salariés, 50 avenue du Professeur André  
47  
48 Lemierre, 75986 Paris, France, Tel 33 1 72 60 20 59  
49

50  
51 **KEY-WORDS:** thyroid; surgery; cancer; Sniiram; overdiagnosis  
52

53 5519 words (text)  
54  
55  
56  
57  
58  
59  
60

**ABSTRACT**

**Context.** The rate of thyroid cancer is increasing in France, as well as concerns about overdiagnosis and treatment.

**Objectives.** To examine the care pathway of patients who undergo thyroid surgery in France and detect potential pitfalls.

**Design.** A large observational study based on medical reimbursements, 2009-2011.

**Setting.** Data from the Sniiram (National Health Insurance Information System).

**Patients.** Patients with thyroid surgery in 2010, classified into four groups: thyroid cancer, benign nodule, goitre or multiple nodules, other (hyperthyroidism, head-neck cancer).

**Main Outcome Measures.** Medical investigations during, prior and after thyroidectomy.

**Results.** A total of 35,367 patients underwent surgery (mean age 51 years, 80% females): 17% had a reported diagnosis of thyroid cancer, 20% benign nodule, 38% goitre or multiple nodules and 25% another diagnosis. The ratio of thyroidectomies with cancer over thyroidectomies with benign nodule was 0.8 and varied across regions. In the year preceding surgery, 82% of patients had an investigation by thyroid ultrasonography, 21% thyroid scintigraphy, 34% fine-needle aspiration cytology, 40% serum calcitonin assay and 54% serum calcium assay. In the following year, all patients with total thyroidectomy and 44% of patients with partial thyroidectomy and a diagnosis of benign nodule were taking thyroid hormone therapy. One hundred patients had been reoperated for a compressive haematoma and 63 died during the first month, half of whom had been operated for cancer. Mean rates of recurrent laryngeal nerve injury and hypocalcaemia (requiring blood tests plus treatments within 4-12 months) were estimated at 1.5% and 3.4%, respectively and were higher in the cancer group (2.3% and 5.7%).

**Conclusion.** This almost nation-wide study demonstrates the suboptimal management of patients prior to thyroidectomy in France. It suggests overdiagnosis and potential harms to patients, and calls for a review of the relevance of thyroidectomy, particularly with regards to microcancers.

## STRENGTHS AND LIMITATIONS OF THIS STUDY

- The Sniiram database includes almost all the insured population in France where medical insurance is mandatory. It is one of the largest administrative databases. It has led to many publications to monitor quality of care, describe health care pathways at a national level and guide public health policies. In this paper, data from 77% of the French population were extracted to study the health care pathway of a cohort of 35,000 people who underwent thyroidectomy in 2010 and provide a national picture.
- This observational study relies on the quality of the surgical procedure coding performed in public or private hospitals, as these procedure codes are necessary in order to classify the 4 groups: cancer, benign nodule, multiple nodules or goitre, other cases. Misclassifications may have occurred, which are more likely to happen in the case of microcancers considered as benign nodules in our study.
- While the Sniiram database records the follow-up and reimbursements of all patients, we still may have missed some non-surgical investigations performed prior to surgery. We used a reasonable one-year interval to define this period but procedures performed during a public hospital stay are not systematically coded within the hospital when they do not provide higher funding to the hospital. However, procedures such as thyroid ultrasonography, scintigraphy, fine-needle aspiration cytology, serum calcitonin and calcium assays are rarely performed during a hospital stay.
- As the Sniiram does not provide outpatient diagnoses, we constructed several algorithms to define potential complications that did not require systematic hospitalisation, such as hypoparathyroidism (defined with more than 3 serum calcium assays and 3 deliveries of calcium supplements during the 4th to 12th months after thyroidectomy) or recurrent laryngeal nerve injury (several definition based on speech therapy sessions, ENT visits or functional testing during the first 12 postoperative months).

## INTRODUCTION

The prevalence of all forms of thyroid disease is difficult to assess. Published clinical trials are often old and the performances of detection have substantially improved over time,<sup>i</sup>[1] consequently modifying patient management. In countries with sufficient dietary iodine intake, such as France or the USA, the clinical prevalence of thyroid nodules is about 5% and is higher in women (5.3 to 6.4% vs 0.8 to 1.6% for men) and persons over the age of 50 years in whom the prevalence is about 30 to 40%,<sup>ii</sup>[2]. The prevalence of thyroid disease based on ultrasonography screening is much higher and is currently estimated to be 67%<sup>iii</sup>[1,3], comparable to the rate of nodules discovered at autopsy,[1,3,4].

The growing prevalence of thyroid cancer has been clearly established. Over the last three decades, the number of new cases diagnosed in France has increased fivefold in both sexes [5,6]. This increased prevalence almost exclusively concerns papillary cancers, with no impact on mortality, which has decreased over the same period. Over a period of 20 years, the proportion of microcancers (<10 mm) has increased from 4% to more than 50%. One-half of these microcancers are smaller than 3 mm and are discovered incidentally on thyroidectomy specimens. This increased prevalence of microcancers is directly related to progress in the detection of nodules by increasingly efficient ultrasound machines and progress in the histological diagnosis of cancer as a result of very thin histological sections and the use of immunohistochemistry. In fact, the majority of these microcancers appear to undergo growth arrest, while progression to symptomatic cancer is observed in only 1 out of every 15 nodules. The increased incidence of thyroid cancer is thus due to microcancers and can be considered to constitute a form of overdiagnosis [7]. The diagnosis of thyroid cancer, regardless of stage, results in an alteration of the patient's quality of life and social representation and can be responsible for sometimes unjustified modifications of therapeutic management or potentially morbid treatment follow-up, resulting in increased costs induced by incidentally discovered cancers.

1  
2  
3 Over the last 10 years, several medical authorities have published guidelines for the management of  
4 thyroid nodules and/or thyroid cancers: the European Thyroid Association (ETA) and the American  
5 Association of Clinical Endocrinologists (AACE) in 2006, the British Thyroid Association (BTA) in 2007,  
6  
7 the National Cancer Institute (NCI) in 2008, the American Thyroid Association (ATA) in 2009 and  
8  
9 2015, and the *Société Française d'Endocrinologie* (SFE) in 2011. Despite several differences, all  
10  
11 medical societies recommend TSH assay and thyroid ultrasound in all patients with thyroid disease  
12  
13 combined with fine-needle aspiration cytology of nodules with features suggestive of malignancy [8-  
14  
15 10]. According to the *Société Française d'Endocrinologie*, the majority of thyroid incidentalomas  
16  
17 require simple surveillance. The indications for thyroid surgery are rare, limited to nodules  
18  
19 demonstrated to be malignant on preoperative investigations, and very large or retrosternal nodules  
20  
21 (10), symptomatic or unsightly goitre or goitre accompanied by low TSH. Despite existing  
22  
23 international and national recommendations, much concern is being currently raised about  
24  
25 overdiagnosis and an excess of thyroidectomy, which may result in harms to the patients [7].  
26  
27  
28  
29

30  
31 The objective of this observational study was to analyse the care pathway of patients prior to  
32  
33 thyroidectomy in France during the year 2010 and to study the impact of surgery on postoperative  
34  
35 morbidity and mortality in the Sniiram (French National Health Insurance Information System)  
36  
37 database, a largely published and nationwide comprehensive administrative database of about 56  
38  
39 million people based on medical reimbursement data [11].  
40  
41  
42  
43  
44  
45

## 46 **METHOD**

### 47 **Information system and population**

48  
49 In France, the Sniiram is an anonymous, individual database concerning all the beneficiaries of the  
50  
51 various national health insurance schemes [11-13]. Medical insurance is mandatory and is provided  
52  
53 by the State for low income people. Many published studies have been based on the Sniiram which  
54  
55  
56  
57  
58  
59  
60

1  
2  
3 stands among the largest medico-administrative databases worldwide and is largely used to guide  
4  
5 public health policies in France as these data allow the systematic follow-up of all medical care  
6  
7 received by the population [12,13]. It exhaustively records all reimbursed prescriptions and  
8  
9 outpatient services and procedures, as well as their date, over the previous three years plus the  
10  
11 current year. Identification of medicinal products is based on the ATC code (Anatomical Therapeutic  
12  
13 Classification), that of laboratory examinations is based on the national laboratory test coding table  
14  
15 and that of procedures is based on the *Classification Commune des Actes Médicaux* (CCAM)  
16  
17 [common classification of medical procedures]. The Sniiram does not contain any clinical data  
18  
19 concerning the results related to prescriptions or examinations, but it nevertheless includes  
20  
21 information on the possible presence of long-term diseases (LTD), such as cancers, eligible for 100%  
22  
23 reimbursement of healthcare expenditure following approval by a national health insurance  
24  
25 physician. These LTD are coded according to the international classification of diseases (ICD 10). A  
26  
27 unique and anonymous identification number for each person also allows integration into the  
28  
29 Sniiram database of the hospital discharge database (PMSI, *Programme de médicalisation des*  
30  
31 *systèmes d'information*). The principal diagnoses and associated diagnoses recorded in the PMSI are  
32  
33 coded according to the ICD 10 and the procedures performed, such as thyroidectomies, are coded  
34  
35 according to the CCAM.  
36  
37  
38  
39

40  
41 In 2010, the national health insurance general scheme (excluding local mutualist sections that  
42  
43 provide medical insurance for e.g., students, teachers) covered about 77% of the 65 million  
44  
45 inhabitants in France including low-income people and was the only scheme for which both vital  
46  
47 status and LTD were comprehensively recorded at that time. Data for the health insurance general  
48  
49 scheme beneficiaries who underwent thyroid surgery in 2010 were extracted from the Sniiram  
50  
51 database. The diagnoses recorded during the hospital stay, and the clinical examinations and  
52  
53 complementary investigations performed one year before and one year after surgery, estimated by  
54  
55 reimbursement data, were analysed. In order to establish an estimate for France as a whole, the  
56  
57  
58  
59  
60

1  
2  
3 sample sizes of general scheme beneficiaries undergoing thyroid surgery were extrapolated (by age-  
4  
5 group and gender) to the national estimates provided by Insee (*Institut national de la statistique et*  
6  
7 *des études économiques*) for the total population of France in January 2011. For the purposes of  
8  
9 regional comparisons, regional rates of the general scheme were standardized for the age and  
10  
11 gender structure of the Insee total population of France in January 2011.  
12

13  
14 Patients who had undergone thyroidectomy were classified into four exclusive groups according to  
15  
16 the type of thyroid disease. The first group was composed of patients who had a diagnosis of thyroid  
17  
18 cancer recorded in the databases. This group included patients with ICD 10 codes for malignant  
19  
20 neoplasm of thyroid gland (C73, D09.3), neoplasm of uncertain behaviour of thyroid gland (D44.0),  
21  
22 hypersecretion of calcitonin (E07.0) or multiple endocrine adenomatosis (D44.8) coded during the  
23  
24 hospital stay for thyroidectomy or in the LTD coding, and patients who underwent lymph node  
25  
26 dissection or radioiodine therapy without a diagnosis of hyperthyroidism.  
27  
28

29  
30 The second group was composed of patients who had a recorded diagnosis of benign nodule  
31  
32 according to ICD 10 codes for nontoxic single thyroid nodule (E04.1), benign nodule of the thyroid  
33  
34 gland (D34) or benign tumour of other and unspecified endocrine glands (D35.7, D35.8; D35.9)  
35  
36 during the hospital stay.  
37  
38

39  
40 The third group was composed of patients who had a recorded diagnosis of goitre or multiple  
41  
42 nodules on the basis of ICD 10 codes for nontoxic diffuse goitre (E04.0), nontoxic multinodular goitre  
43  
44 (E04.2), other specified nontoxic goitre (E04.8), nontoxic goitre, unspecified (E04.9), congenital  
45  
46 hypothyroidism with diffuse goitre (E03.0), dysmorphogenetic goitre (E07.1), or iodine-deficiency-  
47  
48 related goitre (E01.0, E01.1, E01.2).  
49

50  
51 Finally, the fourth group comprised patients who had another recorded diagnosis, especially head  
52  
53 and neck cancer and hyperthyroidism. These patients were excluded from the subsequent analysis,  
54  
55 as thyroidectomy was simply an associated procedure or was performed for hyperthyroidism.  
56  
57



### Definitions and statistical analysis

The care pathway was analysed in rolling years, 12 months before and 12 months after the date of thyroidectomy. A thyroidectomy frequency ratio was calculated between group 1 (cancer) and group 2 (benign nodule), overall and by region. In order to study regional variability, data were standardised for the age and gender of the population of beneficiaries at December 31, 2010. We compared the lowest to the highest value of 25 French regions using chi-square tests. The 26<sup>th</sup> region (Guyana) was excluded due to a small number of cases (7 cases of cancer and 19 benign nodule) and different care pathways occurring in this rural region. Drug treatments were identified by the presence of at least three reimbursements over the 12-month period before and then the 12-month period after hospitalisation. Thyroid ultrasonography, fine-needle aspiration cytology and scintigraphy were identified by the presence of specific codes, whether they were performed in a hospital outpatient department or in private practice. However, the procedures performed during a public hospital stay were not systematically coded at that time, possibly resulting in missing data. Similarly, laboratory tests performed during a public hospital stay were not identified, as they are not reimbursed individually. Reimbursements for hospital outpatient and private practice endocrinology and visits to an ear-nose-throat (ENT) specialist were taken into account. There again, ambulatory visits to a public hospital specialist were not systematically coded at that time, possibly resulting in missing data. Postoperative sick leave allowances were also taken into account.

Complications were identified during the thyroidectomy hospital stay and over the following year from hospitalisation and/or ambulatory reimbursement data. Severe complications were defined by the development of compressive haematoma during the thyroidectomy hospital stay, death (in-hospital or during the first month), or the presence of a CCAM procedure supposedly related to thyroidectomy (tracheobronchial stent, tracheotomy, arytenoidectomy, etc.). Readmissions for thyroid problems or for phosphorus-calcium imbalance were also identified. Various indicators that could also constitute markers of late ENT complications were constructed: at least 2 visits to an ENT

1  
2  
3 specialist, at least 1 visit to a speech therapist, laryngeal function tests looking for recurrent laryngeal  
4  
5 nerve injury, laryngoscopy, etc, over the 12-month period. Hypoparathyroidism was suspected by the  
6  
7 presence of at least 3 serum calcium assays and at least 3 deliveries of calcium supplements over the  
8  
9 period ranging from 4 to 12 months after surgery (to avoid selecting very transient  
10  
11 hypoparathyroidism), or the presence of hospitalisation with a diagnosis of hypoparathyroidism over  
12  
13 the 12-month period.  
14

15  
16  
17 Finally, the numbers of patients who had undergone thyroidectomy and those with LTD for thyroid  
18  
19 cancer from 2010 to 2013 were analysed in order to estimate temporal trends.  
20

21  
22 Statistical analyses were performed with SAS software (SAS Enterprise Guide, version 4.3, SAS  
23  
24 Institute Inc, Cary, NC, USA). Analyses of the SNIIRAM database have been approved by the French  
25  
26 personal data protection agency (*Commission Nationale Informatique et Libertés*). Because the  
27  
28 SNIIRAM database is anonymous, no other ethical approval was required for this study.  
29  
30  
31  
32  
33  
34  
35  
36  
37  
38  
39  
40  
41  
42  
43  
44  
45  
46  
47  
48  
49  
50  
51  
52  
53  
54  
55  
56  
57  
58  
59  
60

## RESULTS

Among 50 million people insured by the health insurance general scheme (77% of the French population), 35,367 underwent thyroid surgery in 2010, i.e. by extrapolation based on the age and gender structure of the French population, about 45,800 people in the overall French population. Patient characteristics and characteristics of the surgical procedures performed are reported in Table 1.

**Table 1 - Characteristics of the 35,367 health insurance general scheme beneficiaries who underwent thyroidectomy in 2010, by the type of thyroid diagnosis, Sniiram, France.**

|                                                                  | Cancer<br>N=5,979<br>(17%) | Benign nodule<br>N=7,270<br>(20%) | Multiple nodules<br>and goitre<br>N=13,350<br>(38%) | Others<br>N=8,768<br>(25%) |
|------------------------------------------------------------------|----------------------------|-----------------------------------|-----------------------------------------------------|----------------------------|
| Age < 20 years                                                   | 1.4%                       | 1.6%                              | 0.4%                                                | 1.0%                       |
| Age < 50 years                                                   | 47%                        | 53%                               | 40%                                                 | 44%                        |
| Women                                                            | 76%                        | 79%                               | 83%                                                 | 79%                        |
| Thyroidectomy                                                    |                            |                                   |                                                     |                            |
| - total or subtotal                                              | 77%                        | 26%                               | 85%                                                 | 79%                        |
| - partial                                                        | 11%                        | 71%                               | 12%                                                 | 18%                        |
| - completion                                                     | 12%                        | 3%                                | 3%                                                  | 3%                         |
| Surgery performed in a public hospital                           | 54%                        | 38%                               | 46%                                                 | 54%                        |
| Surgery practiced in a public or private hospital that performed |                            |                                   |                                                     |                            |
| < 30 thyroid surgeries / year                                    | 16%                        | 24%                               | 17%                                                 | 15%                        |
| > 100 thyroid surgeries / year                                   | 51%                        | 37%                               | 41%                                                 | 55%                        |

Patients with a diagnosis of multiple nodules or goitre represented the largest subgroup (38% of patients), followed by those with a benign nodule (20%) and those with thyroid cancer, regardless of

1  
2  
3 the stage (17%). One quarter of patients had another type of diagnosis, mainly head and neck cancer  
4  
5 or hyperthyroidism. Each of these subgroups comprised 80% women with a mean age of 51 years.  
6  
7 Total thyroidectomy (or completion thyroidectomy) was performed for about 89% of patients with a  
8  
9 postoperative diagnosis of thyroid cancer and 86% of cases of multiple nodules or goitres, while  
10  
11 partial thyroidectomy was performed in 71% of patients with benign nodules. Patients were more  
12  
13 frequently operated in private or public hospitals with high thyroid surgery rates, especially when  
14  
15 they had a diagnosis of thyroid cancer or multiple nodules or goitres.  
16  
17

18  
19 The rate of thyroidectomy with a diagnosis reported as thyroid cancer, nodule or goitre in 2010  
20  
21 (excluding thyroidectomies for head and neck cancer or hyperthyroidism) was 5.3 per 10,000  
22  
23 inhabitants and the standardised rates varied according to regions between 4.0 and 8.1 per 10,000  
24  
25 inhabitants ( $p=0.003$ ) as shown in figure 1.  
26  
27

28  
29 In patients 20 years and older, the ratio of the number of thyroidectomies with a diagnosis of cancer  
30  
31 over the number of thyroidectomies with a diagnosis of benign nodule was 0.8. This ratio varied  
32  
33 between regions from 0.5 in Basse-Normandie, Bretagne, Limousin and Languedoc-Roussillon to 2.6  
34  
35 in Nord-Pas-de-Calais, as shown in figure 2. The percentage of thyroidectomies with a diagnosis of  
36  
37 cancer over the total number of thyroidectomies with a diagnosis of cancer or benign nodule varied  
38  
39 significantly from 28% to 69% ( $p=0.001$ ).  
40  
41

42 During the year preceding thyroid surgery, the health care varied according to the group. Eighty  
43  
44 percent of patients of group 1 ( $n=5,979$ ) who finally had a diagnosis of thyroid cancer had evidence  
45  
46 of investigation by thyroid ultrasonography and 44% by fine-needle aspiration cytology (Table 2)  
47  
48 prior to surgery. In group 2 ( $n=7,270$ ), corresponding to patients who had a recorded diagnosis of  
49  
50 benign nodule, the fine-needle aspiration cytology rate was 34%.  
51  
52  
53  
54  
55  
56  
57  
58  
59  
60

Among people with thyroidectomy and a diagnosis of cancer or benign nodule, the overall fine-needle aspiration cytology rate was 39% and the standardised rates varied according to regions between 11% (Franche-Comté) and 53% (Ile de France) ( $p=0.001$ , figure 3).

**Table 2 - Pre-thyroidectomy care pathway (previous 12 months prior surgery in 2010), by the type of thyroid diagnosis, Sniiram, France.**

|                                                | Cancer<br>N=5,979 | Benign<br>nodule<br>N=7,270 | Multiple<br>nodules<br>and goitre<br>N=13,350 | Cancer /<br>Benign<br>nodule ratio | Cancer /<br>Goitre ratio |
|------------------------------------------------|-------------------|-----------------------------|-----------------------------------------------|------------------------------------|--------------------------|
| Thyroid ultrasound                             | 80%               | 84%                         | 82%                                           | 1.0                                | 1.0                      |
| Fine-needle aspiration cytology of the thyroid | 44%               | 34%                         | 23%                                           | 1.3                                | 1.9                      |
| Thyroid scintigraphy                           | 18%               | 21%                         | 22%                                           | 0.9                                | 0.8                      |
| <i>At least one of the 3</i>                   | <i>89%</i>        | <i>91%</i>                  | <i>88%</i>                                    | <i>1.0</i>                         | <i>1.0</i>               |
| TSH assay                                      | 89%               | 91%                         | 92%                                           | 1.0                                | 1.0                      |
| T3 assay                                       | 36%               | 35%                         | 37%                                           | 1.0                                | 1.0                      |
| T4 assay                                       | 63%               | 65%                         | 66%                                           | 1.0                                | 1.0                      |
| Calcitonin assay                               | 44%               | 39%                         | 39%                                           | 1.1                                | 1.1                      |
| Calcium assay                                  | 58%               | 50%                         | 55%                                           | 1.2                                | 1.1                      |
| <i>No T3, T4 or TSH assay</i>                  | <i>10%</i>        | <i>8%</i>                   | <i>8%</i>                                     | <i>1.2</i>                         | <i>1.3</i>               |
| ≥ 3 thyroid hormone deliveries                 | 21%               | 16%                         | 19%                                           | 1.3                                | 1.1                      |
| ≥ 1 endocrinology consultation                 | 49%               | 44%                         | 49%                                           | 1.1                                | 1.0                      |
| ≥ 1 ear-nose-throat specialist consultation    | 43%               | 49%                         | 43%                                           | 0.9                                | 1.0                      |

In the 3 groups of patients, TSH assays had been performed in about 90% of patients, T4 assay in more than 63% , T3 assay in more than 35% and a thyroid scintigraphy in more than 18%, prior to surgery. Serum calcitonin assay had been performed in 44% of patients and serum calcium assay in 58% of patients who finally had a diagnosis of thyroid cancer. These proportions were 39% and 50%, respectively, for patients with a diagnosis of benign nodule. Less than one-half of patients, regardless of their thyroid disease, were referred to an endocrinologist. Finally, neither thyroid ultrasonography nor fine-needle aspiration cytology was performed in 10% of patients, neither T3, T4 nor TSH assay was performed in about 9% of patients in groups 1 and 2.

1  
2  
3 The fine-needle aspiration cytology rate varied according to the region and was probably related to  
4 the availability of doctors able to perform this technique and cytopathologists. Among the patients  
5 who had undergone surgery and had a diagnosis of thyroid cancer or benign nodule, the fine-needle  
6 aspiration cytology rate was 53% in patients from Ile-de-France and Rhône-Alpes, but only 10% in  
7 those from Franche-Comté (and 0% in Guyana for only 28 patients undergoing surgery). The regional  
8 rates of fine-needle aspiration cytology were significantly correlated with the regional rates of  
9 thyroidectomy (Spearman correlation coefficient test:  $r=0.48$ ,  $p=0.034$ ).  
10  
11  
12  
13  
14  
15  
16  
17

18  
19 During the 12 months following surgery, TSH assay was performed in almost all patients (Table 3). T3  
20 assay was performed in 51% of patients with thyroid cancer, while the rate of total thyroidectomy in  
21 this group was 76%. T3 assay was also performed in 26% of patients with a diagnosis of benign  
22 nodule, but the rate of partial thyroidectomy in this group was 71%. Thyroid hormone replacement  
23 therapy was administered to all patients who had undergone total thyroidectomy and in 44% of  
24 patients who had undergone partial thyroidectomy and had a diagnosis of benign nodule. The  
25 endocrinologist referral rate remained low: 56% of patients with thyroid cancer and 34% of patients  
26 with benign nodule consulted an endocrinologist. The mean duration of sick leave for employed  
27 patients was 89 days for patients with thyroid cancer and 38 days for patients with benign nodules.  
28  
29  
30  
31  
32  
33  
34  
35  
36  
37  
38  
39  
40  
41  
42  
43  
44  
45  
46  
47  
48  
49  
50  
51  
52  
53  
54  
55  
56  
57  
58  
59  
60

Sick leave lasted more than 3 weeks in 60 to 81% of cases, depending on the group.

**Table 3 - Post-thyroidectomy care pathway (following 12 months after surgery in 2010), by the type of thyroid diagnosis, Sniiram, France.**

|                                                  | Cancer<br>N=5,979 | Benign<br>nodule<br>N=7,270 | Multiple<br>nodules<br>and goitre<br>N=13,350 | Cancer /<br>Benign<br>nodule ratio | Cancer /<br>Goitre ratio |
|--------------------------------------------------|-------------------|-----------------------------|-----------------------------------------------|------------------------------------|--------------------------|
| TSH assay                                        | 96%               | 93%                         | 97%                                           | 1.0                                | 1.0                      |
| T3 assay                                         | 51%               | 26%                         | 28%                                           | 2.0                                | 1.9                      |
| T4 assay                                         | 76%               | 63%                         | 68%                                           | 1.2                                | 1.1                      |
| Levothyroxine replacement therapy                | 95%               | 58%                         | 92%                                           | 1.6                                | 1.0                      |
| In those with total thyroidectomy                | 99%               | 97%                         | 99%                                           | 1.0                                | 1.0                      |
| In those with partial thyroidectomy              | 73%               | 44%                         | 48%                                           | 1.7                                | 1.5                      |
| ≥ 1 endocrinology consultation                   | 56%               | 34%                         | 39%                                           | 1.7                                | 1.4                      |
| ≥ 1 ear-nose-throat specialist consultation      | 33%               | 36%                         | 32%                                           | 0.9                                | 1.0                      |
| In patients with at least one day of sick leave: |                   |                             |                                               |                                    |                          |
| mean number of days/patient                      | 89 days           | 38 days                     | 45 days                                       | 2.3                                | 2.0                      |
| % of patients, with                              |                   |                             |                                               |                                    |                          |
| > 10 days of sick leave                          | 96%               | 94%                         | 97%                                           | 1.0                                | 1.0                      |
| >14 days of sick leave                           | 93%               | 85%                         | 93%                                           | 1.1                                | 1.0                      |
| >21 days of sick leave                           | 81%               | 60%                         | 75%                                           | 1.4                                | 1.1                      |

Severe complications of thyroid surgery were rare (Table 4). About twenty patients, 14 in the cancer group and less than 10 in the multiple nodules and goitre group (none in the benign nodule group), died in hospital; another 11 patients died during the first 30 days after surgery, i.e. an overall short-term mortality of about 30 patients. The cause of death is not indicated in these administrative databases. One hundred patients, 25 in the cancer group and 75 all together in the benign nodule group and the goitre group, experienced postoperative compressive haematoma requiring reoperation. This compressive haematoma rate (0.4%) did not appear to be related to the underlying thyroid disease or to the type of surgical procedure performed, such as radical thyroidectomy or lymph node dissection.

**Table 4 – Immediate and late complications of thyroidectomy performed in 2010, by the type of thyroid diagnosis, Sniiram, France.**

|                                                                                       | Cancer<br>N=5,979 | Benign<br>nodule<br>N=7,270 | Multiple<br>nodules<br>and goitre<br>N=13,350 | Cancer /<br>Benign<br>nodule ratio | Cancer /<br>Goitre ratio |
|---------------------------------------------------------------------------------------|-------------------|-----------------------------|-----------------------------------------------|------------------------------------|--------------------------|
| <b>Immediate complications</b>                                                        |                   |                             |                                               |                                    |                          |
| <b>During the hospitalisation:</b>                                                    |                   |                             |                                               |                                    |                          |
| Mean length of stay > 3 days                                                          | 42%               | 29%                         | 39%                                           | 1.4                                | 1.1                      |
| Compressive haematoma                                                                 | 0.4% (n=25)       | 0.3% (n=23)                 | 0.4% (n=52)                                   | 1.3                                | 1.0                      |
| Mortality                                                                             | 0.2% (n=14)       | 0.0% (n=0)                  | 0.0% (n<10)                                   | -                                  | -                        |
| One-month mortality                                                                   | 0.3% (n=19)       | 0.0% (n<10)                 | 0.1% (n=10)                                   | -                                  | -                        |
| <b>Late complications</b>                                                             |                   |                             |                                               |                                    |                          |
| <b>Severe complications*</b>                                                          | 1.4% (n=84)       | 0.4% (n=32)                 | 0.6% (n=86)                                   | 3.5                                | 2.3                      |
| <b>Other complications during the first year</b>                                      |                   |                             |                                               |                                    |                          |
| - At least 2 ear-nose-throat specialist consultations                                 | 15%               | 13%                         | 11%                                           | 1.2                                | 1.3                      |
| - At least 1 speech therapy session                                                   | 8.8%              | 4.1%                        | 6.5%                                          | 2.1                                | 1.4                      |
| - Testing for recurrent laryngeal nerve injury**                                      | 2.3% (n=137)      | 1.2% (n=90)                 | 1.2% (n=164)                                  | 1.9                                | 1.9                      |
| <i>At least 1 of these complications</i>                                              | 23%               | 17%                         | 17%                                           | 1.3                                | 1.3                      |
| <b>Hypoparathyroidism complications</b>                                               |                   |                             |                                               |                                    |                          |
| - At least 3 serum calcium assays and at least 3 deliveries of calcium supplements*** | 5.7%              | 1.0%                        | 3.5%                                          | 5.7                                | 1.6                      |
| - Readmission for hypoparathyroidism                                                  | 0.2% (n=11)       | 0% (n=0)                    | 0% (n=0)                                      | -                                  | -                        |
| <i>At least 1 hypoparathyroidism complication</i>                                     | 5.8%              | 1.0%                        | 3.5%                                          | 5.8                                | 1.7                      |
| <i>At least 1 complication or hypoparathyroidism</i>                                  | 27%               | 18%                         | 20%                                           | 1.5                                | 1.3                      |
| <b>Other readmissions for</b>                                                         |                   |                             |                                               |                                    |                          |
| - Thyroid disorders                                                                   | 6.4%              | 1.4%                        | 2.2%                                          | 4.6                                | 2.9                      |
| - Hypercalcaemia                                                                      | 1.2% (n=71)       | 0.1% (n<10)                 | 0.1% (n=18)                                   | -                                  | -                        |

\* Tracheobronchial stent, tracheotomy, arytenoidectomy, etc.

\*\* Laryngeal function tests, indirect laryngoscopy, etc.

\*\*\* during the 4th to 12th months after thyroidectomy.

The late complication rate was estimated by the number of specialist visits or procedures, or the readmission rate during the year following surgery. Patients with more than 2 ENT or speech therapy visits and patients in whom a laryngeal procedure was performed were considered to have experienced a laryngeal complication. The late complication rate varied according to the group from 17% to 23%, and the recurrent laryngeal nerve injury rate varied from 2.3% to 1.2%. Patients in whom more than 3 serum calcium assays were performed and to whom calcium supplements were dispensed more than three times during the 4<sup>th</sup> to the 12<sup>th</sup> month following surgery were considered to suffer from persistent hypoparathyroidism. This hypoparathyroidism rate ranged from 5.7% for the thyroid cancer group to 1% for the nodule group. Among people with a diagnosis of benign



1  
2  
3 nodule, a marker of hypoparathyroidism was recorded in 10 persons (0.2%) who underwent partial  
4  
5 thyroidectomy and 63 (3%) of those with total or subtotal thyroidectomy. The readmission rate in  
6  
7 the thyroid cancer group was higher for hypercalcaemia than for hypocalcaemia: 1.2% and 0.2%,  
8  
9 respectively.

10  
11  
12 Between 2010 and 2012, the number of patients who had undergone thyroidectomy increased by  
13  
14 400 patients each year, from about 35,400 in 2010 to 36,200 in 2012, i.e. a mean annual growth rate  
15  
16 of +1.1%. This trend was reversed between 2012 and 2013, as the number of patients decreased by  
17  
18 900 patients to 35,300, i.e. a growth rate of -2.6%. The number of patients with LTD 100% health  
19  
20 insurance cover for thyroid cancer increased from 63,311 in 2011, to 65,401 in 2012 and 67,461 in  
21  
22 2013, i.e. a mean annual growth rate of +3.2%. In parallel, between 2010 and 2013 among all general  
23  
24 scheme beneficiaries, the number of thyroid ultrasonography examinations performed increased  
25  
26 from 1.12 million to 1.19 million (+2.2%/year) and the number of thyroid fine-needle aspiration  
27  
28 cytology procedures increased from 89,000 to 98,000 (+3.4%/year), while the number of thyroid  
29  
30 scintigraphies decreased from 66,000 to 58,500 (-3.8%/year). The number of TSH assays (alone or  
31  
32 combined with other parameters) increased from 12.2 million to 14.8 million (+7%/year), while the  
33  
34 number of free T4 assays (alone or combined with other parameters) increased from 3.0 million to  
35  
36 3.6 million (+7%/year), and the number of free T3 assays (alone or combined with other parameters)  
37  
38 also increased from 1.0 million to 1.3 million (+10%/year).  
39  
40  
41  
42  
43  
44  
45  
46  
47  
48  
49  
50  
51  
52  
53  
54  
55  
56  
57  
58  
59  
60

## DISCUSSION

This observational and almost nation-wide study based on more than 35,000 patients first demonstrates the suboptimal management of patients prior to thyroidectomy in France. The thyroidectomy rate with a diagnosis of benign nodule appears to be excessively high compared to the thyroidectomy rate with a diagnosis of thyroid cancer. Furthermore, these rates vary considerably from one region to another, documenting variations in clinical practices across the country. Fine-needle aspiration cytology before surgery for a suspicious thyroid nodule is performed in less than one-half of cases, while this procedure could avoid surgery for a certain number of patients, which, as shown by this study as well as other studies, is not devoid of complications. Secondly, some examinations are performed too frequently, such as preoperative thyroid scintigraphy and T4 assay, and preoperative and postoperative T3 assay. Therefore these data suggest that suboptimal management prior to thyroidectomy leads to overdiagnosis and potential harms to patients [7] as well as a lack of efficiency for the medical insurance system.

The volume of data collected from a database covering 77% of the French population allows us to analyse the health care pathway and evaluate its health impact [11-13]. Although guidelines [8-10] do not specify a maximum interval between preoperative assessment and thyroid surgery, the one-year interval adopted for this study appears to be reasonable. Some non-surgical procedures considered to be necessary to the preoperative and postoperative care pathways may not have been identified from the Sniiram database when they were performed during a public hospital stay as they are not systematically coded within the hospital when they do not provide higher funding to the hospital. However, these non-surgical procedures to investigate thyroid disease are rarely performed during a hospital stay. More importantly, the quality of this study relies on the quality of the surgical procedure coding performed in public or private hospitals, as these procedure codes are necessary in order to classify the 4 groups of thyroidectomies: cancer, benign nodule, multiple nodules or goitre, other cases. Other data were therefore investigated, such as requests for LTD coverage for thyroid

1  
2  
3 cancer, reimbursement for radioiodine therapy or lymph node dissection, to isolate cancer cases.  
4  
5 Nevertheless, it is still possible that the group described as surgery with a diagnosis of benign nodule  
6  
7 included few cases of thyroid cancer, which are more likely to be microcancers. Our dataset also does  
8  
9 not provide information on cancer size. However, the incidence of thyroid cancers and especially the  
10  
11 incidence of micro papillary carcinomas has been studied based on a French registry covering over  
12  
13 3000 cases of thyroid carcinomas and a population over 4,6 million inhabitants [14]. During the 1998-  
14  
15 2000 period, half of thyroid carcinomas diagnosed had a size lower than 10 mm and a third 5 mm or  
16  
17 less. Between the years 1983-1985 and 1998-2000, the number of tumors with a size lower than 10  
18  
19 mm increased 9-fold over the same period.  
20  
21

22  
23 Despite a number of differences, all medical societies recommend TSH assay and thyroid ultrasound,  
24  
25 as a basic work-up in patients with any form of thyroid disease, and a fine needle-aspiration cytology,  
26  
27 guided by the ultrasound feature of nodule guidelines [8-10]. Our analyses show that the  
28  
29 thyroidectomy rate started to decline in France between 2012 and 2013 (-900 thyroidectomies),  
30  
31 although the number of patients with 100% fee coverage for thyroid cancer as LTD continued to  
32  
33 increase. There therefore appears to be both an effect and latency in the diffusion of knowledge  
34  
35 concerning the management of thyroid nodules.  
36  
37

38  
39 TSH assay must be performed as first-line assessment of thyroid disease, as its sensitivity allows the  
40  
41 detection of all cases of thyroid dysfunction [10]. T4 assay should only be requested as second-line  
42  
43 test, together with T3 when TSH is low, and together with anti-TPO antibody assay when TSH is high  
44  
45 [10]. However, in 2010, T4 assay was performed in almost two-thirds of patients and T3 assay in  
46  
47 more than one-third of patients prior to thyroidectomy with thyroid cancer or benign nodule.  
48  
49 Similarly, thyroid scintigraphy is no longer indicated in euthyroid patients [10], but it was performed  
50  
51 prior to thyroidectomy in almost one in five patients who had thyroid cancer or benign nodule.  
52  
53

54  
55 On the other hand, thyroid ultrasonography is an essential part of the diagnostic work-up [8-10,15].  
56  
57 It was frequently performed in our study, but only in 80% to 84% of cases rather than 100% of cases,  
58  
59  
60

1  
2  
3 as other diagnostic examinations may have been performed: neck vessel ultrasonography, neck CT  
4 scan or MRI, for example, which also suggests the possibility of incidentalomas, i.e. incidentally  
5 discovered nodules. The Tirads score, proposed in 2009 [16], can be used to evaluate the ultrasound  
6 risk of malignancy by taking 6 features into account. Based on a series of 4,550 operated nodules, the  
7 sensitivity of the Tirads score to detect malignant lesions varied from 87% to 95%, with a negative  
8 predictive value of 99%, and an excellent inter-observer reproducibility [3,16].  
9  
10  
11  
12  
13  
14  
15

16 Therefore, fine-needle aspiration cytology is recommended for all nodules associated with a high-risk  
17 context according to the Tirads score, all suspicious nodules or nodules larger than 2 cm, before  
18 deciding on the indication for surgery [10]. However, fine-needle aspiration cytology was performed  
19 in less than one-half of patients operated with a diagnosis of thyroid cancer (44%) or benign nodule  
20 (34%).  
21  
22  
23  
24  
25  
26  
27

28 The percentage of patients receiving postoperative levothyroxine replacement therapy appears to be  
29 consistent with the surgical procedure performed, as this rate was 99% among patients who had  
30 undergone total thyroidectomy. Levothyroxine therapy rates after partial thyroidectomy were 73% in  
31 the thyroid cancer group and 44% in the nodule group. The expected hypothyroidism rate after  
32 partial thyroidectomy has been estimated by others to be 11% [17], but this figure must be adjusted  
33 to the volume of thyroid parenchyma left, which is not available in our study. T4 assay was  
34 performed at least once in more than two-thirds of patients. At least one T3 assay was performed in  
35 more than one-fourth of patients after surgery. Although a proportion of patients require adjustment  
36 of thyroid hormone replacement therapy, T3 assay appears to be inappropriate and generates a  
37 considerable excess cost.  
38  
39  
40  
41  
42  
43  
44  
45  
46  
47  
48  
49

50 This excess cost must be added to sick leave allowances received by employed patients. Guidelines  
51 for practitioners were introduced in France in 2010 to recommend sick leave of 10 to 15 days after  
52 thyroidectomy. In our study, more than 85% of patients received sick leave allowances for more than  
53  
54  
55  
56  
57  
58  
59  
60

1  
2  
3 14 days and more than 60% received sick leave allowances for more than 21 days. However, the  
4  
5 specific reasons for extension of sick leave (i.e. difficulties adjusting replacement therapy,  
6  
7 complications of surgery or other causes) are not recorded in the Sniiram database.  
8  
9

10 The postoperative or short-term mortality rates and the rate of compressive haematoma requiring  
11  
12 reoperation, 0.1% and 0.4%, respectively, are situated in the lower end of the ranges reported in the  
13  
14 literature. The postoperative bleeding rate reported in the literature ranges from 0 to 6.5% [18,19].  
15  
16 In 2014, Weiss et al. reported a compressive haematoma rate of 1.25% in a series of 150,012 patients  
17  
18 [20]. Compressive haematoma is associated with a 2.9-fold increased risk of mortality, as mortality  
19  
20 rates were 1.34% in the presence of haematoma vs 0.32% for the overall group. Some authors  
21  
22 consider that thyroid cancer is associated with an increased risk of haematoma,[21] but such an  
23  
24 association was not observed in our cohort. Compressive haematoma can be life-threatening and  
25  
26 requires emergency decompression. It can also occur beyond the 6th postoperative hour. The  
27  
28 *Association Francophone de Chirurgie Endocrinienne* (AFCE) has recently recommended that total  
29  
30 thyroidectomy should not be performed as an ambulatory procedure [22].  
31  
32  
33

34 Hypoparathyroidism and recurrent laryngeal nerve injuries were the most common complications of  
35  
36 thyroidectomy. In the present study, the estimated hypoparathyroidism rate between 4 months and  
37  
38 1 year after surgery was 6% in the thyroid cancer group and 1% in the benign nodule group, on the  
39  
40 basis of more than 3 serum calcium assays and more than 3 deliveries of calcium supplements.  
41  
42 However, it increased up to 3% in the benign nodule group when total thyroidectomy was  
43  
44 performed. The recurrent laryngeal nerve injury rate is more difficult to estimate: 9% and 4% of  
45  
46 patients in the 2 groups attended speech therapy sessions, and 23% and 17% attended at least 2 ENT  
47  
48 visits or speech therapy sessions or underwent functional testing for recurrent laryngeal nerve  
49  
50 injuries during the first 12 postoperative months. The complication rate depends on the time since  
51  
52 the operation, the mode of detection and the definition of postoperative complications. For  
53  
54 example, Duclos et al., using a serum calcium cut-off of 2mmol/L, reported postoperative  
55  
56  
57  
58  
59  
60

1  
2  
3 hypoparathyroidism and permanent hypoparathyroidism rates of 25.9% and 2.7%, respectively [23].  
4  
5 The unilateral or bilateral recurrent laryngeal nerve injury rate varies according to the time since the  
6  
7 operation, 2.3% after one year vs 9.8% immediately postoperatively, and the mode of detection, less  
8  
9 than 2% without specific examination vs more than 6% when indirect laryngoscopy is performed [24].  
10  
11 Our estimations are based on an indirect approach, which can overestimate or underestimate the  
12  
13 true complication rate.  
14  
15

## 19 **Conclusion**

20  
21  
22  
23 With more than 35,400 general scheme beneficiaries (or about 45,800 nation-wide) who underwent  
24  
25 surgery in 2010, and 35,300 in 2013, thyroidectomy is one of the surgical procedures most commonly  
26  
27 performed in France. The thyroidectomy rate with a diagnosis of benign nodule appears to be  
28  
29 excessively high compared to the thyroidectomy rate with a diagnosis of thyroid cancer. Such  
30  
31 assessment is likely to be shared by many European countries [7]. Partial compliance with guidelines  
32  
33 prior to thyroidectomy, especially the low rate of fine-needle aspiration cytology, indicates the need  
34  
35 for large-scale diffusion of current guidelines and clinical practice evaluation by all professionals  
36  
37 involved in the care pathway.  
38  
39

40  
41 Several actions have been initiated by the French national health insurance in 2015 to reduce  
42  
43 potential harms from overdiagnosis and overtreatment. Specific booklets have been developed for  
44  
45 general practitioners and patients [25]. Dedicated visits to general practitioners, specialists and  
46  
47 surgeons are performed. Public or private hospitals with a low ratio of thyroidectomies with a  
48  
49 diagnosis of cancer over thyroidectomies with a diagnosis of benign nodule are monitored.  
50  
51

52  
53 Active surveillance of microcarcinomas with a rigorous patient selection is also being discussed  
54  
55 among international experts [26]. It involves a psychological cost to the patient and a financial cost to  
56  
57

1  
2  
3 the society due to the annual follow-up (medical visit, thyroid and lymph node ultrasound) and  
4  
5 should be discussed with each patient. Some French experts recommend to practice fine needle  
6  
7 aspiration of a micronodule in case of suspicion of lymph node or extra-thyroid involvement, or of a  
8  
9 documented increasing size of the nodule, if the micronodule is based on the isthms or at the highest  
10  
11 third part of the thyroid, or if the patient is aged less than 40 years. An international review of the  
12  
13 relevance of thyroidectomy and assessment of the long-term risk of microcancers is necessary in  
14  
15 view of changing international clinical practices [7,26].  
16  
17  
18  
19  
20  
21  
22  
23  
24  
25  
26  
27  
28  
29  
30  
31  
32  
33  
34  
35  
36  
37  
38  
39  
40  
41  
42  
43  
44  
45  
46  
47  
48  
49  
50  
51  
52  
53  
54  
55  
56  
57  
58  
59  
60

For peer review only

1  
2  
3 **Figure 1. Age and gender standardised rates of patients with thyroidectomy, by region, in 2010,**  
4 **Sniiram, France**

5  
6 **Figure 2. Ratios of the number of thyroidectomies with a diagnosis of cancer over the number of**  
7 **thyroidectomies with a diagnosis of benign nodule, by region, in 2010, Sniiram, France**

8  
9 **Figure 3. Fine-needle aspiration cytology standardised rates among people with thyroidectomy and**  
10 **a diagnosis of cancer or benign nodule, by region, in 2010, Sniiram, France**  
11  
12  
13  
14  
15  
16  
17  
18  
19  
20  
21  
22  
23  
24  
25  
26  
27  
28  
29  
30  
31  
32  
33  
34  
35  
36  
37  
38  
39  
40  
41  
42  
43  
44  
45  
46  
47  
48  
49  
50  
51  
52  
53  
54  
55  
56  
57  
58  
59  
60

For peer review only



**AUTHOR CONTRIBUTION**

**Study concept and design:** Muriel Mathonnet, Anne Cuerq, Christophe Tresallet, Jean-Claude Thalabard, Elisabeth Fery-Lemonnier, Philippe Tuppin, Bertrand Millat, Anne Fagot-Campagna

**Interpretation of data:** Muriel Mathonnet, Anne Cuerq, Christophe Tresallet, Jean-Claude Thalabard, Elisabeth Fery-Lemonnier, Gilles Russ, Laurence Leenhardt, Claude Bigorgne, Philippe Tuppin, Bertrand Millat, Anne Fagot-Campagna

**Drafting of the manuscript:** Muriel Mathonnet, Anne Cuerq, Anne Fagot-Campagna

**Critical revision of the manuscript for important intellectual content:** Muriel Mathonnet, Anne Cuerq, Christophe Tresallet, Jean-Claude Thalabard, Elisabeth Fery-Lemonnier, Gilles Russ, Laurence Leenhardt, Claude Bigorgne, Philippe Tuppin, Bertrand Millat, Anne Fagot-Campagna

**Statistical analysis:** Anne Cuerq

**Study supervision:** Muriel Mathonnet, Bertrand Millat, Anne Fagot-Campagna

All authors give final approval of the version to be published.

The authors have no competing interest.

No additional data are available due to a restrictive access provided by the Commission Nationale Informatique et Libertés (CNIL) to the SNIIRAM database.

No specific funding was provided to this study apart from the time of the employees of the medical insurance system and of experts.

## References

- 1- Dean DS, Gharib H. Epidemiology of thyroid nodules. *Best Pract Res Clin Endocrinol Metab* 2008;22:901-11. PMID: 19041821
- 2- Mazzaferri EL. Management of a solitary thyroid nodule. *N Engl J Med* 1993;238:553-9. PMID: 8426623
- 3- Russ G, Leboulleux S, Leenhardt L, et al. Thyroid incidentalomas: epidemiology, risk stratification with ultrasound and workup. *Eur Thyroid J* 2014;3:154-63. doi:10.1159/000365289
- 4- Ezzat S, Sarti DA, Cain DR, et al. Thyroid incidentalomas. Prevalence by palpation and ultrasonography. *Arch Intern Med* 1994;154:1838-40. PMID: 8053752
- 5- Colonna M, Bossard N, Guizard AV, et al. Descriptive epidemiology of thyroid cancer in France: incidence, mortality and survival. *Ann Endocrinol* 2010;71:95-101. doi:10.1016/j.ando.2009.11.006
- 6 - Colonna M, Guizard AV, Schwartz C, et al. A time trend analysis of papillary and follicular cancers as function of tumour size: a study of data from six cancers registries in France (1983-2000). *Eur J Cancer* 2007;43:891-900. PMID:17289376
- 7 - Brito JP, Morris JC, Montori VM. Thyroid cancer: zealous imaging has increased detection and treatment of low risk tumours. *BMJ* 2013;347:f4706. doi: 10.1136/bmj.f4706
- 8- Gharib H, Papini E, Paschke R. Thyroid nodules: a review of current guidelines, practices, and prospects. *Eur J Endocrinol* 2008;159:493-505. doi:10.1530/EJE-08-0135
- 9 - Paschke R, Hegedüs L, Alexander E, et al. Thyroid nodules guidelines: agreement, disagreement and need for future research. *Nat Rev Endocrinol* 2011;7:354-361. doi:10.1038/nrendo.2011.1
- 10- Wémeau JL, Sadoul JL, d'Herbomez M, et al. Recommandations de la Société Française d'Endocrinologie pour la prise en charge des nodules thyroïdiens. *Presse Med* 2011;40:793-826. doi:10.1016/j.lpm.2011.05.001
- 11 - Tuppin P, de Roquefeuil L, Weill A, Ricordeau P, Merliere Y. French national health insurance information system and the permanent beneficiaries sample. *Rev Epidemiol Sante Pub.* Aug 2010;58(4):286-290. PMID: 20598822. doi:10.1016/j.respe.2010.04.005
- 12 - Maura G1, Blotière PO2, Bouillon K2, Billionnet C2, Ricordeau P2, Alla F2, Zureik M2. Comparison of the short-term risk of bleeding and arterial thromboembolic events in nonvalvular atrial fibrillation patients newly treated with dabigatran or rivaroxaban versus vitamin K antagonists: a French nationwide propensity-matched cohort study. *Circulation.* 2015 Sep 29;132(13):1252-60. doi: 10.1161/CIRCULATIONAHA.115.015710.
- 13- Weill A, Dalichampt M, Raguideau F, Ricordeau P, Blotière PO, Rudant J, Alla F, Zureik M. Low dose oestrogen combined oral contraception and risk of pulmonary embolism, stroke, and

myocardial infarction in five million French women: cohort study. *BMJ* 2016 May 10;353:i2002. doi: 10.1136/bmj.i2002.

14. Colonna M1, Guizard AV, Schwartz C, Velten M, Raverdy N, Molinie F, Delafosse P, Franc B, Grosclaude P. A time trend analysis of papillary and follicular cancers as a function of tumour size: a study of data from six cancer registries in France (1983-2000). *Eur J Cancer* 2007 Mar;43(5):891-900. Epub 2007 Feb 7

15 - Horvath E, Majlis S, Rossi R, et al. An ultrasonogram reporting system for thyroid nodules stratifying cancer risk for clinical management. *J Clin Endocrinol Metab* 2009;94:1748-51. doi:10.1210/jc.2008-1724

16 - Russ G, Royer B, Bigorgne C, et al. Prospective evaluation of thyroid Imaging reporting and data system on 4550 nodules with and without elastography. *Eur J Endocrinol* 2013;168:649-55. doi:10.1530/EJE-12-0936

17- Su SY, Grodski S, Serpell JW. Hypothyroidism following hemithyroidectomy: a retrospective review. *Ann Surg* 2009;250:991-994. doi: 10.1097/SLA.0b013e3181ae5426.

18- Calo PG, Pisano G, Piga G, et al. Postoperative hematoma after thyroid surgery. Incidence and risks factors in our experience. *Ann Ital Chir* 2010;81:343-347.

19- Leyre P, Desurmont T, Lacoste L, et al. Does the risk of compressive hematoma after thyroidectomy authorize 1-day surgery ? *Langenbecks Arch Surg* 2008;393:733-737.

20- Weiss A, Lee KC, Brumund KT, et al. Risk factors for hematoma after thyroidectomy: results from the nationwide inpatient sample. *Surgery* 2014;156:399-404. doi: 10.1016/j.surg.2014.03.015

21- Promberger R, Ott J, Kober F, et al. Risk factors for postoperative bleeding after thyroid surgery. *Br J Surg* 2012;99:373-379.

22- Menegaud F. Ambulatory thyroidectomy: recommendations from the Association Francophone de Chirurgie Endocrinienne (AFCE). Investigating current practices. *J Visc Surg* 2013;150:165-171. doi: 10.1016/j.jvisc Surg.2013.04.002

23- Duclos A, Peix JL, Colin C, et al. Influence of experience on performance of individual surgeons in thyroid surgery: prospective cross-sectional multicentre study. *BMJ* 2012;10. doi:10.1136/BMJD8041

24- Jeannon JP, Orabi AA, Bruch GA, et al. Diagnosis of recurrent laryngeal nerve palsy after thyroidectomy: a systematic review. *Int J Clin Pract* 2009;63:624-9

25- <http://www.ameli.fr/professionnels-de-sante/medecins/exercer-au-quotidien/aide-a-la-pratique-memos/les-memos-de-bonne-pratique/nodule-thyroidien-sans-hyperthyroïdie.php>, consulted 12/28/2015.

1  
2  
3  
4 26. Leboulleux S, Tuttle RM, Pacini F, Schlumberger M. Lancet Diabetes Endocrinol. 2016  
5 Nov;4(11):933-942. doi: 10.1016/S2213-8587(16)30180-2. Epub 2016 Aug 20. Papillary thyroid  
6 microcarcinoma: time to shift from surgery to active surveillance?  
7  
8  
9  
10  
11  
12  
13  
14  
15  
16  
17  
18  
19  
20  
21  
22  
23  
24  
25  
26  
27  
28  
29  
30  
31  
32  
33  
34  
35  
36  
37  
38  
39  
40  
41  
42  
43  
44  
45  
46  
47  
48  
49  
50  
51  
52  
53  
54  
55  
56  
57  
58  
59  
60

For peer review only

1  
2  
3  
4  
5  
6  
7  
8  
9  
10  
11  
12  
13  
14  
15  
16  
17  
18  
19  
20  
21  
22  
23  
24  
25  
26  
27  
28  
29  
30  
31  
32  
33  
34  
35  
36  
37  
38  
39  
40  
41  
42  
43  
44  
45  
46  
47  
48  
49  
50  
51  
52  
53  
54  
55  
56  
57  
58  
59  
60

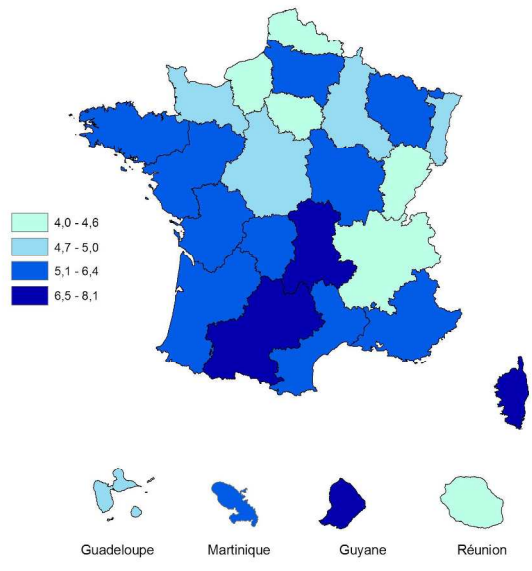

Age and gender standardised rates of patients with thyroidectomy, by region, in 2010, Sniiram, France

254x190mm (300 x 300 DPI)

ew only

1  
2  
3  
4  
5  
6  
7  
8  
9  
10  
11  
12  
13  
14  
15  
16  
17  
18  
19  
20  
21  
22  
23  
24  
25  
26  
27  
28  
29  
30  
31  
32  
33  
34  
35  
36  
37  
38  
39  
40  
41  
42  
43  
44  
45  
46  
47  
48  
49  
50  
51  
52  
53  
54  
55  
56  
57  
58  
59  
60

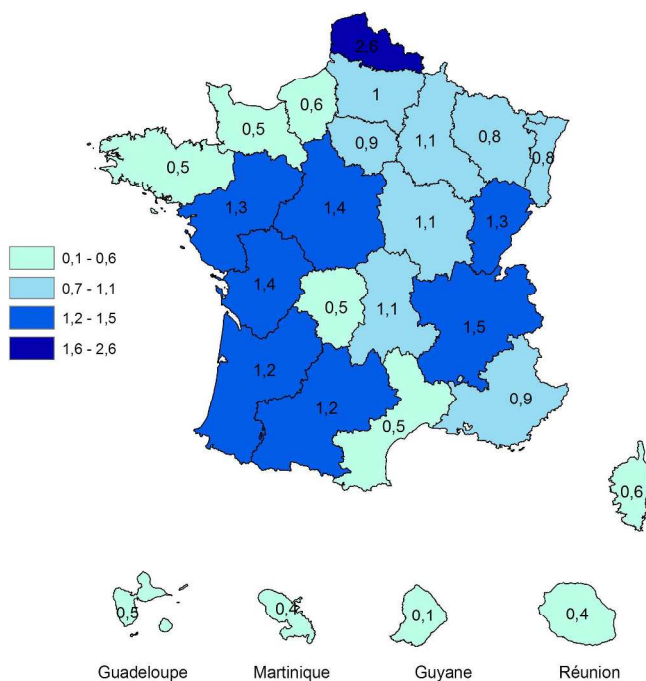

Ratios of the number of thyroidectomies with a diagnosis of cancer over the number of thyroidectomies with a diagnosis of benign nodule, by region, in 2010, Sniiram, France

254x190mm (300 x 300 DPI)

1  
2  
3  
4  
5  
6  
7  
8  
9  
10  
11  
12  
13  
14  
15  
16  
17  
18  
19  
20  
21  
22  
23  
24  
25  
26  
27  
28  
29  
30  
31  
32  
33  
34  
35  
36  
37  
38  
39  
40  
41  
42  
43  
44  
45  
46  
47  
48  
49  
50  
51  
52  
53  
54  
55  
56  
57  
58  
59  
60

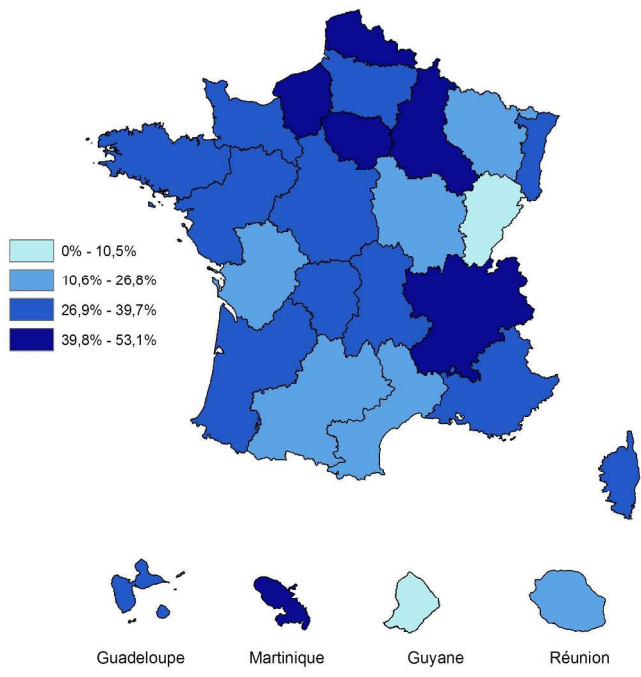

Fine-needle aspiration cytology standardised rates among people with thyroidectomy and a diagnosis of cancer or benign nodule, by region, in 2010, Sniiram, France

254x190mm (300 x 300 DPI)

Peer Review Only

## STROBE Statement—checklist of items that should be included in reports of observational studies

|                              | Item No    | Recommendation                                                                                                                                                                                                                                                                                                                                                                                                                                                                                                                                                                                                                                                                                   |
|------------------------------|------------|--------------------------------------------------------------------------------------------------------------------------------------------------------------------------------------------------------------------------------------------------------------------------------------------------------------------------------------------------------------------------------------------------------------------------------------------------------------------------------------------------------------------------------------------------------------------------------------------------------------------------------------------------------------------------------------------------|
| <b>Title and abstract</b>    | 1 P3<br>P3 | (a) Indicate the study's design with a commonly used term in the title or the abstract<br>(b) Provide in the abstract an informative and balanced summary of what was done and what was found                                                                                                                                                                                                                                                                                                                                                                                                                                                                                                    |
| <b>Introduction</b>          |            |                                                                                                                                                                                                                                                                                                                                                                                                                                                                                                                                                                                                                                                                                                  |
| Background/rationale         | 2<br>P5-6  | Explain the scientific background and rationale for the investigation being reported                                                                                                                                                                                                                                                                                                                                                                                                                                                                                                                                                                                                             |
| Objectives                   | 3<br>P6    | State specific objectives, including any prespecified hypotheses                                                                                                                                                                                                                                                                                                                                                                                                                                                                                                                                                                                                                                 |
| <b>Methods</b>               |            |                                                                                                                                                                                                                                                                                                                                                                                                                                                                                                                                                                                                                                                                                                  |
| Study design                 | 4<br>P6-10 | Present key elements of study design early in the paper                                                                                                                                                                                                                                                                                                                                                                                                                                                                                                                                                                                                                                          |
| Setting                      | 5<br>P7+P9 | Describe the setting, locations, and relevant dates, including periods of recruitment, exposure, follow-up, and data collection                                                                                                                                                                                                                                                                                                                                                                                                                                                                                                                                                                  |
| Participants                 | 6<br>P7-9  | (a) <i>Cohort study</i> —Give the eligibility criteria, and the sources and methods of selection of participants. Describe methods of follow-up<br><i>Case-control study</i> —Give the eligibility criteria, and the sources and methods of case ascertainment and control selection. Give the rationale for the choice of cases and controls<br><i>Cross-sectional study</i> —Give the eligibility criteria, and the sources and methods of selection of participants<br>(b) <i>Cohort study</i> —For matched studies, give matching criteria and number of exposed and unexposed<br><i>Case-control study</i> —For matched studies, give matching criteria and the number of controls per case |
| Variables                    | 7<br>P9-10 | Clearly define all outcomes, exposures, predictors, potential confounders, and effect modifiers. Give diagnostic criteria, if applicable                                                                                                                                                                                                                                                                                                                                                                                                                                                                                                                                                         |
| Data sources/<br>measurement | P7         | For each variable of interest, give sources of data and details of methods of assessment (measurement). Describe comparability of assessment methods if there is more than one group                                                                                                                                                                                                                                                                                                                                                                                                                                                                                                             |
| Bias                         | 9<br>P9    | Describe any efforts to address potential sources of bias                                                                                                                                                                                                                                                                                                                                                                                                                                                                                                                                                                                                                                        |
| Study size                   | 10<br>P8   | Explain how the study size was arrived at                                                                                                                                                                                                                                                                                                                                                                                                                                                                                                                                                                                                                                                        |
| Quantitative variables       | 11<br>P8   | Explain how quantitative variables were handled in the analyses. If applicable, describe which groupings were chosen and why                                                                                                                                                                                                                                                                                                                                                                                                                                                                                                                                                                     |
| Statistical methods          | 12<br>P7-8 | (a) Describe all statistical methods, including those used to control for confounding<br>(b) Describe any methods used to examine subgroups and interactions<br>(c) Explain how missing data were addressed<br>(d) <i>Cohort study</i> —If applicable, explain how loss to follow-up was addressed<br><i>Case-control study</i> —If applicable, explain how matching of cases and controls was addressed<br><i>Cross-sectional study</i> —If applicable, describe analytical methods taking account of sampling strategy                                                                                                                                                                         |



1  
2  
3  
4  
5  
6  
7  
8  
9  
10  
11  
12  
13  
14  
15  
16  
17  
18  
19  
20  
21  
22  
23  
24  
25  
26  
27  
28  
29  
30  
31  
32  
33  
34  
35  
36  
37  
38  
39  
40  
41  
42  
43  
44  
45  
46  
47  
48  
49  
50  
51  
52  
53  
54  
55  
56  
57  
58  
59  
60

(e) Describe any sensitivity analyses

Continued on next page

For peer review only

**Results**

|                  |                     |                                                                                                                                                                                                                                                                                                                                                                                                               |
|------------------|---------------------|---------------------------------------------------------------------------------------------------------------------------------------------------------------------------------------------------------------------------------------------------------------------------------------------------------------------------------------------------------------------------------------------------------------|
| Participants     | 13*<br>P10          | (a) Report numbers of individuals at each stage of study—eg numbers potentially eligible, examined for eligibility, confirmed eligible, included in the study, completing follow-up, and analysed<br>(b) Give reasons for non-participation at each stage<br>(c) Consider use of a flow diagram                                                                                                               |
| Descriptive data | 14*<br>Table 1      | (a) Give characteristics of study participants (eg demographic, clinical, social) and information on exposures and potential confounders<br>(b) Indicate number of participants with missing data for each variable of interest<br>(c) <i>Cohort study</i> —Summarise follow-up time (eg, average and total amount)                                                                                           |
| Outcome data     | 15*<br>Tables 2-3-4 | <i>Cohort study</i> —Report numbers of outcome events or summary measures over time<br><i>Case-control study</i> —Report numbers in each exposure category, or summary measures of exposure<br><i>Cross-sectional study</i> —Report numbers of outcome events or summary measures                                                                                                                             |
| Main results     | 16<br>NA            | (a) Give unadjusted estimates and, if applicable, confounder-adjusted estimates and their precision (eg, 95% confidence interval). Make clear which confounders were adjusted for and why they were included<br>(b) Report category boundaries when continuous variables were categorized<br>(c) If relevant, consider translating estimates of relative risk into absolute risk for a meaningful time period |
| Other analyses   | 17<br>Tables 2-3-4  | Report other analyses done—eg analyses of subgroups and interactions, and sensitivity analyses                                                                                                                                                                                                                                                                                                                |

**Discussion**

|                  |              |                                                                                                                                                                            |
|------------------|--------------|----------------------------------------------------------------------------------------------------------------------------------------------------------------------------|
| Key results      | 18<br>P13-14 | Summarise key results with reference to study objectives                                                                                                                   |
| Limitations      | 19<br>P14    | Discuss limitations of the study, taking into account sources of potential bias or imprecision. Discuss both direction and magnitude of any potential bias                 |
| Interpretation   | 20<br>P15-18 | Give a cautious overall interpretation of results considering objectives, limitations, multiplicity of analyses, results from similar studies, and other relevant evidence |
| Generalisability | 21<br>P18    | Discuss the generalisability (external validity) of the study results                                                                                                      |

**Other information**

|         |          |                                                                                                                                                               |
|---------|----------|---------------------------------------------------------------------------------------------------------------------------------------------------------------|
| Funding | 22<br>P2 | Give the source of funding and the role of the funders for the present study and, if applicable, for the original study on which the present article is based |
|---------|----------|---------------------------------------------------------------------------------------------------------------------------------------------------------------|

\*Give information separately for cases and controls in case-control studies and, if applicable, for exposed and unexposed groups in cohort and cross-sectional studies.

**Note:** An Explanation and Elaboration article discusses each checklist item and gives methodological background and published examples of transparent reporting. The STROBE checklist is best used in conjunction with this article (freely available on the Web sites of PLoS Medicine at <http://www.plosmedicine.org/>, Annals of Internal Medicine at <http://www.annals.org/>, and Epidemiology at <http://www.epidem.com/>). Information on the STROBE Initiative is available at [www.strobe-statement.org](http://www.strobe-statement.org).
